# Supplementary material
Source: PubMed Central journal article supplement (PMC1502394)
Supplement: NIHMS9827-supplement-supporting.pdf [file NIHMS9827-supplement-supporting.pdf]

## Supporting Information

**Table S1.** Complete Crystallographic Details for  $[\text{Fe}(\text{TMP})(2\text{-MeHIm})_2]_2 \cdot [\text{Fe}(\text{TMP})(2\text{-MeHIm})_2]$

|                                           |                                                                                                                                                                                                                                                                         |
|-------------------------------------------|-------------------------------------------------------------------------------------------------------------------------------------------------------------------------------------------------------------------------------------------------------------------------|
| formula                                   | $\text{C}_{259.80}\text{H}_{259.85}\text{Cl}_{1.40}\text{Fe}_4\text{N}_{29.88}\text{O}_{0.76}$                                                                                                                                                                          |
| unit cell content                         | $8 \times \{[\text{Fe}(\text{TMP})(2\text{-MeHIm})_2]_2 \cdot [\text{Fe}(\text{TMP})(2\text{-MeHIm})_2] \cdot \text{C}_6\text{H}_5\text{CH}_3 \cdot 0.94(2\text{-MeHIm}) \cdot 0.7\text{CH}_2\text{Cl}_2 \cdot 0.34\text{CH}_3\text{OH} \cdot 0.42\text{H}_2\text{O}\}$ |
| FW, amu                                   | 4085.99                                                                                                                                                                                                                                                                 |
| $a$ , Å                                   | 39.8634(3)                                                                                                                                                                                                                                                              |
| $c$ , Å                                   | 28.1013(6)                                                                                                                                                                                                                                                              |
| $V$ , Å <sup>3</sup>                      | 44655.5(11)                                                                                                                                                                                                                                                             |
| space group                               | $I\bar{4}$                                                                                                                                                                                                                                                              |
| $Z$                                       | 8                                                                                                                                                                                                                                                                       |
| $D_c$ , g/cm <sup>3</sup>                 | 1.216                                                                                                                                                                                                                                                                   |
| $F(000)$                                  | 1729                                                                                                                                                                                                                                                                    |
| $\mu$ , mm <sup>-1</sup>                  | 0.334                                                                                                                                                                                                                                                                   |
| crystal dimensions, mm                    | $0.33 \times 0.26 \times 0.20$                                                                                                                                                                                                                                          |
| radiation                                 | MoK $\alpha$ , $\bar{\lambda} = 0.71073$ Å                                                                                                                                                                                                                              |
| temperature, K                            | 100(2)                                                                                                                                                                                                                                                                  |
| diffractometer                            | Bruker Apex CCD                                                                                                                                                                                                                                                         |
| $\theta$ range for collected data, deg    | 0.72–26.37                                                                                                                                                                                                                                                              |
| index range                               | $-49 \leq h \leq 49$<br>$-49 \leq k \leq 41$<br>$-35 \leq l \leq 34$                                                                                                                                                                                                    |
| total data collected                      | 194984                                                                                                                                                                                                                                                                  |
| absorption correction                     | Semi-empirical from equivalents                                                                                                                                                                                                                                         |
| relative transmission coefficients (I)    | 0.9373 and 0.8985                                                                                                                                                                                                                                                       |
| unique data                               | 44982 ( $R_{\text{int}} = 0.051$ )                                                                                                                                                                                                                                      |
| unique observed data [ $I > 2\sigma(I)$ ] | 34716                                                                                                                                                                                                                                                                   |
| refinement method                         | Full-matrix least-squares on $F^2$                                                                                                                                                                                                                                      |
| data/restraints/parameters                | 44982/21/2649                                                                                                                                                                                                                                                           |
| goodness-of-fit (pased on $F^2$ )         | 1.008                                                                                                                                                                                                                                                                   |
| final $R$ indices [ $I > 2\sigma(I)$ ]    | $R_1 = 0.0632$ , $wR_2 = 0.1728$                                                                                                                                                                                                                                        |
| final $R$ indices (all data)              | $R_1 = 0.0882$ , $wR_2 = 0.1903$                                                                                                                                                                                                                                        |
| absolute structure parameter              | 0.463(9)                                                                                                                                                                                                                                                                |

**Table S2.** Atomic Coordinates and Equivalent Isotropic Displacement Parameters ( $\text{\AA}^2$ ) for  $[\text{Fe}(\text{TMP})(2\text{-MeHIm})_2]_2 \cdot [\text{Fe}(\text{TMP})(2\text{-MeHIm})_2]$

| atom   | $x$         | $y$         | $z$         | $U(\text{eq})$ |
|--------|-------------|-------------|-------------|----------------|
| Fe(1)  | 0.12793(1)  | 0.37151(1)  | 0.43599(2)  | 0.0184(1)      |
| N(11)  | 0.10401(7)  | 0.35566(8)  | 0.49259(12) | 0.0188(7)      |
| N(12)  | 0.13027(8)  | 0.32544(8)  | 0.41136(12) | 0.0215(7)      |
| N(13)  | 0.15140(8)  | 0.38771(8)  | 0.37911(12) | 0.0212(7)      |
| N(14)  | 0.12538(8)  | 0.41770(8)  | 0.46077(13) | 0.0235(7)      |
| N(15)  | 0.08446(8)  | 0.37748(7)  | 0.39935(11) | 0.0189(7)      |
| C(11)  | 0.05585(10) | 0.39228(10) | 0.41045(15) | 0.0240(9)      |
| N(16)  | 0.03401(8)  | 0.38969(8)  | 0.37349(13) | 0.0260(8)      |
| C(12)  | 0.04935(10) | 0.37251(10) | 0.33758(16) | 0.0276(9)      |
| C(13)  | 0.08030(10) | 0.36533(10) | 0.35348(15) | 0.0263(9)      |
| C(14)  | 0.04649(11) | 0.41080(12) | 0.45465(17) | 0.0353(11)     |
| N(17)  | 0.17207(8)  | 0.36303(9)  | 0.47123(12) | 0.0249(8)      |
| C(15)  | 0.19922(10) | 0.38136(11) | 0.47788(16) | 0.0301(10)     |
| N(18)  | 0.22145(9)  | 0.36347(9)  | 0.50436(14) | 0.0316(8)      |
| C(16)  | 0.20841(12) | 0.33295(13) | 0.51413(19) | 0.0405(12)     |
| C(17)  | 0.17782(11) | 0.33262(12) | 0.49401(18) | 0.0350(11)     |
| C(18)  | 0.20565(11) | 0.41564(11) | 0.4603(2)   | 0.0409(12)     |
| C(1a1) | 0.09898(9)  | 0.37263(10) | 0.53484(15) | 0.0239(9)      |
| C(1a2) | 0.08937(9)  | 0.32453(9)  | 0.49887(14) | 0.0182(8)      |
| C(1a3) | 0.11242(10) | 0.29787(9)  | 0.42705(15) | 0.0222(8)      |
| C(1a4) | 0.14956(9)  | 0.31390(9)  | 0.37422(14) | 0.0212(8)      |
| C(1a5) | 0.16814(9)  | 0.36877(9)  | 0.34602(15) | 0.0214(8)      |
| C(1a6) | 0.15231(10) | 0.42039(9)  | 0.36285(14) | 0.0215(8)      |
| C(1a7) | 0.12955(10) | 0.44674(9)  | 0.43501(16) | 0.0245(9)      |
| C(1a8) | 0.11895(10) | 0.42748(10) | 0.50672(14) | 0.0232(9)      |
| C(1b1) | 0.08107(10) | 0.35182(10) | 0.56720(15) | 0.0246(9)      |
| C(1b2) | 0.07409(10) | 0.32310(10) | 0.54503(15) | 0.0241(9)      |
| C(1b3) | 0.12007(10) | 0.26909(10) | 0.39854(16) | 0.0267(9)      |
| C(1b4) | 0.14361(10) | 0.27878(9)  | 0.36638(15) | 0.0249(9)      |
| C(1b5) | 0.18069(11) | 0.39065(10) | 0.30838(17) | 0.0308(10)     |
| C(1b6) | 0.17009(11) | 0.42161(10) | 0.31804(15) | 0.0285(10)     |
| C(1b7) | 0.12530(11) | 0.47545(11) | 0.46542(17) | 0.0314(10)     |
| C(1b8) | 0.11938(11) | 0.46345(11) | 0.50990(16) | 0.0324(10)     |
| C(1m1) | 0.09181(9)  | 0.29776(9)  | 0.46721(14) | 0.0212(8)      |

**Table S2.** Continued

| atom   | <i>x</i>    | <i>y</i>    | <i>z</i>    | <i>U</i> (eq) |
|--------|-------------|-------------|-------------|---------------|
| C(1m2) | 0.16940(9)  | 0.33400(10) | 0.34428(15) | 0.0231(9)     |
| C(1m3) | 0.14018(9)  | 0.44808(9)  | 0.38776(15) | 0.0229(8)     |
| C(1m4) | 0.10774(10) | 0.40591(10) | 0.54245(16) | 0.0281(9)     |
| C(111) | 0.07319(10) | 0.26638(10) | 0.47974(15) | 0.0224(8)     |
| C(112) | 0.04044(10) | 0.26127(10) | 0.46198(14) | 0.0222(8)     |
| C(113) | 0.02234(10) | 0.23344(10) | 0.47608(15) | 0.0253(9)     |
| C(114) | 0.03600(11) | 0.20979(10) | 0.50762(15) | 0.0265(9)     |
| C(115) | 0.06802(10) | 0.21485(9)  | 0.52416(15) | 0.0237(9)     |
| C(116) | 0.08722(10) | 0.24262(10) | 0.51066(15) | 0.0238(9)     |
| C(117) | 0.02538(11) | 0.28606(11) | 0.42781(16) | 0.0312(10)    |
| C(118) | 0.01614(12) | 0.17964(11) | 0.52272(17) | 0.0355(11)    |
| C(119) | 0.12244(10) | 0.24720(11) | 0.52969(17) | 0.0309(10)    |
| C(121) | 0.19023(9)  | 0.31777(9)  | 0.30766(15) | 0.0206(8)     |
| C(122) | 0.17724(11) | 0.31018(11) | 0.26182(16) | 0.0303(10)    |
| C(123) | 0.19812(12) | 0.29607(12) | 0.22793(17) | 0.0368(11)    |
| C(124) | 0.23078(11) | 0.28842(11) | 0.23684(19) | 0.0381(11)    |
| C(125) | 0.24359(11) | 0.29492(11) | 0.28237(18) | 0.0366(11)    |
| C(126) | 0.22401(10) | 0.30956(10) | 0.31773(16) | 0.0279(9)     |
| C(127) | 0.14205(12) | 0.31963(14) | 0.25000(18) | 0.0454(13)    |
| C(128) | 0.25380(15) | 0.27441(16) | 0.1974(2)   | 0.0640(17)    |
| C(129) | 0.23912(12) | 0.31720(14) | 0.36478(19) | 0.0474(13)    |
| C(131) | 0.13957(10) | 0.48122(10) | 0.36231(15) | 0.0242(9)     |
| C(132) | 0.10900(10) | 0.49242(10) | 0.34292(15) | 0.0270(9)     |
| C(133) | 0.10793(11) | 0.52215(10) | 0.31756(15) | 0.0263(9)     |
| C(134) | 0.13709(11) | 0.54186(10) | 0.31132(15) | 0.0285(9)     |
| C(135) | 0.16683(10) | 0.53042(10) | 0.33073(15) | 0.0263(9)     |
| C(136) | 0.16899(10) | 0.50101(10) | 0.35702(15) | 0.0262(9)     |
| C(137) | 0.07717(11) | 0.47197(10) | 0.34930(17) | 0.0327(10)    |
| C(138) | 0.13564(13) | 0.57464(11) | 0.28524(17) | 0.0384(11)    |
| C(139) | 0.20164(10) | 0.49018(11) | 0.37878(17) | 0.0329(10)    |
| C(141) | 0.10356(11) | 0.41873(11) | 0.59263(16) | 0.0319(10)    |
| C(142) | 0.07366(14) | 0.43438(13) | 0.60723(19) | 0.0475(13)    |
| C(143) | 0.07079(17) | 0.44452(16) | 0.6548(2)   | 0.0647(18)    |
| C(144) | 0.09554(17) | 0.43910(16) | 0.6875(2)   | 0.0603(17)    |

**Table S2.** Continued

| atom   | <i>x</i>    | <i>y</i>    | <i>z</i>    | <i>U</i> (eq) |
|--------|-------------|-------------|-------------|---------------|
| C(145) | 0.12456(15) | 0.42294(16) | 0.6727(2)   | 0.0552(15)    |
| C(146) | 0.12911(12) | 0.41266(13) | 0.62617(17) | 0.0398(12)    |
| C(147) | 0.04506(16) | 0.44010(18) | 0.5724(2)   | 0.072(2)      |
| C(148) | 0.0918(2)   | 0.4510(2)   | 0.7390(2)   | 0.094(3)      |
| C(149) | 0.16052(13) | 0.39515(16) | 0.6113(2)   | 0.0566(16)    |
| Fe(2)  | 0.12392(1)  | 0.86653(1)  | 0.69748(2)  | 0.0180(1)     |
| N(21)  | 0.12258(8)  | 0.82079(8)  | 0.67112(12) | 0.0199(7)     |
| N(22)  | 0.10029(8)  | 0.85157(8)  | 0.75477(12) | 0.0198(7)     |
| N(23)  | 0.12494(8)  | 0.91230(8)  | 0.72346(12) | 0.0229(7)     |
| N(24)  | 0.14730(8)  | 0.88164(8)  | 0.64031(12) | 0.0217(7)     |
| N(25)  | 0.16829(9)  | 0.85387(9)  | 0.72822(13) | 0.0291(8)     |
| C(21)  | 0.19817(12) | 0.86735(14) | 0.72821(18) | 0.0439(13)    |
| N(26)  | 0.22067(9)  | 0.84454(10) | 0.74738(15) | 0.0367(9)     |
| C(22)  | 0.20333(13) | 0.81621(14) | 0.7622(2)   | 0.0488(13)    |
| C(23)  | 0.17167(13) | 0.82144(14) | 0.75029(18) | 0.0421(12)    |
| C(24)  | 0.20759(14) | 0.89958(14) | 0.7093(2)   | 0.0553(15)    |
| N(27)  | 0.08042(8)  | 0.87561(8)  | 0.66240(13) | 0.0225(7)     |
| C(25)  | 0.05309(10) | 0.89361(10) | 0.67293(16) | 0.0286(9)     |
| N(28)  | 0.03109(8)  | 0.89206(9)  | 0.63613(13) | 0.0287(8)     |
| C(26)  | 0.04415(11) | 0.87282(11) | 0.60004(17) | 0.0321(10)    |
| C(27)  | 0.07457(11) | 0.86288(11) | 0.61651(16) | 0.0302(10)    |
| C(28)  | 0.04619(11) | 0.91325(12) | 0.71579(18) | 0.0367(11)    |
| C(2a1) | 0.14083(9)  | 0.80831(9)  | 0.63285(14) | 0.0203(8)     |
| C(2a2) | 0.10348(9)  | 0.79433(10) | 0.68737(15) | 0.0221(8)     |
| C(2a3) | 0.08341(9)  | 0.82141(10) | 0.76070(15) | 0.0219(8)     |
| C(2a4) | 0.09614(9)  | 0.86835(10) | 0.79730(15) | 0.0217(8)     |
| C(2a5) | 0.11867(10) | 0.92243(10) | 0.76986(15) | 0.0248(9)     |
| C(2a6) | 0.13018(10) | 0.94134(9)  | 0.69783(15) | 0.0239(9)     |
| C(2a7) | 0.15054(10) | 0.91434(10) | 0.62518(15) | 0.0231(9)     |
| C(2a8) | 0.16297(9)  | 0.86245(10) | 0.60628(14) | 0.0214(8)     |
| C(2b1) | 0.13259(10) | 0.77349(10) | 0.62526(15) | 0.0246(9)     |
| C(2b2) | 0.10883(10) | 0.76526(10) | 0.65854(15) | 0.0258(9)     |
| C(2b3) | 0.06850(9)  | 0.81973(9)  | 0.80707(15) | 0.0200(8)     |
| C(2b4) | 0.07706(9)  | 0.84857(9)  | 0.83007(15) | 0.0217(8)     |

**Table S2.** Continued

| atom   | $x$          | $y$         | $z$         | $U(\text{eq})$ |
|--------|--------------|-------------|-------------|----------------|
| C(2b5) | 0.12121(12)  | 0.95847(11) | 0.77368(17) | 0.0327(10)     |
| C(2b6) | 0.12700(11)  | 0.97010(10) | 0.72944(16) | 0.0282(9)      |
| C(2b7) | 0.16870(10)  | 0.91541(10) | 0.58137(15) | 0.0268(9)      |
| C(2b8) | 0.17778(10)  | 0.88372(10) | 0.57076(16) | 0.0254(9)      |
| C(2m1) | 0.08376(10)  | 0.79506(9)  | 0.72850(14) | 0.0216(8)      |
| C(2m2) | 0.10691(10)  | 0.90154(9)  | 0.80596(15) | 0.0225(8)      |
| C(2m3) | 0.14032(10)  | 0.94240(10) | 0.65071(15) | 0.0250(9)      |
| C(2m4) | 0.16150(9)   | 0.82721(9)  | 0.60355(14) | 0.0212(8)      |
| C(211) | 0.06267(10)  | 0.76480(10) | 0.74058(15) | 0.0233(9)      |
| C(212) | 0.02928(10)  | 0.76394(10) | 0.72447(14) | 0.0234(8)      |
| C(213) | 0.00931(10)  | 0.73703(10) | 0.73739(15) | 0.0260(9)      |
| C(214) | 0.02127(11)  | 0.71119(10) | 0.76590(15) | 0.0280(9)      |
| C(215) | 0.05431(10)  | 0.71312(10) | 0.78230(15) | 0.0253(9)      |
| C(216) | 0.07537(10)  | 0.73967(9)  | 0.76913(15) | 0.0248(9)      |
| C(217) | 0.01595(10)  | 0.79182(10) | 0.69398(16) | 0.0276(9)      |
| C(218) | -0.00103(13) | 0.68242(11) | 0.78037(18) | 0.0397(12)     |
| C(219) | 0.11085(10)  | 0.74040(10) | 0.78616(16) | 0.0287(9)      |
| C(221) | 0.10260(11)  | 0.91429(11) | 0.85582(16) | 0.0304(10)     |
| C(222) | 0.12848(12)  | 0.90925(13) | 0.88842(19) | 0.0428(12)     |
| C(223) | 0.12299(14)  | 0.91815(16) | 0.93635(19) | 0.0541(15)     |
| C(224) | 0.09373(14)  | 0.93224(14) | 0.95206(19) | 0.0483(13)     |
| C(225) | 0.06806(13)  | 0.93707(11) | 0.91922(17) | 0.0386(11)     |
| C(226) | 0.07214(12)  | 0.92831(11) | 0.87081(17) | 0.0343(10)     |
| C(227) | 0.16106(13)  | 0.89248(19) | 0.8736(2)   | 0.0684(19)     |
| C(228) | 0.08759(17)  | 0.94113(18) | 1.0030(2)   | 0.0683(19)     |
| C(229) | 0.04401(14)  | 0.93354(16) | 0.8374(2)   | 0.0564(16)     |
| C(231) | 0.14061(10)  | 0.97575(10) | 0.62499(15) | 0.0266(9)      |
| C(232) | 0.16966(11)  | 0.99533(10) | 0.62167(16) | 0.0295(10)     |
| C(233) | 0.16861(12)  | 1.02487(10) | 0.59491(17) | 0.0344(11)     |
| C(234) | 0.14024(12)  | 1.03555(10) | 0.57194(17) | 0.0344(11)     |
| C(235) | 0.11150(12)  | 1.01564(10) | 0.57540(16) | 0.0339(10)     |
| C(236) | 0.11137(11)  | 0.98593(10) | 0.60162(16) | 0.0293(9)      |
| C(237) | 0.20154(11)  | 0.98467(12) | 0.64782(19) | 0.0377(11)     |
| C(238) | 0.13978(15)  | 1.06725(12) | 0.5438(2)   | 0.0489(13)     |

**Table S2.** Continued

| atom   | <i>x</i>     | <i>y</i>    | <i>z</i>    | <i>U</i> (eq) |
|--------|--------------|-------------|-------------|---------------|
| C(239) | 0.07976(11)  | 0.96499(11) | 0.60368(18) | 0.0358(11)    |
| C(241) | 0.18068(10)  | 0.81073(9)  | 0.56507(15) | 0.0238(9)     |
| C(242) | 0.17009(11)  | 0.81249(12) | 0.51797(17) | 0.0324(10)    |
| C(243) | 0.19021(12)  | 0.80033(12) | 0.48139(17) | 0.0367(11)    |
| C(244) | 0.22085(11)  | 0.78551(12) | 0.49079(18) | 0.0355(11)    |
| C(245) | 0.23070(10)  | 0.78207(11) | 0.53763(18) | 0.0333(11)    |
| C(246) | 0.21097(10)  | 0.79418(10) | 0.57574(16) | 0.0262(9)     |
| C(247) | 0.13640(11)  | 0.82764(14) | 0.50528(18) | 0.0408(12)    |
| C(248) | 0.24316(14)  | 0.77428(16) | 0.4500(2)   | 0.0583(16)    |
| C(249) | 0.22217(11)  | 0.78893(11) | 0.62602(17) | 0.0328(10)    |
| Fe(3)  | -0.10859(2)  | 0.11671(2)  | 0.16998(2)  | 0.0289(2)     |
| N(35a) | -0.06338(12) | 0.10477(12) | 0.1338(2)   | 0.0345(19)    |
| C(31a) | -0.05194(11) | 0.07442(10) | 0.12318(18) | 0.050(3)      |
| N(36a) | -0.02112(12) | 0.07756(12) | 0.1021(2)   | 0.040(2)      |
| C(32a) | -0.01279(13) | 0.11052(14) | 0.0994(3)   | 0.060(3)      |
| C(33a) | -0.03898(15) | 0.12733(10) | 0.1188(3)   | 0.054(3)      |
| C(34a) | -0.06712(19) | 0.04121(13) | 0.1324(3)   | 0.061(3)      |
| N(35b) | -0.06487(13) | 0.08842(17) | 0.1436(3)   | 0.032(2)      |
| C(31b) | -0.03673(14) | 0.10049(13) | 0.1250(2)   | 0.047(3)      |
| N(36b) | -0.01374(15) | 0.07501(17) | 0.1220(4)   | 0.052(3)      |
| C(32b) | -0.0275(2)   | 0.04631(14) | 0.1391(4)   | 0.097(6)      |
| C(33b) | -0.05918(19) | 0.05461(16) | 0.1523(3)   | 0.061(4)      |
| C(34b) | -0.0284(3)   | 0.13510(16) | 0.1104(4)   | 0.073(5)      |
| N(31)  | -0.08908(9)  | 0.13321(8)  | 0.23394(12) | 0.0266(8)     |
| N(32)  | -0.10583(9)  | 0.16603(8)  | 0.14568(13) | 0.0315(9)     |
| N(33)  | -0.14378(8)  | 0.10734(8)  | 0.11768(12) | 0.0239(7)     |
| N(34)  | -0.12565(8)  | 0.07399(8)  | 0.20507(12) | 0.0246(7)     |
| C(3a1) | -0.08360(10) | 0.11334(10) | 0.27343(15) | 0.0251(9)     |
| C(3a2) | -0.07465(10) | 0.16381(10) | 0.24283(16) | 0.0280(10)    |
| C(3a3) | -0.08910(11) | 0.19227(10) | 0.16640(16) | 0.0308(10)    |
| C(3a4) | -0.11706(11) | 0.17749(11) | 0.10248(15) | 0.0286(9)     |
| C(3a5) | -0.14987(10) | 0.12704(10) | 0.07857(14) | 0.0232(9)     |
| C(3a6) | -0.16198(9)  | 0.07872(9)  | 0.11199(15) | 0.0231(9)     |
| C(3a7) | -0.14634(10) | 0.04971(10) | 0.18693(15) | 0.0260(9)     |

**Table S2.** Continued

| atom   | $x$          | $y$          | $z$          | $U(\text{eq})$ |
|--------|--------------|--------------|--------------|----------------|
| C(3a8) | -0.11556(10) | 0.06263(10)  | 0.24902(16)  | 0.0264(9)      |
| C(3b1) | -0.06430(9)  | 0.13265(9)   | 0.30817(16)  | 0.0244(9)      |
| C(3b2) | -0.05914(10) | 0.16352(10)  | 0.28922(15)  | 0.0247(9)      |
| C(3b3) | -0.08958(12) | 0.22087(11)  | 0.13521(17)  | 0.0355(11)     |
| C(3b4) | -0.10654(11) | 0.21171(11)  | 0.09614(17)  | 0.0332(10)     |
| C(3b5) | -0.17280(10) | 0.10995(10)  | 0.04725(15)  | 0.0261(9)      |
| C(3b6) | -0.18031(10) | 0.08050(10)  | 0.06743(15)  | 0.0252(9)      |
| C(3b7) | -0.14850(11) | 0.02214(10)  | 0.21971(16)  | 0.0291(9)      |
| C(3b8) | -0.12988(11) | 0.03022(10)  | 0.25802(16)  | 0.0283(10)     |
| C(3m1) | -0.07384(11) | 0.19104(10)  | 0.21174(16)  | 0.0297(10)     |
| C(3m2) | -0.13696(10) | 0.15951(10)  | 0.07055(14)  | 0.0247(9)      |
| C(3m3) | -0.16329(9)  | 0.05121(10)  | 0.14352(15)  | 0.0230(8)      |
| C(3m4) | -0.09519(10) | 0.08072(10)  | 0.28139(15)  | 0.0243(9)      |
| C(311) | -0.05720(11) | 0.22257(10)  | 0.22996(15)  | 0.0277(9)      |
| C(312) | -0.07626(11) | 0.24608(11)  | 0.25551(18)  | 0.0350(11)     |
| C(313) | -0.06032(12) | 0.27379(11)  | 0.27474(19)  | 0.0368(11)     |
| C(314) | -0.02574(11) | 0.27927(10)  | 0.26905(17)  | 0.0324(10)     |
| C(315) | -0.00760(11) | 0.25589(10)  | 0.24291(16)  | 0.0320(10)     |
| C(316) | -0.02300(12) | 0.22792(11)  | 0.22295(17)  | 0.0340(10)     |
| C(317) | -0.11377(13) | 0.24147(13)  | 0.2602(3)    | 0.0607(18)     |
| C(318) | -0.00855(13) | 0.30975(12)  | 0.28969(19)  | 0.0435(12)     |
| C(319) | -0.00249(14) | 0.20329(13)  | 0.1943(2)    | 0.0526(14)     |
| C(321) | -0.14432(11) | 0.17461(9)   | 0.02228(15)  | 0.0256(9)      |
| C(322) | -0.12032(12) | 0.17170(13)  | -0.01346(18) | 0.0391(11)     |
| C(323) | -0.12644(14) | 0.18488(14)  | -0.05813(19) | 0.0494(14)     |
| C(324) | -0.15615(15) | 0.20051(13)  | -0.06815(19) | 0.0506(15)     |
| C(325) | -0.17970(13) | 0.20284(11)  | -0.03275(19) | 0.0404(12)     |
| C(326) | -0.17475(12) | 0.19007(11)  | 0.01302(17)  | 0.0347(11)     |
| C(327) | -0.08690(13) | 0.15353(17)  | -0.0042(2)   | 0.0600(16)     |
| C(328) | -0.1615(2)   | 0.21433(19)  | -0.1185(2)   | 0.083(2)       |
| C(329) | -0.20140(13) | 0.19324(13)  | 0.0493(2)    | 0.0480(14)     |
| C(331) | -0.18618(10) | 0.02296(10)  | 0.13025(14)  | 0.0239(9)      |
| C(332) | -0.17558(10) | -0.00221(10) | 0.09824(15)  | 0.0256(9)      |
| C(333) | -0.19802(10) | -0.02752(10) | 0.08571(16)  | 0.0286(9)      |

**Table S2.** Continued

| atom   | $x$          | $y$          | $z$         | $U(\text{eq})$ |
|--------|--------------|--------------|-------------|----------------|
| C(334) | -0.23029(11) | -0.02879(10) | 0.10436(15) | 0.0286(10)     |
| C(335) | -0.24044(10) | -0.00383(10) | 0.13548(15) | 0.0249(9)      |
| C(336) | -0.21895(10) | 0.02228(10)  | 0.14896(15) | 0.0243(9)      |
| C(337) | -0.14062(11) | -0.00220(11) | 0.07737(18) | 0.0357(11)     |
| C(338) | -0.25332(12) | -0.05775(11) | 0.09304(18) | 0.0367(11)     |
| C(339) | -0.23042(11) | 0.04861(11)  | 0.18353(16) | 0.0309(10)     |
| C(341) | -0.08512(10) | 0.06359(10)  | 0.32635(16) | 0.0264(9)      |
| C(342) | -0.10558(12) | 0.06494(11)  | 0.36649(17) | 0.0355(11)     |
| C(343) | -0.09512(14) | 0.04960(12)  | 0.40857(18) | 0.0429(12)     |
| C(344) | -0.06550(14) | 0.03273(11)  | 0.41162(18) | 0.0414(13)     |
| C(345) | -0.04522(13) | 0.03078(11)  | 0.3713(2)   | 0.0428(13)     |
| C(346) | -0.05457(11) | 0.04657(10)  | 0.32847(18) | 0.0343(11)     |
| C(347) | -0.13831(14) | 0.08385(15)  | 0.3655(2)   | 0.0559(15)     |
| C(348) | -0.05383(19) | 0.01603(15)  | 0.4571(2)   | 0.072(2)       |
| C(349) | -0.03156(13) | 0.04442(13)  | 0.2862(2)   | 0.0473(13)     |
| Fe(4a) | -0.12170(2)  | 0.36708(3)   | 0.55615(3)  | 0.0247(2)      |
| N(45a) | -0.13832(9)  | 0.31952(9)   | 0.52756(17) | 0.0379(14)     |
| C(41a) | -0.16638(8)  | 0.30209(8)   | 0.53342(12) | 0.0359(16)     |
| N(46a) | -0.16161(10) | 0.27038(8)   | 0.51579(19) | 0.0529(17)     |
| C(42a) | -0.13000(11) | 0.26772(10)  | 0.4983(2)   | 0.061(2)       |
| C(43a) | -0.11560(8)  | 0.29809(12)  | 0.50570(19) | 0.052(2)       |
| C(44a) | -0.19894(9)  | 0.31269(13)  | 0.5536(2)   | 0.0420(17)     |
| Fe(4b) | -0.11264(5)  | 0.38494(6)   | 0.56732(7)  | 0.0229(4)      |
| N(45b) | -0.0875(3)   | 0.4281(2)    | 0.5930(5)   | 0.058(4)       |
| C(41b) | -0.0999(2)   | 0.4554(2)    | 0.6136(3)   | 0.064(5)       |
| N(46b) | -0.0740(3)   | 0.4769(2)    | 0.6235(5)   | 0.062(4)       |
| C(42b) | -0.0446(2)   | 0.4629(3)    | 0.6092(6)   | 0.096(8)       |
| C(43b) | -0.0531(2)   | 0.4328(3)    | 0.5901(5)   | 0.054(5)       |
| C(44b) | -0.1349(2)   | 0.4635(4)    | 0.6267(6)   | 0.059(5)       |
| Cl(4)  | -0.1153(3)   | 0.4716(3)    | 0.6338(4)   | 0.089(3)       |
| Cl(5)  | -0.0535(3)   | 0.4395(4)    | 0.6109(6)   | 0.124(5)       |
| C(10s) | -0.0969(5)   | 0.4390(8)    | 0.6041(15)  | 0.091(12)      |
| N(41)  | -0.16310(9)  | 0.38547(9)   | 0.59234(13) | 0.0296(8)      |
| N(42)  | -0.10312(8)  | 0.35051(8)   | 0.62057(12) | 0.0235(7)      |



**Table S2.** Continued

| atom   | $x$          | $y$         | $z$         | $U(\text{eq})$ |
|--------|--------------|-------------|-------------|----------------|
| N(43)  | -0.07234(8)  | 0.36460(9)  | 0.52983(13) | 0.0268(8)      |
| N(44)  | -0.13184(8)  | 0.40094(8)  | 0.50255(12) | 0.0255(8)      |
| C(4a1) | -0.18894(10) | 0.40384(11) | 0.57297(16) | 0.0305(10)     |
| C(4a2) | -0.17248(10) | 0.37781(10) | 0.63838(15) | 0.0277(9)      |
| C(4a3) | -0.12105(10) | 0.34698(10) | 0.66172(15) | 0.0249(9)      |
| C(4a4) | -0.07288(9)  | 0.33390(9)  | 0.62765(14) | 0.0197(8)      |
| C(4a5) | -0.04631(10) | 0.34625(10) | 0.54950(14) | 0.0236(9)      |
| C(4a6) | -0.06151(10) | 0.37553(10) | 0.48669(15) | 0.0256(9)      |
| C(4a7) | -0.11246(10) | 0.40788(10) | 0.46311(14) | 0.0229(9)      |
| C(4a8) | -0.16194(10) | 0.41684(10) | 0.49562(15) | 0.0257(9)      |
| C(4b1) | -0.21573(11) | 0.40688(12) | 0.60691(17) | 0.0384(12)     |
| C(4b2) | -0.20545(12) | 0.39100(12) | 0.64712(17) | 0.0398(12)     |
| C(4b3) | -0.10151(10) | 0.32780(9)  | 0.69579(15) | 0.0227(8)      |
| C(4b4) | -0.07205(10) | 0.31998(10) | 0.67433(15) | 0.0238(9)      |
| C(4b5) | -0.01886(10) | 0.34498(11) | 0.51640(16) | 0.0296(10)     |
| C(4b6) | -0.02817(10) | 0.36275(11) | 0.47743(16) | 0.0295(10)     |
| C(4b7) | -0.13068(9)  | 0.42886(10) | 0.43118(15) | 0.0230(8)      |
| C(4b8) | -0.16118(10) | 0.43426(10) | 0.45013(15) | 0.0244(9)      |
| C(4m1) | -0.15345(10) | 0.35940(10) | 0.67057(15) | 0.0265(9)      |
| C(4m2) | -0.04651(9)  | 0.33156(10) | 0.59493(15) | 0.0230(9)      |
| C(4m3) | -0.07969(10) | 0.39628(10) | 0.45541(15) | 0.0256(9)      |
| C(4m4) | -0.18882(10) | 0.41787(10) | 0.52755(15) | 0.0276(9)      |
| C(411) | -0.16709(11) | 0.35241(11) | 0.71960(16) | 0.0302(10)     |
| C(412) | -0.16065(12) | 0.37561(12) | 0.75646(17) | 0.0373(11)     |
| C(413) | -0.17185(14) | 0.36753(13) | 0.80192(19) | 0.0476(13)     |
| C(414) | -0.18845(15) | 0.33858(16) | 0.8125(2)   | 0.0575(17)     |
| C(415) | -0.19461(13) | 0.31642(15) | 0.7759(2)   | 0.0495(14)     |
| C(416) | -0.18419(12) | 0.32273(13) | 0.72916(18) | 0.0398(12)     |
| C(417) | -0.14271(17) | 0.40780(12) | 0.7462(2)   | 0.0579(16)     |
| C(418) | -0.20030(18) | 0.32963(19) | 0.8618(2)   | 0.074(2)       |
| C(419) | -0.19048(15) | 0.29751(15) | 0.6904(2)   | 0.0561(15)     |
| C(421) | -0.01587(9)  | 0.31236(10) | 0.60996(14) | 0.0214(8)      |
| C(422) | -0.01228(10) | 0.27885(10) | 0.59544(15) | 0.0252(9)      |
| C(423) | 0.01645(10)  | 0.26161(11) | 0.61010(15) | 0.0274(9)      |

**Table S2.** Continued

| atom   | $x$          | $y$         | $z$         | $U(\text{eq})$ |
|--------|--------------|-------------|-------------|----------------|
| C(424) | 0.04073(10)  | 0.27613(11) | 0.63795(15) | 0.0273(9)      |
| C(425) | 0.03647(10)  | 0.30882(12) | 0.65188(15) | 0.0298(10)     |
| C(426) | 0.00871(10)  | 0.32782(10) | 0.63780(14) | 0.0239(9)      |
| C(427) | -0.03878(11) | 0.26176(11) | 0.56615(17) | 0.0315(10)     |
| C(428) | 0.07151(11)  | 0.25595(13) | 0.65293(18) | 0.0418(12)     |
| C(429) | 0.00593(11)  | 0.36425(11) | 0.65277(18) | 0.0344(10)     |
| C(431) | -0.06217(10) | 0.40840(10) | 0.41130(15) | 0.0249(9)      |
| C(432) | -0.06425(11) | 0.38992(11) | 0.36879(16) | 0.0302(10)     |
| C(433) | -0.04759(10) | 0.40188(11) | 0.32853(16) | 0.0300(10)     |
| C(434) | -0.02903(10) | 0.43123(12) | 0.32917(17) | 0.0331(10)     |
| C(435) | -0.02754(11) | 0.44918(11) | 0.37166(17) | 0.0337(10)     |
| C(436) | -0.04396(10) | 0.43827(10) | 0.41276(16) | 0.0276(9)      |
| C(437) | -0.08412(14) | 0.35799(12) | 0.36660(19) | 0.0456(13)     |
| C(438) | -0.01032(12) | 0.44327(14) | 0.28634(18) | 0.0461(13)     |
| C(439) | -0.04213(12) | 0.45874(12) | 0.45753(18) | 0.0395(11)     |
| C(441) | -0.21964(10) | 0.43673(11) | 0.51113(15) | 0.0272(9)      |
| C(442) | -0.22106(12) | 0.47141(12) | 0.51568(18) | 0.0363(11)     |
| C(443) | -0.24803(14) | 0.48859(14) | 0.4956(2)   | 0.0482(14)     |
| C(444) | -0.27354(13) | 0.47223(15) | 0.47257(18) | 0.0470(14)     |
| C(445) | -0.27211(11) | 0.43756(15) | 0.46947(18) | 0.0446(13)     |
| C(446) | -0.24578(11) | 0.41909(12) | 0.48910(17) | 0.0345(11)     |
| C(447) | -0.19401(12) | 0.49023(13) | 0.5408(2)   | 0.0498(14)     |
| C(448) | -0.30335(16) | 0.4911(2)   | 0.4515(2)   | 0.078(2)       |
| C(449) | -0.24616(13) | 0.38199(13) | 0.4880(2)   | 0.0508(14)     |
| C(1s)  | 0.1269(2)    | 0.26748(18) | 1.1354(2)   | 0.074(2)       |
| C(2s)  | 0.1284(3)    | 0.3013(2)   | 1.1194(3)   | 0.092(3)       |
| C(3s)  | 0.1574(3)    | 0.3144(2)   | 1.0962(3)   | 0.101(3)       |
| C(4s)  | 0.1876(2)    | 0.29390(18) | 1.0869(3)   | 0.089(3)       |
| C(5s)  | 0.1848(2)    | 0.2604(2)   | 1.1055(3)   | 0.080(2)       |
| C(6s)  | 0.15433(18)  | 0.24731(17) | 1.1293(2)   | 0.0689(19)     |
| C(7s)  | 0.0948(2)    | 0.2541(2)   | 1.1601(3)   | 0.094(3)       |
| Cl(1)  | -0.06716(9)  | 0.26072(11) | 0.40973(18) | 0.0929(12)     |
| Cl(2)  | -0.1209(3)   | 0.2177(3)   | 0.3833(4)   | 0.128(4)       |
| C(8s)  | -0.1070(4)   | 0.2595(4)   | 0.3898(8)   | 0.051(5)       |

**Table S2.** Continued

| atom   | $x$          | $y$         | $z$        | $U(\text{eq})$ |
|--------|--------------|-------------|------------|----------------|
| C(9s)  | -0.0982(5)   | 0.2428(6)   | 0.3806(10) | 0.060(6)       |
| Cl(3)  | -0.1348(3)   | 0.2658(4)   | 0.3778(6)  | 0.159(5)       |
| O(1s)  | 0.0000       | 1.0000      | 0.9412(3)  | 0.057(2)       |
| N(35s) | -0.1725(2)   | 0.1615(3)   | 0.2459(4)  | 0.261(7)       |
| C(31s) | -0.20170(17) | 0.15387(14) | 0.2259(3)  | 0.279(10)      |
| N(36s) | -0.2234(2)   | 0.1434(3)   | 0.2607(3)  | 0.323(10)      |
| C(32s) | -0.2077(3)   | 0.1443(3)   | 0.3035(3)  | 0.196(6)       |
| C(33s) | -0.1762(3)   | 0.1556(3)   | 0.2943(4)  | 0.278(10)      |
| C(34s) | -0.2116(2)   | 0.1545(2)   | 0.1752(3)  | 0.100(3)       |
| C(2os) | 0.0000       | 0.5000      | 0.6610(8)  | 0.150(10)      |
| O(2s)  | -0.0127(4)   | 0.4868(4)   | 0.7076(6)  | 0.106(6)       |

<sup>a</sup> $U(\text{eq})$  is defined as one third of the trace of the orthogonalized  $\mathbf{U}_{ij}$  tensor. The estimated standard deviations of the least significant digits are given in parentheses.

**Table S3.** Bond Lengths for [Fe(TMP)(2-MeHIm)<sub>2</sub>]<sub>2</sub>·[Fe(TMP)(2-MeHIm)]<sub>2</sub>

| bond         | length (Å) | bond          | length (Å) |
|--------------|------------|---------------|------------|
| Fe(1)–N(11)  | 1.959(3)   | Fe(3)–N(34)   | 2.082(3)   |
| Fe(1)–N(13)  | 1.961(3)   | Fe(3)–N(32)   | 2.084(3)   |
| Fe(1)–N(12)  | 1.965(3)   | Fe(3)–N(35a)  | 2.123(4)   |
| Fe(1)–N(14)  | 1.971(3)   | Fe(3)–N(35b)  | 2.204(5)   |
| Fe(1)–N(15)  | 2.030(3)   | N(35a)–C(31a) | 1.3268     |
| Fe(1)–N(17)  | 2.047(3)   | N(35a)–C(33a) | 1.3896     |
| N(11)–C(1a1) | 1.381(5)   | C(31a)–N(36a) | 1.3696     |
| N(11)–C(1a2) | 1.383(5)   | C(31a)–C(34a) | 1.4782     |
| N(12)–C(1a4) | 1.375(5)   | N(36a)–C(32a) | 1.3574     |
| N(12)–C(1a3) | 1.382(5)   | C(32a)–C(33a) | 1.3559     |
| N(13)–C(1a5) | 1.371(5)   | N(35b)–C(31b) | 1.3271     |
| N(13)–C(1a6) | 1.381(5)   | N(35b)–C(33b) | 1.3884     |
| N(14)–C(1a8) | 1.373(5)   | C(31b)–N(36b) | 1.3707     |
| N(14)–C(1a7) | 1.375(5)   | C(31b)–C(34b) | 1.4778     |
| N(15)–C(11)  | 1.321(5)   | N(36b)–C(32b) | 1.3568     |
| N(15)–C(13)  | 1.387(5)   | C(32b)–C(33b) | 1.3565     |
| C(11)–N(16)  | 1.359(5)   | N(31)–C(3a2)  | 1.372(5)   |
| C(11)–C(14)  | 1.492(6)   | N(31)–C(3a1)  | 1.381(5)   |
| N(16)–C(12)  | 1.365(5)   | N(32)–C(3a3)  | 1.371(5)   |
| N(16)–H(16n) | 0.8800     | N(32)–C(3a4)  | 1.372(5)   |
| C(12)–C(13)  | 1.343(6)   | N(33)–C(3a6)  | 1.361(5)   |
| C(12)–H(12)  | 0.9500     | N(33)–C(3a5)  | 1.372(5)   |
| C(13)–H(13)  | 0.9500     | N(34)–C(3a7)  | 1.370(5)   |
| C(14)–H(14a) | 0.9800     | N(34)–C(3a8)  | 1.375(5)   |
| C(14)–H(14b) | 0.9800     | C(3a1)–C(3m4) | 1.398(6)   |
| C(14)–H(14c) | 0.9800     | C(3a1)–C(3b1) | 1.462(6)   |
| N(17)–C(15)  | 1.319(5)   | C(3a2)–C(3m1) | 1.394(6)   |
| N(17)–C(17)  | 1.390(6)   | C(3a2)–C(3b2) | 1.443(6)   |
| C(15)–N(18)  | 1.359(6)   | C(3a3)–C(3m1) | 1.413(6)   |
| C(15)–C(18)  | 1.476(6)   | C(3a3)–C(3b3) | 1.438(6)   |
| N(18)–C(16)  | 1.352(6)   | C(3a4)–C(3m2) | 1.396(6)   |
| N(18)–H(18n) | 0.8800     | C(3a4)–C(3b4) | 1.438(6)   |
| C(16)–C(17)  | 1.344(6)   | C(3a5)–C(3m2) | 1.411(5)   |
| C(16)–H(16)  | 0.9500     | C(3a5)–C(3b5) | 1.440(6)   |

**Table S3.** Continued

| bond          | length (Å) | bond          | length (Å) |
|---------------|------------|---------------|------------|
| C(17)–H(17)   | 0.9500     | C(3a6)–C(3m3) | 1.411(6)   |
| C(18)–H(18a)  | 0.9800     | C(3a6)–C(3b6) | 1.452(6)   |
| C(18)–H(18b)  | 0.9800     | C(3a7)–C(3m3) | 1.396(6)   |
| C(18)–H(18c)  | 0.9800     | C(3a7)–C(3b7) | 1.436(6)   |
| C(1a1)–C(1m4) | 1.389(6)   | C(3a8)–C(3m4) | 1.417(6)   |
| C(1a1)–C(1b1) | 1.423(6)   | C(3a8)–C(3b8) | 1.435(5)   |
| C(1a2)–C(1m1) | 1.393(5)   | C(3b1)–C(3b2) | 1.356(6)   |
| C(1a2)–C(1b2) | 1.434(6)   | C(3b1)–H(3b1) | 0.9500     |
| C(1a3)–C(1m1) | 1.396(6)   | C(3b2)–H(3b2) | 0.9500     |
| C(1a3)–C(1b3) | 1.432(6)   | C(3b3)–C(3b4) | 1.340(6)   |
| C(1a4)–C(1m2) | 1.405(5)   | C(3b3)–H(3b3) | 0.9500     |
| C(1a4)–C(1b4) | 1.437(5)   | C(3b4)–H(3b4) | 0.9500     |
| C(1a5)–C(1m2) | 1.388(5)   | C(3b5)–C(3b6) | 1.338(6)   |
| C(1a5)–C(1b5) | 1.459(6)   | C(3b5)–H(3b5) | 0.9500     |
| C(1a6)–C(1m3) | 1.394(5)   | C(3b6)–H(3b6) | 0.9500     |
| C(1a6)–C(1b6) | 1.446(6)   | C(3b7)–C(3b8) | 1.347(6)   |
| C(1a7)–C(1m3) | 1.395(6)   | C(3b7)–H(3b7) | 0.9500     |
| C(1a7)–C(1b7) | 1.438(6)   | C(3b8)–H(3b8) | 0.9500     |
| C(1a8)–C(1m4) | 1.395(6)   | C(3m1)–C(311) | 1.511(5)   |
| C(1a8)–C(1b8) | 1.437(6)   | C(3m2)–C(321) | 1.513(6)   |
| C(1b1)–C(1b2) | 1.333(6)   | C(3m3)–C(331) | 1.497(5)   |
| C(1b1)–H(1b1) | 0.9500     | C(3m4)–C(341) | 1.491(6)   |
| C(1b2)–H(1b2) | 0.9500     | C(311)–C(316) | 1.394(6)   |
| C(1b3)–C(1b4) | 1.359(6)   | C(311)–C(312) | 1.404(7)   |
| C(1b3)–H(1b3) | 0.9500     | C(312)–C(313) | 1.384(6)   |
| C(1b4)–H(1b4) | 0.9500     | C(312)–C(317) | 1.512(7)   |
| C(1b5)–C(1b6) | 1.332(6)   | C(313)–C(314) | 1.405(7)   |
| C(1b5)–H(1b5) | 0.9500     | C(313)–H(313) | 0.9500     |
| C(1b6)–H(1b6) | 0.9500     | C(314)–C(315) | 1.390(7)   |
| C(1b7)–C(1b8) | 1.359(6)   | C(314)–C(318) | 1.511(6)   |
| C(1b7)–H(1b7) | 0.9500     | C(315)–C(316) | 1.391(6)   |
| C(1b8)–H(1b8) | 0.9500     | C(315)–H(315) | 0.9500     |
| C(1m1)–C(111) | 1.496(5)   | C(316)–C(319) | 1.510(7)   |
| C(1m2)–C(121) | 1.472(5)   | C(317)–H(3d7) | 0.9800     |

**Table S3.** Continued

| bond          | length (Å) | bond          | length (Å) |
|---------------|------------|---------------|------------|
| C(1m3)–C(131) | 1.503(5)   | C(317)–H(3e7) | 0.9800     |
| C(1m4)–C(141) | 1.509(6)   | C(317)–H(3f7) | 0.9800     |
| C(111)–C(116) | 1.402(6)   | C(318)–H(3d8) | 0.9800     |
| C(111)–C(112) | 1.413(5)   | C(318)–H(3e8) | 0.9800     |
| C(112)–C(113) | 1.381(6)   | C(318)–H(3f8) | 0.9800     |
| C(112)–C(117) | 1.503(6)   | C(319)–H(3d9) | 0.9800     |
| C(113)–C(114) | 1.404(6)   | C(319)–H(3e9) | 0.9800     |
| C(113)–H(113) | 0.9500     | C(319)–H(3f9) | 0.9800     |
| C(114)–C(115) | 1.373(6)   | C(321)–C(326) | 1.385(6)   |
| C(114)–C(118) | 1.501(6)   | C(321)–C(322) | 1.392(6)   |
| C(115)–C(116) | 1.399(5)   | C(322)–C(323) | 1.383(7)   |
| C(115)–H(115) | 0.9500     | C(322)–C(327) | 1.539(7)   |
| C(116)–C(119) | 1.513(6)   | C(323)–C(324) | 1.367(8)   |
| C(117)–H(1d7) | 0.9800     | C(323)–H(323) | 0.9500     |
| C(117)–H(1e7) | 0.9800     | C(324)–C(325) | 1.371(8)   |
| C(117)–H(1f7) | 0.9800     | C(324)–C(328) | 1.533(7)   |
| C(118)–H(1d8) | 0.9800     | C(325)–C(326) | 1.397(7)   |
| C(118)–H(1e8) | 0.9800     | C(325)–H(325) | 0.9500     |
| C(118)–H(1f8) | 0.9800     | C(326)–C(329) | 1.477(7)   |
| C(119)–H(1d9) | 0.9800     | C(327)–H(3g7) | 0.9800     |
| C(119)–H(1e9) | 0.9800     | C(327)–H(3h7) | 0.9800     |
| C(119)–H(1f9) | 0.9800     | C(327)–H(3i7) | 0.9800     |
| C(121)–C(126) | 1.414(5)   | C(328)–H(3g8) | 0.9800     |
| C(121)–C(122) | 1.421(6)   | C(328)–H(3h8) | 0.9800     |
| C(122)–C(123) | 1.384(6)   | C(328)–H(3i8) | 0.9800     |
| C(122)–C(127) | 1.490(6)   | C(329)–H(3g9) | 0.9800     |
| C(123)–C(124) | 1.360(7)   | C(329)–H(3h9) | 0.9800     |
| C(123)–H(123) | 0.9500     | C(329)–H(3i9) | 0.9800     |
| C(124)–C(125) | 1.402(7)   | C(331)–C(336) | 1.408(6)   |
| C(124)–C(128) | 1.543(7)   | C(331)–C(332) | 1.412(6)   |
| C(125)–C(126) | 1.392(6)   | C(332)–C(333) | 1.394(6)   |
| C(125)–H(125) | 0.9500     | C(332)–C(337) | 1.512(6)   |
| C(126)–C(129) | 1.484(7)   | C(333)–C(334) | 1.390(6)   |
| C(127)–H(1g7) | 0.9800     | C(333)–H(333) | 0.9500     |

**Table S3.** Continued

| bond          | length (Å) | bond          | length (Å) |
|---------------|------------|---------------|------------|
| C(127)–H(1h7) | 0.9800     | C(334)–C(335) | 1.385(6)   |
| C(127)–H(1i7) | 0.9800     | C(334)–C(338) | 1.509(6)   |
| C(128)–H(1g8) | 0.9800     | C(335)–C(336) | 1.400(6)   |
| C(128)–H(1h8) | 0.9800     | C(335)–H(335) | 0.9500     |
| C(128)–H(1i8) | 0.9800     | C(336)–C(339) | 1.501(6)   |
| C(129)–H(1g9) | 0.9800     | C(337)–H(3j7) | 0.9800     |
| C(129)–H(1h9) | 0.9800     | C(337)–H(3k7) | 0.9800     |
| C(129)–H(1i9) | 0.9800     | C(337)–H(3l7) | 0.9800     |
| C(131)–C(132) | 1.408(6)   | C(338)–H(3j8) | 0.9800     |
| C(131)–C(136) | 1.421(6)   | C(338)–H(3k8) | 0.9800     |
| C(132)–C(133) | 1.383(6)   | C(338)–H(3l8) | 0.9800     |
| C(132)–C(137) | 1.519(6)   | C(339)–H(3j9) | 0.9800     |
| C(133)–C(134) | 1.414(6)   | C(339)–H(3k9) | 0.9800     |
| C(133)–H(133) | 0.9500     | C(339)–H(3l9) | 0.9800     |
| C(134)–C(135) | 1.382(6)   | C(341)–C(342) | 1.393(6)   |
| C(134)–C(138) | 1.499(6)   | C(341)–C(346) | 1.395(6)   |
| C(135)–C(136) | 1.388(6)   | C(342)–C(343) | 1.395(7)   |
| C(135)–H(135) | 0.9500     | C(342)–C(347) | 1.507(7)   |
| C(136)–C(139) | 1.501(6)   | C(343)–C(344) | 1.362(8)   |
| C(137)–H(1j7) | 0.9800     | C(343)–H(343) | 0.9500     |
| C(137)–H(1k7) | 0.9800     | C(344)–C(345) | 1.394(8)   |
| C(137)–H(1l7) | 0.9800     | C(344)–C(348) | 1.514(7)   |
| C(138)–H(1j8) | 0.9800     | C(345)–C(346) | 1.409(7)   |
| C(138)–H(1k8) | 0.9800     | C(345)–H(345) | 0.9500     |
| C(138)–H(1l8) | 0.9800     | C(346)–C(349) | 1.503(7)   |
| C(139)–H(1j9) | 0.9800     | C(347)–H(3m7) | 0.9800     |
| C(139)–H(1k9) | 0.9800     | C(347)–H(3n7) | 0.9800     |
| C(139)–H(1l9) | 0.9800     | C(347)–H(3p7) | 0.9800     |
| C(141)–C(142) | 1.406(7)   | C(348)–H(3m8) | 0.9800     |
| C(141)–C(146) | 1.409(7)   | C(348)–H(3n8) | 0.9800     |
| C(142)–C(143) | 1.401(8)   | C(348)–H(3p8) | 0.9800     |
| C(142)–C(147) | 1.520(9)   | C(349)–H(3m9) | 0.9800     |
| C(143)–C(144) | 1.366(9)   | C(349)–H(3n9) | 0.9800     |
| C(143)–H(143) | 0.9500     | C(349)–H(3l9) | 0.9800     |

**Table S3.** Continued

| bond          | length (Å) | bond          | length (Å) |
|---------------|------------|---------------|------------|
| C(144)–C(145) | 1.388(9)   | Fe(4a)–N(44)  | 2.062(3)   |
| C(144)–C(148) | 1.531(8)   | Fe(4a)–N(42)  | 2.065(4)   |
| C(145)–C(146) | 1.381(7)   | Fe(4a)–N(41)  | 2.073(3)   |
| C(145)–H(145) | 0.9500     | Fe(4a)–N(43)  | 2.104(3)   |
| C(146)–C(149) | 1.493(8)   | Fe(4a)–N(45a) | 2.163(3)   |
| C(147)–H(1m7) | 0.9800     | N(45a)–C(41a) | 1.3271     |
| C(147)–H(1n7) | 0.9800     | N(45a)–C(43a) | 1.3883     |
| C(147)–H(1p7) | 0.9800     | C(41a)–N(46a) | 1.3709     |
| C(148)–H(1m8) | 0.9800     | C(41a)–C(44a) | 1.4781     |
| C(148)–H(1n8) | 0.9800     | N(46a)–C(42a) | 1.3569     |
| C(148)–H(1p8) | 0.9800     | C(42a)–C(43a) | 1.3560     |
| C(149)–H(1m9) | 0.9800     | Fe(4b)–N(42)  | 2.066(4)   |
| C(149)–H(1n9) | 0.9800     | Fe(4b)–N(44)  | 2.075(4)   |
| C(149)–H(1p9) | 0.9800     | Fe(4b)–N(43)  | 2.085(4)   |
| Fe(2)–N(24)   | 1.953(3)   | Fe(4b)–N(45b) | 2.117(9)   |
| Fe(2)–N(22)   | 1.958(3)   | Fe(4b)–N(41)  | 2.131(4)   |
| Fe(2)–N(23)   | 1.965(3)   | N(45b)–C(41b) | 1.3262     |
| Fe(2)–N(21)   | 1.969(3)   | N(45b)–C(43b) | 1.3898     |
| Fe(2)–N(27)   | 2.028(3)   | C(41b)–N(46b) | 1.3703     |
| Fe(2)–N(25)   | 2.032(3)   | C(41b)–C(44b) | 1.4782     |
| N(21)–C(2a2)  | 1.379(5)   | N(46b)–C(42b) | 1.3572     |
| N(21)–C(2a1)  | 1.391(5)   | C(42b)–C(43b) | 1.3562     |
| N(22)–C(2a4)  | 1.380(5)   | Cl(4)–C(10s)  | 1.710(19)  |
| N(22)–C(2a3)  | 1.388(5)   | Cl(5)–C(10s)  | 1.743(19)  |
| N(23)–C(2a6)  | 1.379(5)   | N(41)–C(4a1)  | 1.376(5)   |
| N(23)–C(2a5)  | 1.388(5)   | N(41)–C(4a2)  | 1.381(5)   |
| N(24)–C(2a8)  | 1.375(5)   | N(42)–C(4a3)  | 1.366(5)   |
| N(24)–C(2a7)  | 1.377(5)   | N(42)–C(4a4)  | 1.390(5)   |
| N(25)–C(21)   | 1.307(6)   | N(43)–C(4a6)  | 1.359(5)   |
| N(25)–C(23)   | 1.440(6)   | N(43)–C(4a5)  | 1.385(5)   |
| C(21)–N(26)   | 1.386(7)   | N(44)–C(4a8)  | 1.371(5)   |
| C(21)–C(24)   | 1.440(8)   | N(44)–C(4a7)  | 1.379(5)   |
| N(26)–C(22)   | 1.388(6)   | C(4a1)–C(4m4) | 1.394(6)   |
| N(26)–H(26n)  | 0.8800     | C(4a1)–C(4b1) | 1.437(6)   |



**Table S3.** Continued

| bond          | length (Å) | bond          | length (Å) |
|---------------|------------|---------------|------------|
| C(22)–C(23)   | 1.322(7)   | C(4a2)–C(4m1) | 1.390(6)   |
| C(22)–H(22)   | 0.9500     | C(4a2)–C(4b2) | 1.437(6)   |
| C(23)–H(23)   | 0.9500     | C(4a3)–C(4m1) | 1.405(6)   |
| C(24)–H(24a)  | 0.9800     | C(4a3)–C(4b3) | 1.452(6)   |
| C(24)–H(24b)  | 0.9800     | C(4a4)–C(4m2) | 1.400(5)   |
| C(24)–H(24c)  | 0.9800     | C(4a4)–C(4b4) | 1.425(6)   |
| N(27)–C(25)   | 1.338(5)   | C(4a5)–C(4m2) | 1.405(6)   |
| N(27)–C(27)   | 1.405(6)   | C(4a5)–C(4b5) | 1.437(6)   |
| C(25)–N(28)   | 1.357(6)   | C(4a6)–C(4m3) | 1.407(6)   |
| C(25)–C(28)   | 1.463(6)   | C(4a6)–C(4b6) | 1.447(6)   |
| N(28)–C(26)   | 1.374(6)   | C(4a7)–C(4m3) | 1.402(5)   |
| N(28)–H(28n)  | 0.8800     | C(4a7)–C(4b7) | 1.426(6)   |
| C(26)–C(27)   | 1.357(6)   | C(4a8)–C(4m4) | 1.398(6)   |
| C(26)–H(26)   | 0.9500     | C(4a8)–C(4b8) | 1.455(6)   |
| C(27)–H(27)   | 0.9500     | C(4b1)–C(4b2) | 1.358(6)   |
| C(28)–H(28a)  | 0.9800     | C(4b1)–H(4b1) | 0.9500     |
| C(28)–H(28b)  | 0.9800     | C(4b2)–H(4b2) | 0.9500     |
| C(28)–H(28c)  | 0.9800     | C(4b3)–C(4b4) | 1.356(6)   |
| C(2a1)–C(2m4) | 1.387(6)   | C(4b3)–H(4b3) | 0.9500     |
| C(2a1)–C(2b1) | 1.442(5)   | C(4b4)–H(4b4) | 0.9500     |
| C(2a2)–C(2m1) | 1.398(6)   | C(4b5)–C(4b6) | 1.356(6)   |
| C(2a2)–C(2b2) | 1.430(6)   | C(4b5)–H(4b5) | 0.9500     |
| C(2a3)–C(2m1) | 1.387(6)   | C(4b6)–H(4b6) | 0.9500     |
| C(2a3)–C(2b3) | 1.434(6)   | C(4b7)–C(4b8) | 1.345(5)   |
| C(2a4)–C(2m2) | 1.412(5)   | C(4b7)–H(4b7) | 0.9500     |
| C(2a4)–C(2b4) | 1.431(6)   | C(4b8)–H(4b8) | 0.9500     |
| C(2a5)–C(2m2) | 1.394(6)   | C(4m1)–C(411) | 1.507(6)   |
| C(2a5)–C(2b5) | 1.444(6)   | C(4m2)–C(421) | 1.502(5)   |
| C(2a6)–C(2m3) | 1.385(6)   | C(4m3)–C(431) | 1.503(6)   |
| C(2a6)–C(2b6) | 1.456(6)   | C(4m4)–C(441) | 1.512(6)   |
| C(2a7)–C(2m3) | 1.390(6)   | C(411)–C(416) | 1.392(7)   |
| C(2a7)–C(2b7) | 1.429(6)   | C(411)–C(412) | 1.412(7)   |
| C(2a8)–C(2m4) | 1.408(5)   | C(412)–C(413) | 1.391(7)   |
| C(2a8)–C(2b8) | 1.436(6)   | C(412)–C(417) | 1.497(7)   |

**Table S3.** Continued

| bond          | length (Å) | bond          | length (Å) |
|---------------|------------|---------------|------------|
| C(2b1)–C(2b2) | 1.371(6)   | C(413)–C(414) | 1.363(8)   |
| C(2b1)–H(2b1) | 0.9500     | C(413)–H(413) | 0.9500     |
| C(2b2)–H(2b2) | 0.9500     | C(414)–C(415) | 1.378(9)   |
| C(2b3)–C(2b4) | 1.362(5)   | C(414)–C(418) | 1.505(7)   |
| C(2b3)–H(2b3) | 0.9500     | C(415)–C(416) | 1.402(7)   |
| C(2b4)–H(2b4) | 0.9500     | C(415)–H(415) | 0.9500     |
| C(2b5)–C(2b6) | 1.347(6)   | C(416)–C(419) | 1.503(8)   |
| C(2b5)–H(2b5) | 0.9500     | C(417)–H(4d7) | 0.9800     |
| C(2b6)–H(2b6) | 0.9500     | C(417)–H(4e7) | 0.9800     |
| C(2b7)–C(2b8) | 1.348(6)   | C(417)–H(4f7) | 0.9800     |
| C(2b7)–H(2b7) | 0.9500     | C(418)–H(4d8) | 0.9800     |
| C(2b8)–H(2b8) | 0.9500     | C(418)–H(4e8) | 0.9800     |
| C(2m1)–C(211) | 1.509(5)   | C(418)–H(4f8) | 0.9800     |
| C(2m2)–C(221) | 1.500(6)   | C(419)–H(4d9) | 0.9800     |
| C(2m3)–C(231) | 1.513(6)   | C(419)–H(4e9) | 0.9800     |
| C(2m4)–C(241) | 1.478(6)   | C(419)–H(4f9) | 0.9800     |
| C(211)–C(216) | 1.380(6)   | C(421)–C(426) | 1.397(6)   |
| C(211)–C(212) | 1.406(6)   | C(421)–C(422) | 1.404(6)   |
| C(212)–C(213) | 1.384(6)   | C(422)–C(423) | 1.398(6)   |
| C(212)–C(217) | 1.501(6)   | C(422)–C(427) | 1.503(6)   |
| C(213)–C(214) | 1.389(6)   | C(423)–C(424) | 1.373(6)   |
| C(213)–H(213) | 0.9500     | C(423)–H(423) | 0.9500     |
| C(214)–C(215) | 1.397(6)   | C(424)–C(425) | 1.371(6)   |
| C(214)–C(218) | 1.507(6)   | C(424)–C(428) | 1.527(6)   |
| C(215)–C(216) | 1.401(5)   | C(425)–C(426) | 1.398(6)   |
| C(215)–H(215) | 0.9500     | C(425)–H(425) | 0.9500     |
| C(216)–C(219) | 1.493(6)   | C(426)–C(429) | 1.516(6)   |
| C(217)–H(2d7) | 0.9800     | C(427)–H(4g7) | 0.9800     |
| C(217)–H(2e7) | 0.9800     | C(427)–H(4h7) | 0.9800     |
| C(217)–H(2f7) | 0.9800     | C(427)–H(4i7) | 0.9800     |
| C(218)–H(2d8) | 0.9800     | C(428)–H(4g8) | 0.9800     |
| C(218)–H(2e8) | 0.9800     | C(428)–H(4h8) | 0.9800     |
| C(218)–H(2f8) | 0.9800     | C(428)–H(4i8) | 0.9800     |
| C(219)–H(2d9) | 0.9800     | C(429)–H(4g9) | 0.9800     |

**Table S3.** Continued

| bond          | length (Å) | bond          | length (Å) |
|---------------|------------|---------------|------------|
| C(219)–H(2e9) | 0.9800     | C(429)–H(4h9) | 0.9800     |
| C(219)–H(2f9) | 0.9800     | C(429)–H(4i9) | 0.9800     |
| C(221)–C(222) | 1.394(7)   | C(431)–C(436) | 1.395(6)   |
| C(221)–C(226) | 1.402(6)   | C(431)–C(432) | 1.406(6)   |
| C(222)–C(223) | 1.410(7)   | C(432)–C(433) | 1.396(6)   |
| C(222)–C(227) | 1.519(8)   | C(432)–C(437) | 1.501(7)   |
| C(223)–C(224) | 1.368(8)   | C(433)–C(434) | 1.384(6)   |
| C(223)–H(223) | 0.9500     | C(433)–H(433) | 0.9500     |
| C(224)–C(225) | 1.391(8)   | C(434)–C(435) | 1.393(7)   |
| C(224)–C(228) | 1.496(7)   | C(434)–C(438) | 1.495(6)   |
| C(225)–C(226) | 1.414(7)   | C(435)–C(436) | 1.397(6)   |
| C(225)–H(225) | 0.9500     | C(435)–H(435) | 0.9500     |
| C(226)–C(229) | 1.477(7)   | C(436)–C(439) | 1.501(6)   |
| C(227)–H(2g7) | 0.9800     | C(437)–H(4j7) | 0.9800     |
| C(227)–H(2h7) | 0.9800     | C(437)–H(4k7) | 0.9800     |
| C(227)–H(2i7) | 0.9800     | C(437)–H(4l7) | 0.9800     |
| C(228)–H(2g8) | 0.9800     | C(438)–H(4j8) | 0.9800     |
| C(228)–H(2h8) | 0.9800     | C(438)–H(4k8) | 0.9800     |
| C(228)–H(2i8) | 0.9800     | C(438)–H(4l8) | 0.9800     |
| C(229)–H(2g9) | 0.9800     | C(439)–H(4j9) | 0.9800     |
| C(229)–H(2h9) | 0.9800     | C(439)–H(4k9) | 0.9800     |
| C(229)–H(2i9) | 0.9800     | C(439)–H(4l9) | 0.9800     |
| C(231)–C(236) | 1.398(6)   | C(441)–C(442) | 1.390(6)   |
| C(231)–C(232) | 1.399(6)   | C(441)–C(446) | 1.401(6)   |
| C(232)–C(233) | 1.398(6)   | C(442)–C(443) | 1.394(7)   |
| C(232)–C(237) | 1.528(7)   | C(442)–C(447) | 1.492(7)   |
| C(233)–C(234) | 1.370(7)   | C(443)–C(444) | 1.370(8)   |
| C(233)–H(233) | 0.9500     | C(443)–H(443) | 0.9500     |
| C(234)–C(235) | 1.397(7)   | C(444)–C(445) | 1.386(8)   |
| C(234)–C(238) | 1.491(6)   | C(444)–C(448) | 1.526(7)   |
| C(235)–C(236) | 1.395(6)   | C(445)–C(446) | 1.396(7)   |
| C(235)–H(235) | 0.9500     | C(445)–H(445) | 0.9500     |
| C(236)–C(239) | 1.513(6)   | C(446)–C(449) | 1.479(7)   |
| C(237)–H(2j7) | 0.9800     | C(447)–H(4m7) | 0.9800     |

**Table S3.** Continued

| bond          | length (Å) | bond            | length (Å) |
|---------------|------------|-----------------|------------|
| C(237)–H(2k7) | 0.9800     | C(447)–H(4n7)   | 0.9800     |
| C(237)–H(2l7) | 0.9800     | C(447)–H(4p7)   | 0.9800     |
| C(238)–H(2j8) | 0.9800     | C(448)–H(4m8)   | 0.9800     |
| C(238)–H(2k8) | 0.9800     | C(448)–H(4n8)   | 0.9800     |
| C(238)–H(2l8) | 0.9800     | C(448)–H(4p8)   | 0.9800     |
| C(239)–H(2j9) | 0.9800     | C(449)–H(4m9)   | 0.9800     |
| C(239)–H(2k9) | 0.9800     | C(449)–H(4n9)   | 0.9800     |
| C(239)–H(2l9) | 0.9800     | C(449)–H(4p9)   | 0.9800     |
| C(241)–C(242) | 1.391(6)   | C(1s)–C(6s)     | 1.368(9)   |
| C(241)–C(246) | 1.408(5)   | C(1s)–C(2s)     | 1.422(11)  |
| C(242)–C(243) | 1.391(6)   | C(1s)–C(7s)     | 1.552(12)  |
| C(242)–C(247) | 1.515(6)   | C(2s)–C(3s)     | 1.425(13)  |
| C(243)–C(244) | 1.382(6)   | C(3s)–C(4s)     | 1.479(13)  |
| C(243)–H(243) | 0.9500     | C(4s)–C(5s)     | 1.437(11)  |
| C(244)–C(245) | 1.380(7)   | C(5s)–C(6s)     | 1.481(10)  |
| C(244)–C(248) | 1.518(7)   | Cl(1)–C(9s)     | 1.65(2)    |
| C(245)–C(246) | 1.414(6)   | Cl(1)–C(8s)     | 1.685(16)  |
| C(245)–H(245) | 0.9500     | Cl(2)–C(8s)     | 1.767(16)  |
| C(246)–C(249) | 1.497(6)   | C(9s)–Cl(3)     | 1.725(17)  |
| C(247)–H(2m7) | 0.9800     | N(35s)–C(31s)   | 1.3272     |
| C(247)–H(2n7) | 0.9800     | N(35s)–C(33s)   | 1.3887     |
| C(247)–H(2p7) | 0.9800     | C(31s)–N(36s)   | 1.3703     |
| C(248)–H(2m8) | 0.9800     | C(31s)–C(34s)   | 1.4782     |
| C(248)–H(2n8) | 0.9800     | N(36s)–C(32s)   | 1.3574     |
| C(248)–H(2p8) | 0.9800     | C(32s)–C(33s)   | 1.3557     |
| C(249)–H(2m9) | 0.9800     | C(2os)–O(2s)#1) | 1.498(17)  |
| C(249)–H(2n9) | 0.9800     | C(2os)–O(2s)    | 1.498(17)  |
| C(249)–H(2p9) | 0.9800     | O(2s)–O(2s)#1)  | 1.46(3)    |
| Fe(3)–N(31)   | 2.066(3)   |                 |            |
| Fe(3)–N(33)   | 2.066(3)   |                 |            |

<sup>a</sup>The estimated standard deviations of the least significant digits are given in parentheses.

**Table S4.** Bond Angles for  $[\text{Fe}(\text{TMP})(2\text{-MeHIm})_2]_2 \cdot [\text{Fe}(\text{TMP})(2\text{-MeHIm})]_2$ 

| angle               | degree     | angle                | degree     |
|---------------------|------------|----------------------|------------|
| N(11)–Fe(1)–N(13)   | 179.29(14) | H(2m9)–C(249)–H(2n9) | 109.5      |
| N(11)–Fe(1)–N(12)   | 90.45(13)  | C(246)–C(249)–H(2p9) | 109.5      |
| N(13)–Fe(1)–N(12)   | 89.89(13)  | H(2m9)–C(249)–H(2p9) | 109.5      |
| N(11)–Fe(1)–N(14)   | 89.38(13)  | H(2n9)–C(249)–H(2p9) | 109.5      |
| N(13)–Fe(1)–N(14)   | 90.28(14)  | N(31)–Fe(3)–N(33)    | 158.76(14) |
| N(12)–Fe(1)–N(14)   | 179.76(15) | N(31)–Fe(3)–N(34)    | 88.35(13)  |
| N(11)–Fe(1)–N(15)   | 91.95(13)  | N(33)–Fe(3)–N(34)    | 88.12(13)  |
| N(13)–Fe(1)–N(15)   | 87.44(13)  | N(31)–Fe(3)–N(32)    | 87.98(13)  |
| N(12)–Fe(1)–N(15)   | 88.36(13)  | N(33)–Fe(3)–N(32)    | 88.47(13)  |
| N(14)–Fe(1)–N(15)   | 91.47(13)  | N(34)–Fe(3)–N(32)    | 160.72(15) |
| N(11)–Fe(1)–N(17)   | 88.42(13)  | N(31)–Fe(3)–N(35a)   | 99.72(19)  |
| N(13)–Fe(1)–N(17)   | 92.21(14)  | N(33)–Fe(3)–N(35a)   | 101.25(19) |
| N(12)–Fe(1)–N(17)   | 88.58(13)  | N(34)–Fe(3)–N(35a)   | 108.72(18) |
| N(14)–Fe(1)–N(17)   | 91.59(14)  | N(32)–Fe(3)–N(35a)   | 90.56(18)  |
| N(15)–Fe(1)–N(17)   | 176.93(13) | N(31)–Fe(3)–N(35b)   | 99.1(2)    |
| C(1a1)–N(11)–C(1a2) | 105.6(3)   | N(33)–Fe(3)–N(35b)   | 101.8(2)   |
| C(1a1)–N(11)–Fe(1)  | 127.6(3)   | N(34)–Fe(3)–N(35b)   | 90.0(2)    |
| C(1a2)–N(11)–Fe(1)  | 126.7(3)   | N(32)–Fe(3)–N(35b)   | 109.3(2)   |
| C(1a4)–N(12)–C(1a3) | 105.3(3)   | N(35a)–Fe(3)–N(35b)  | 18.77(19)  |
| C(1a4)–N(12)–Fe(1)  | 127.3(3)   | C(31a)–N(35a)–C(33a) | 106.4      |
| C(1a3)–N(12)–Fe(1)  | 127.4(3)   | C(31a)–N(35a)–Fe(3)  | 127.1(3)   |
| C(1a5)–N(13)–C(1a6) | 106.4(3)   | C(33a)–N(35a)–Fe(3)  | 126.4(3)   |
| C(1a5)–N(13)–Fe(1)  | 127.1(3)   | N(35a)–C(31a)–N(36a) | 108.8      |
| C(1a6)–N(13)–Fe(1)  | 126.4(3)   | N(35a)–C(31a)–C(34a) | 129.6      |
| C(1a8)–N(14)–C(1a7) | 106.2(3)   | N(36a)–C(31a)–C(34a) | 121.6      |
| C(1a8)–N(14)–Fe(1)  | 127.4(3)   | C(32a)–N(36a)–C(31a) | 109.4      |
| C(1a7)–N(14)–Fe(1)  | 126.4(3)   | C(33a)–C(32a)–N(36a) | 105.5      |
| C(11)–N(15)–C(13)   | 105.8(3)   | C(32a)–C(33a)–N(35a) | 109.9      |
| C(11)–N(15)–Fe(1)   | 132.0(3)   | C(31b)–N(35b)–C(33b) | 106.4      |
| C(13)–N(15)–Fe(1)   | 122.2(3)   | C(31b)–N(35b)–Fe(3)  | 127.9(4)   |
| N(15)–C(11)–N(16)   | 109.8(4)   | C(33b)–N(35b)–Fe(3)  | 124.5(4)   |
| N(15)–C(11)–C(14)   | 129.3(4)   | N(35b)–C(31b)–N(36b) | 108.7      |
| N(16)–C(11)–C(14)   | 120.9(4)   | N(35b)–C(31b)–C(34b) | 129.6      |
| C(11)–N(16)–C(12)   | 108.4(3)   | N(36b)–C(31b)–C(34b) | 121.6      |

**Table S4.** Continued

| angle               | degree   | angle                | degree   |
|---------------------|----------|----------------------|----------|
| C(11)–N(16)–H(16n)  | 125.8    | C(32b)–N(36b)–C(31b) | 109.4    |
| C(12)–N(16)–H(16n)  | 125.8    | C(33b)–C(32b)–N(36b) | 105.5    |
| C(13)–C(12)–N(16)   | 105.8(4) | C(32b)–C(33b)–N(35b) | 109.9    |
| C(13)–C(12)–H(12)   | 127.1    | C(3a2)–N(31)–C(3a1)  | 107.3(3) |
| N(16)–C(12)–H(12)   | 127.1    | C(3a2)–N(31)–Fe(3)   | 126.9(3) |
| C(12)–C(13)–N(15)   | 110.2(4) | C(3a1)–N(31)–Fe(3)   | 125.2(3) |
| C(12)–C(13)–H(13)   | 124.9    | C(3a3)–N(32)–C(3a4)  | 106.3(3) |
| N(15)–C(13)–H(13)   | 124.9    | C(3a3)–N(32)–Fe(3)   | 127.3(3) |
| C(11)–C(14)–H(14a)  | 109.5    | C(3a4)–N(32)–Fe(3)   | 125.9(3) |
| C(11)–C(14)–H(14b)  | 109.5    | C(3a6)–N(33)–C(3a5)  | 106.9(3) |
| H(14a)–C(14)–H(14b) | 109.5    | C(3a6)–N(33)–Fe(3)   | 126.7(3) |
| C(11)–C(14)–H(14c)  | 109.5    | C(3a5)–N(33)–Fe(3)   | 125.9(3) |
| H(14a)–C(14)–H(14c) | 109.5    | C(3a7)–N(34)–C(3a8)  | 106.1(3) |
| H(14b)–C(14)–H(14c) | 109.5    | C(3a7)–N(34)–Fe(3)   | 126.7(3) |
| C(15)–N(17)–C(17)   | 106.4(4) | C(3a8)–N(34)–Fe(3)   | 126.8(3) |
| C(15)–N(17)–Fe(1)   | 133.0(3) | N(31)–C(3a1)–C(3m4)  | 127.6(4) |
| C(17)–N(17)–Fe(1)   | 120.6(3) | N(31)–C(3a1)–C(3b1)  | 108.5(3) |
| N(17)–C(15)–N(18)   | 108.8(4) | C(3m4)–C(3a1)–C(3b1) | 123.9(4) |
| N(17)–C(15)–C(18)   | 127.4(4) | N(31)–C(3a2)–C(3m1)  | 126.0(4) |
| N(18)–C(15)–C(18)   | 123.8(4) | N(31)–C(3a2)–C(3b2)  | 109.7(3) |
| C(16)–N(18)–C(15)   | 109.4(4) | C(3m1)–C(3a2)–C(3b2) | 124.2(4) |
| C(16)–N(18)–H(18n)  | 125.3    | N(32)–C(3a3)–C(3m1)  | 124.5(4) |
| C(15)–N(18)–H(18n)  | 125.3    | N(32)–C(3a3)–C(3b3)  | 109.9(4) |
| C(17)–C(16)–N(18)   | 105.8(4) | C(3m1)–C(3a3)–C(3b3) | 125.7(4) |
| C(17)–C(16)–H(16)   | 127.1    | N(32)–C(3a4)–C(3m2)  | 125.7(4) |
| N(18)–C(16)–H(16)   | 127.1    | N(32)–C(3a4)–C(3b4)  | 109.3(4) |
| C(16)–C(17)–N(17)   | 109.6(4) | C(3m2)–C(3a4)–C(3b4) | 125.0(4) |
| C(16)–C(17)–H(17)   | 125.2    | N(33)–C(3a5)–C(3m2)  | 126.0(4) |
| N(17)–C(17)–H(17)   | 125.2    | N(33)–C(3a5)–C(3b5)  | 109.3(3) |
| C(15)–C(18)–H(18a)  | 109.5    | C(3m2)–C(3a5)–C(3b5) | 124.6(4) |
| C(15)–C(18)–H(18b)  | 109.5    | N(33)–C(3a6)–C(3m3)  | 126.7(4) |
| H(18a)–C(18)–H(18b) | 109.5    | N(33)–C(3a6)–C(3b6)  | 109.2(3) |
| C(15)–C(18)–H(18c)  | 109.5    | C(3m3)–C(3a6)–C(3b6) | 124.1(3) |
| H(18a)–C(18)–H(18c) | 109.5    | N(34)–C(3a7)–C(3m3)  | 125.9(4) |

**Table S4.** Continued

| angle                | degree   | angle                | degree   |
|----------------------|----------|----------------------|----------|
| H(18b)–C(18)–H(18c)  | 109.5    | N(34)–C(3a7)–C(3b7)  | 109.8(4) |
| N(11)–C(1a1)–C(1m4)  | 124.3(4) | C(3m3)–C(3a7)–C(3b7) | 124.3(4) |
| N(11)–C(1a1)–C(1b1)  | 109.7(3) | N(34)–C(3a8)–C(3m4)  | 125.2(4) |
| C(1m4)–C(1a1)–C(1b1) | 125.8(4) | N(34)–C(3a8)–C(3b8)  | 109.8(4) |
| N(11)–C(1a2)–C(1m1)  | 125.2(4) | C(3m4)–C(3a8)–C(3b8) | 125.0(4) |
| N(11)–C(1a2)–C(1b2)  | 109.3(3) | C(3b2)–C(3b1)–C(3a1) | 107.2(4) |
| C(1m1)–C(1a2)–C(1b2) | 125.2(4) | C(3b2)–C(3b1)–H(3b1) | 126.4    |
| N(12)–C(1a3)–C(1m1)  | 124.3(4) | C(3a1)–C(3b1)–H(3b1) | 126.4    |
| N(12)–C(1a3)–C(1b3)  | 110.4(3) | C(3b1)–C(3b2)–C(3a2) | 107.3(4) |
| C(1m1)–C(1a3)–C(1b3) | 125.1(4) | C(3b1)–C(3b2)–H(3b2) | 126.4    |
| N(12)–C(1a4)–C(1m2)  | 125.3(3) | C(3a2)–C(3b2)–H(3b2) | 126.4    |
| N(12)–C(1a4)–C(1b4)  | 110.5(3) | C(3b4)–C(3b3)–C(3a3) | 106.9(4) |
| C(1m2)–C(1a4)–C(1b4) | 123.8(4) | C(3b4)–C(3b3)–H(3b3) | 126.6    |
| N(13)–C(1a5)–C(1m2)  | 126.3(4) | C(3a3)–C(3b3)–H(3b3) | 126.6    |
| N(13)–C(1a5)–C(1b5)  | 109.2(3) | C(3b3)–C(3b4)–C(3a4) | 107.7(4) |
| C(1m2)–C(1a5)–C(1b5) | 124.0(4) | C(3b3)–C(3b4)–H(3b4) | 126.1    |
| N(13)–C(1a6)–C(1m3)  | 124.9(4) | C(3a4)–C(3b4)–H(3b4) | 126.1    |
| N(13)–C(1a6)–C(1b6)  | 109.4(3) | C(3b6)–C(3b5)–C(3a5) | 107.3(4) |
| C(1m3)–C(1a6)–C(1b6) | 125.5(4) | C(3b6)–C(3b5)–H(3b5) | 126.3    |
| N(14)–C(1a7)–C(1m3)  | 124.7(4) | C(3a5)–C(3b5)–H(3b5) | 126.3    |
| N(14)–C(1a7)–C(1b7)  | 110.1(4) | C(3b5)–C(3b6)–C(3a6) | 107.2(4) |
| C(1m3)–C(1a7)–C(1b7) | 124.8(4) | C(3b5)–C(3b6)–H(3b6) | 126.4    |
| N(14)–C(1a8)–C(1m4)  | 124.2(4) | C(3a6)–C(3b6)–H(3b6) | 126.4    |
| N(14)–C(1a8)–C(1b8)  | 109.8(4) | C(3b8)–C(3b7)–C(3a7) | 107.3(3) |
| C(1m4)–C(1a8)–C(1b8) | 125.0(4) | C(3b8)–C(3b7)–H(3b7) | 126.4    |
| C(1b2)–C(1b1)–C(1a1) | 107.9(4) | C(3a7)–C(3b7)–H(3b7) | 126.4    |
| C(1b2)–C(1b1)–H(1b1) | 126.1    | C(3b7)–C(3b8)–C(3a8) | 107.1(4) |
| C(1a1)–C(1b1)–H(1b1) | 126.1    | C(3b7)–C(3b8)–H(3b8) | 126.5    |
| C(1b1)–C(1b2)–C(1a2) | 107.5(4) | C(3a8)–C(3b8)–H(3b8) | 126.5    |
| C(1b1)–C(1b2)–H(1b2) | 126.3    | C(3a2)–C(3m1)–C(3a3) | 125.6(4) |
| C(1a2)–C(1b2)–H(1b2) | 126.3    | C(3a2)–C(3m1)–C(311) | 116.5(4) |
| C(1b4)–C(1b3)–C(1a3) | 107.0(4) | C(3a3)–C(3m1)–C(311) | 117.7(4) |
| C(1b4)–C(1b3)–H(1b3) | 126.5    | C(3a4)–C(3m2)–C(3a5) | 125.2(4) |
| C(1a3)–C(1b3)–H(1b3) | 126.5    | C(3a4)–C(3m2)–C(321) | 118.8(3) |

**Table S4.** Continued

| angle                | degree   | angle                | degree   |
|----------------------|----------|----------------------|----------|
| C(1b3)–C(1b4)–C(1a4) | 106.8(4) | C(3a5)–C(3m2)–C(321) | 115.9(3) |
| C(1b3)–C(1b4)–H(1b4) | 126.6    | C(3a7)–C(3m3)–C(3a6) | 124.3(4) |
| C(1a4)–C(1b4)–H(1b4) | 126.6    | C(3a7)–C(3m3)–C(331) | 118.7(3) |
| C(1b6)–C(1b5)–C(1a5) | 107.3(4) | C(3a6)–C(3m3)–C(331) | 116.8(3) |
| C(1b6)–C(1b5)–H(1b5) | 126.4    | C(3a1)–C(3m4)–C(3a8) | 124.1(4) |
| C(1a5)–C(1b5)–H(1b5) | 126.4    | C(3a1)–C(3m4)–C(341) | 118.2(4) |
| C(1b5)–C(1b6)–C(1a6) | 107.6(4) | C(3a8)–C(3m4)–C(341) | 117.7(3) |
| C(1b5)–C(1b6)–H(1b6) | 126.2    | C(316)–C(311)–C(312) | 120.0(4) |
| C(1a6)–C(1b6)–H(1b6) | 126.2    | C(316)–C(311)–C(3m1) | 120.6(4) |
| C(1b8)–C(1b7)–C(1a7) | 106.7(4) | C(312)–C(311)–C(3m1) | 119.4(4) |
| C(1b8)–C(1b7)–H(1b7) | 126.7    | C(313)–C(312)–C(311) | 118.9(4) |
| C(1a7)–C(1b7)–H(1b7) | 126.7    | C(313)–C(312)–C(317) | 121.1(5) |
| C(1b7)–C(1b8)–C(1a8) | 107.2(4) | C(311)–C(312)–C(317) | 119.9(4) |
| C(1b7)–C(1b8)–H(1b8) | 126.4    | C(312)–C(313)–C(314) | 122.0(4) |
| C(1a8)–C(1b8)–H(1b8) | 126.4    | C(312)–C(313)–H(313) | 119.0    |
| C(1a2)–C(1m1)–C(1a3) | 123.7(4) | C(314)–C(313)–H(313) | 119.0    |
| C(1a2)–C(1m1)–C(111) | 117.1(3) | C(315)–C(314)–C(313) | 117.8(4) |
| C(1a3)–C(1m1)–C(111) | 119.0(3) | C(315)–C(314)–C(318) | 120.4(4) |
| C(1a5)–C(1m2)–C(1a4) | 121.9(4) | C(313)–C(314)–C(318) | 121.8(4) |
| C(1a5)–C(1m2)–C(121) | 118.9(3) | C(314)–C(315)–C(316) | 121.4(4) |
| C(1a4)–C(1m2)–C(121) | 119.0(3) | C(314)–C(315)–H(315) | 119.3    |
| C(1a6)–C(1m3)–C(1a7) | 123.6(4) | C(316)–C(315)–H(315) | 119.3    |
| C(1a6)–C(1m3)–C(131) | 117.6(4) | C(315)–C(316)–C(311) | 119.8(4) |
| C(1a7)–C(1m3)–C(131) | 118.8(3) | C(315)–C(316)–C(319) | 119.8(4) |
| C(1a1)–C(1m4)–C(1a8) | 123.9(4) | C(311)–C(316)–C(319) | 120.4(4) |
| C(1a1)–C(1m4)–C(141) | 116.1(4) | C(312)–C(317)–H(3d7) | 109.5    |
| C(1a8)–C(1m4)–C(141) | 119.9(4) | C(312)–C(317)–H(3e7) | 109.5    |
| C(116)–C(111)–C(112) | 119.4(4) | H(3d7)–C(317)–H(3e7) | 109.5    |
| C(116)–C(111)–C(1m1) | 120.8(3) | C(312)–C(317)–H(3f7) | 109.5    |
| C(112)–C(111)–C(1m1) | 119.7(4) | H(3d7)–C(317)–H(3f7) | 109.5    |
| C(113)–C(112)–C(111) | 119.8(4) | H(3e7)–C(317)–H(3f7) | 109.5    |
| C(113)–C(112)–C(117) | 120.2(4) | C(314)–C(318)–H(3d8) | 109.5    |
| C(111)–C(112)–C(117) | 120.0(4) | C(314)–C(318)–H(3e8) | 109.5    |
| C(112)–C(113)–C(114) | 121.2(4) | H(3d8)–C(318)–H(3e8) | 109.5    |



**Table S4.** Continued

| angle                | degree   | angle                | degree   |
|----------------------|----------|----------------------|----------|
| C(112)–C(113)–H(113) | 119.4    | C(314)–C(318)–H(3f8) | 109.5    |
| C(114)–C(113)–H(113) | 119.4    | H(3d8)–C(318)–H(3f8) | 109.5    |
| C(115)–C(114)–C(113) | 118.4(4) | H(3e8)–C(318)–H(3f8) | 109.5    |
| C(115)–C(114)–C(118) | 120.8(4) | C(316)–C(319)–H(3d9) | 109.5    |
| C(113)–C(114)–C(118) | 120.8(4) | C(316)–C(319)–H(3e9) | 109.5    |
| C(114)–C(115)–C(116) | 122.2(4) | H(3d9)–C(319)–H(3e9) | 109.5    |
| C(114)–C(115)–H(115) | 118.9    | C(316)–C(319)–H(3f9) | 109.5    |
| C(116)–C(115)–H(115) | 118.9    | H(3d9)–C(319)–H(3f9) | 109.5    |
| C(115)–C(116)–C(111) | 119.0(4) | H(3e9)–C(319)–H(3f9) | 109.5    |
| C(115)–C(116)–C(119) | 120.5(4) | C(326)–C(321)–C(322) | 120.2(4) |
| C(111)–C(116)–C(119) | 120.5(4) | C(326)–C(321)–C(3m2) | 121.0(4) |
| C(112)–C(117)–H(1d7) | 109.5    | C(322)–C(321)–C(3m2) | 118.7(4) |
| C(112)–C(117)–H(1e7) | 109.5    | C(323)–C(322)–C(321) | 120.2(5) |
| H(1d7)–C(117)–H(1e7) | 109.5    | C(323)–C(322)–C(327) | 119.0(5) |
| C(112)–C(117)–H(1f7) | 109.5    | C(321)–C(322)–C(327) | 120.8(4) |
| H(1d7)–C(117)–H(1f7) | 109.5    | C(324)–C(323)–C(322) | 120.8(5) |
| H(1e7)–C(117)–H(1f7) | 109.5    | C(324)–C(323)–H(323) | 119.6    |
| C(114)–C(118)–H(1d8) | 109.5    | C(322)–C(323)–H(323) | 119.6    |
| C(114)–C(118)–H(1e8) | 109.5    | C(323)–C(324)–C(325) | 118.3(5) |
| H(1d8)–C(118)–H(1e8) | 109.5    | C(323)–C(324)–C(328) | 118.4(6) |
| C(114)–C(118)–H(1f8) | 109.5    | C(325)–C(324)–C(328) | 123.3(6) |
| H(1d8)–C(118)–H(1f8) | 109.5    | C(324)–C(325)–C(326) | 123.1(5) |
| H(1e8)–C(118)–H(1f8) | 109.5    | C(324)–C(325)–H(325) | 118.4    |
| C(116)–C(119)–H(1d9) | 109.5    | C(326)–C(325)–H(325) | 118.4    |
| C(116)–C(119)–H(1e9) | 109.5    | C(321)–C(326)–C(325) | 117.3(5) |
| H(1d9)–C(119)–H(1e9) | 109.5    | C(321)–C(326)–C(329) | 122.6(4) |
| C(116)–C(119)–H(1f9) | 109.5    | C(325)–C(326)–C(329) | 120.1(4) |
| H(1d9)–C(119)–H(1f9) | 109.5    | C(322)–C(327)–H(3g7) | 109.5    |
| H(1e9)–C(119)–H(1f9) | 109.5    | C(322)–C(327)–H(3h7) | 109.5    |
| C(126)–C(121)–C(122) | 118.6(4) | H(3g7)–C(327)–H(3h7) | 109.5    |
| C(126)–C(121)–C(1m2) | 119.9(4) | C(322)–C(327)–H(3i7) | 109.5    |
| C(122)–C(121)–C(1m2) | 121.4(3) | H(3g7)–C(327)–H(3i7) | 109.5    |
| C(123)–C(122)–C(121) | 119.4(4) | H(3h7)–C(327)–H(3i7) | 109.5    |
| C(123)–C(122)–C(127) | 121.0(4) | C(324)–C(328)–H(3g8) | 109.5    |

**Table S4.** Continued

| angle                | degree   | angle                | degree   |
|----------------------|----------|----------------------|----------|
| C(121)–C(122)–C(127) | 119.4(4) | C(324)–C(328)–H(3h8) | 109.5    |
| C(124)–C(123)–C(122) | 122.7(5) | H(3g8)–C(328)–H(3h8) | 109.5    |
| C(124)–C(123)–H(123) | 118.7    | C(324)–C(328)–H(3i8) | 109.5    |
| C(122)–C(123)–H(123) | 118.7    | H(3g8)–C(328)–H(3i8) | 109.5    |
| C(123)–C(124)–C(125) | 118.4(4) | H(3h8)–C(328)–H(3i8) | 109.5    |
| C(123)–C(124)–C(128) | 121.2(5) | C(326)–C(329)–H(3g9) | 109.5    |
| C(125)–C(124)–C(128) | 120.4(4) | C(326)–C(329)–H(3h9) | 109.5    |
| C(126)–C(125)–C(124) | 121.6(4) | H(3g9)–C(329)–H(3h9) | 109.5    |
| C(126)–C(125)–H(125) | 119.2    | C(326)–C(329)–H(3i9) | 109.5    |
| C(124)–C(125)–H(125) | 119.2    | H(3g9)–C(329)–H(3i9) | 109.5    |
| C(125)–C(126)–C(121) | 119.2(4) | H(3h9)–C(329)–H(3i9) | 109.5    |
| C(125)–C(126)–C(129) | 119.6(4) | C(336)–C(331)–C(332) | 120.1(4) |
| C(121)–C(126)–C(129) | 121.1(4) | C(336)–C(331)–C(3m3) | 119.1(4) |
| C(122)–C(127)–H(1g7) | 109.5    | C(332)–C(331)–C(3m3) | 120.7(4) |
| C(122)–C(127)–H(1h7) | 109.5    | C(333)–C(332)–C(331) | 118.9(4) |
| H(1g7)–C(127)–H(1h7) | 109.5    | C(333)–C(332)–C(337) | 119.6(4) |
| C(122)–C(127)–H(1i7) | 109.5    | C(331)–C(332)–C(337) | 121.5(4) |
| H(1g7)–C(127)–H(1i7) | 109.5    | C(334)–C(333)–C(332) | 121.7(4) |
| H(1h7)–C(127)–H(1i7) | 109.5    | C(334)–C(333)–H(333) | 119.2    |
| C(124)–C(128)–H(1g8) | 109.5    | C(332)–C(333)–H(333) | 119.2    |
| C(124)–C(128)–H(1h8) | 109.5    | C(335)–C(334)–C(333) | 118.8(4) |
| H(1g8)–C(128)–H(1h8) | 109.5    | C(335)–C(334)–C(338) | 120.3(4) |
| C(124)–C(128)–H(1i8) | 109.5    | C(333)–C(334)–C(338) | 120.8(4) |
| H(1g8)–C(128)–H(1i8) | 109.5    | C(334)–C(335)–C(336) | 121.7(4) |
| H(1h8)–C(128)–H(1i8) | 109.5    | C(334)–C(335)–H(335) | 119.1    |
| C(126)–C(129)–H(1g9) | 109.5    | C(336)–C(335)–H(335) | 119.1    |
| C(126)–C(129)–H(1h9) | 109.5    | C(335)–C(336)–C(331) | 118.7(4) |
| H(1g9)–C(129)–H(1h9) | 109.5    | C(335)–C(336)–C(339) | 120.6(4) |
| C(126)–C(129)–H(1i9) | 109.5    | C(331)–C(336)–C(339) | 120.7(4) |
| H(1g9)–C(129)–H(1i9) | 109.5    | C(332)–C(337)–H(3j7) | 109.5    |
| H(1h9)–C(129)–H(1i9) | 109.5    | C(332)–C(337)–H(3k7) | 109.5    |
| C(132)–C(131)–C(136) | 119.9(4) | H(3j7)–C(337)–H(3k7) | 109.5    |
| C(132)–C(131)–C(1m3) | 118.5(3) | C(332)–C(337)–H(3l7) | 109.5    |
| C(136)–C(131)–C(1m3) | 121.6(4) | H(3j7)–C(337)–H(3l7) | 109.5    |

**Table S4.** Continued

| angle                | degree   | angle                | degree   |
|----------------------|----------|----------------------|----------|
| C(133)–C(132)–C(131) | 119.8(4) | H(3k7)–C(337)–H(3l7) | 109.5    |
| C(133)–C(132)–C(137) | 119.7(4) | C(334)–C(338)–H(3j8) | 109.5    |
| C(131)–C(132)–C(137) | 120.5(4) | C(334)–C(338)–H(3k8) | 109.5    |
| C(132)–C(133)–C(134) | 121.0(4) | H(3j8)–C(338)–H(3k8) | 109.5    |
| C(132)–C(133)–H(133) | 119.5    | C(334)–C(338)–H(3l8) | 109.5    |
| C(134)–C(133)–H(133) | 119.5    | H(3j8)–C(338)–H(3l8) | 109.5    |
| C(135)–C(134)–C(133) | 118.2(4) | H(3k8)–C(338)–H(3l8) | 109.5    |
| C(135)–C(134)–C(138) | 120.9(4) | C(336)–C(339)–H(3j9) | 109.5    |
| C(133)–C(134)–C(138) | 120.9(4) | C(336)–C(339)–H(3k9) | 109.5    |
| C(134)–C(135)–C(136) | 122.8(4) | H(3j9)–C(339)–H(3k9) | 109.5    |
| C(134)–C(135)–H(135) | 118.6    | C(336)–C(339)–H(3l9) | 109.5    |
| C(136)–C(135)–H(135) | 118.6    | H(3j9)–C(339)–H(3l9) | 109.5    |
| C(135)–C(136)–C(131) | 118.3(4) | H(3k9)–C(339)–H(3l9) | 109.5    |
| C(135)–C(136)–C(139) | 120.9(4) | C(342)–C(341)–C(346) | 119.7(4) |
| C(131)–C(136)–C(139) | 120.9(4) | C(342)–C(341)–C(3m4) | 120.7(4) |
| C(132)–C(137)–H(1j7) | 109.5    | C(346)–C(341)–C(3m4) | 119.6(4) |
| C(132)–C(137)–H(1k7) | 109.5    | C(341)–C(342)–C(343) | 119.6(5) |
| H(1j7)–C(137)–H(1k7) | 109.5    | C(341)–C(342)–C(347) | 120.8(4) |
| C(132)–C(137)–H(1l7) | 109.5    | C(343)–C(342)–C(347) | 119.6(5) |
| H(1j7)–C(137)–H(1l7) | 109.5    | C(344)–C(343)–C(342) | 122.0(5) |
| H(1k7)–C(137)–H(1l7) | 109.5    | C(344)–C(343)–H(343) | 119.0    |
| C(134)–C(138)–H(1j8) | 109.5    | C(342)–C(343)–H(343) | 119.0    |
| C(134)–C(138)–H(1k8) | 109.5    | C(343)–C(344)–C(345) | 118.7(4) |
| H(1j8)–C(138)–H(1k8) | 109.5    | C(343)–C(344)–C(348) | 122.5(6) |
| C(134)–C(138)–H(1l8) | 109.5    | C(345)–C(344)–C(348) | 118.9(5) |
| H(1j8)–C(138)–H(1l8) | 109.5    | C(344)–C(345)–C(346) | 121.1(5) |
| H(1k8)–C(138)–H(1l8) | 109.5    | C(344)–C(345)–H(345) | 119.5    |
| C(136)–C(139)–H(1j9) | 109.5    | C(346)–C(345)–H(345) | 119.5    |
| C(136)–C(139)–H(1k9) | 109.5    | C(341)–C(346)–C(345) | 119.0(5) |
| H(1j9)–C(139)–H(1k9) | 109.5    | C(341)–C(346)–C(349) | 121.8(4) |
| C(136)–C(139)–H(1l9) | 109.5    | C(345)–C(346)–C(349) | 119.2(4) |
| H(1j9)–C(139)–H(1l9) | 109.5    | C(342)–C(347)–H(3m7) | 109.5    |
| H(1k9)–C(139)–H(1l9) | 109.5    | C(342)–C(347)–H(3n7) | 109.5    |
| C(142)–C(141)–C(146) | 119.6(4) | H(3m7)–C(347)–H(3n7) | 109.5    |

**Table S4.** Continued

| angle                | degree   | angle                | degree     |
|----------------------|----------|----------------------|------------|
| C(142)–C(141)–C(1m4) | 121.1(4) | C(342)–C(347)–H(3p7) | 109.5      |
| C(146)–C(141)–C(1m4) | 119.2(4) | H(3m7)–C(347)–H(3p7) | 109.5      |
| C(143)–C(142)–C(141) | 118.4(5) | H(3n7)–C(347)–H(3p7) | 109.5      |
| C(143)–C(142)–C(147) | 120.7(5) | C(344)–C(348)–H(3m8) | 109.5      |
| C(141)–C(142)–C(147) | 120.9(5) | C(344)–C(348)–H(3n8) | 109.5      |
| C(144)–C(143)–C(142) | 122.5(6) | H(3m8)–C(348)–H(3n8) | 109.5      |
| C(144)–C(143)–H(143) | 118.7    | C(344)–C(348)–H(3p8) | 109.5      |
| C(142)–C(143)–H(143) | 118.7    | H(3m8)–C(348)–H(3p8) | 109.5      |
| C(143)–C(144)–C(145) | 118.2(5) | H(3n8)–C(348)–H(3p8) | 109.5      |
| C(143)–C(144)–C(148) | 121.1(6) | C(346)–C(349)–H(3m9) | 109.5      |
| C(145)–C(144)–C(148) | 120.6(6) | C(346)–C(349)–H(3n9) | 109.5      |
| C(146)–C(145)–C(144) | 122.1(6) | H(3m9)–C(349)–H(3n9) | 109.5      |
| C(146)–C(145)–H(145) | 119.0    | C(346)–C(349)–H(3l9) | 109.5      |
| C(144)–C(145)–H(145) | 119.0    | H(3m9)–C(349)–H(3l9) | 109.5      |
| C(145)–C(146)–C(141) | 119.2(5) | H(3n9)–C(349)–H(3l9) | 109.5      |
| C(145)–C(146)–C(149) | 120.9(5) | N(44)–Fe(4a)–N(42)   | 156.96(15) |
| C(141)–C(146)–C(149) | 120.0(4) | N(44)–Fe(4a)–N(41)   | 88.32(14)  |
| C(142)–C(147)–H(1m7) | 109.5    | N(42)–Fe(4a)–N(41)   | 88.20(14)  |
| C(142)–C(147)–H(1n7) | 109.5    | N(44)–Fe(4a)–N(43)   | 87.56(13)  |
| H(1m7)–C(147)–H(1n7) | 109.5    | N(42)–Fe(4a)–N(43)   | 87.58(13)  |
| C(142)–C(147)–H(1p7) | 109.5    | N(41)–Fe(4a)–N(43)   | 159.02(16) |
| H(1m7)–C(147)–H(1p7) | 109.5    | N(44)–Fe(4a)–N(45a)  | 104.01(17) |
| H(1n7)–C(147)–H(1p7) | 109.5    | N(42)–Fe(4a)–N(45a)  | 98.92(17)  |
| C(144)–C(148)–H(1m8) | 109.5    | N(41)–Fe(4a)–N(45a)  | 104.38(15) |
| C(144)–C(148)–H(1n8) | 109.5    | N(43)–Fe(4a)–N(45a)  | 96.58(14)  |
| H(1m8)–C(148)–H(1n8) | 109.5    | C(41a)–N(45a)–C(43a) | 106.4      |
| C(144)–C(148)–H(1p8) | 109.5    | C(41a)–N(45a)–Fe(4a) | 132.1(2)   |
| H(1m8)–C(148)–H(1p8) | 109.5    | C(43a)–N(45a)–Fe(4a) | 120.3(2)   |
| H(1n8)–C(148)–H(1p8) | 109.5    | N(45a)–C(41a)–N(46a) | 108.7      |
| C(146)–C(149)–H(1m9) | 109.5    | N(45a)–C(41a)–C(44a) | 129.6      |
| C(146)–C(149)–H(1n9) | 109.5    | N(46a)–C(41a)–C(44a) | 121.6      |
| H(1m9)–C(149)–H(1n9) | 109.5    | C(42a)–N(46a)–C(41a) | 109.4      |
| C(146)–C(149)–H(1p9) | 109.5    | C(43a)–C(42a)–N(46a) | 105.5      |
| H(1m9)–C(149)–H(1p9) | 109.5    | C(42a)–C(43a)–N(45a) | 110.0      |

**Table S4.** Continued

| angle                | degree     | angle                | degree     |
|----------------------|------------|----------------------|------------|
| H(1n9)–C(149)–H(1p9) | 109.5      | N(42)–Fe(4b)–N(44)   | 155.14(19) |
| N(24)–Fe(2)–N(22)    | 179.68(15) | N(42)–Fe(4b)–N(43)   | 88.06(15)  |
| N(24)–Fe(2)–N(23)    | 90.54(13)  | N(44)–Fe(4b)–N(43)   | 87.75(15)  |
| N(22)–Fe(2)–N(23)    | 89.27(13)  | N(42)–Fe(4b)–N(45b)  | 101.9(4)   |
| N(24)–Fe(2)–N(21)    | 89.37(13)  | N(44)–Fe(4b)–N(45b)  | 102.9(4)   |
| N(22)–Fe(2)–N(21)    | 90.82(13)  | N(43)–Fe(4b)–N(45b)  | 97.1(3)    |
| N(23)–Fe(2)–N(21)    | 179.52(15) | N(42)–Fe(4b)–N(41)   | 86.61(15)  |
| N(24)–Fe(2)–N(27)    | 87.31(14)  | N(44)–Fe(4b)–N(41)   | 86.45(15)  |
| N(22)–Fe(2)–N(27)    | 92.44(14)  | N(43)–Fe(4b)–N(41)   | 153.87(19) |
| N(23)–Fe(2)–N(27)    | 91.87(14)  | N(45b)–Fe(4b)–N(41)  | 109.0(3)   |
| N(21)–Fe(2)–N(27)    | 87.65(13)  | C(41b)–N(45b)–C(43b) | 106.4      |
| N(24)–Fe(2)–N(25)    | 90.63(14)  | C(41b)–N(45b)–Fe(4b) | 129.8(5)   |
| N(22)–Fe(2)–N(25)    | 89.64(14)  | C(43b)–N(45b)–Fe(4b) | 123.8(5)   |
| N(23)–Fe(2)–N(25)    | 93.15(14)  | N(45b)–C(41b)–N(46b) | 108.8      |
| N(21)–Fe(2)–N(25)    | 87.33(14)  | N(45b)–C(41b)–C(44b) | 129.6      |
| N(27)–Fe(2)–N(25)    | 174.60(14) | N(46b)–C(41b)–C(44b) | 121.6      |
| C(2a2)–N(21)–C(2a1)  | 105.7(3)   | C(42b)–N(46b)–C(41b) | 109.4      |
| C(2a2)–N(21)–Fe(2)   | 126.8(3)   | C(43b)–C(42b)–N(46b) | 105.5      |
| C(2a1)–N(21)–Fe(2)   | 127.5(3)   | C(42b)–C(43b)–N(45b) | 109.9      |
| C(2a4)–N(22)–C(2a3)  | 104.9(3)   | Cl(4)–C(10s)–Cl(5)   | 111.4(15)  |
| C(2a4)–N(22)–Fe(2)   | 128.5(2)   | C(4a1)–N(41)–C(4a2)  | 106.6(3)   |
| C(2a3)–N(22)–Fe(2)   | 126.6(3)   | C(4a1)–N(41)–Fe(4a)  | 126.2(3)   |
| C(2a6)–N(23)–C(2a5)  | 105.9(3)   | C(4a2)–N(41)–Fe(4a)  | 126.7(3)   |
| C(2a6)–N(23)–Fe(2)   | 126.0(3)   | C(4a1)–N(41)–Fe(4b)  | 125.5(3)   |
| C(2a5)–N(23)–Fe(2)   | 128.0(3)   | C(4a2)–N(41)–Fe(4b)  | 124.2(3)   |
| C(2a8)–N(24)–C(2a7)  | 105.6(3)   | Fe(4a)–N(41)–Fe(4b)  | 23.49(7)   |
| C(2a8)–N(24)–Fe(2)   | 128.1(3)   | C(4a3)–N(42)–C(4a4)  | 106.5(3)   |
| C(2a7)–N(24)–Fe(2)   | 126.2(3)   | C(4a3)–N(42)–Fe(4a)  | 126.0(3)   |
| C(21)–N(25)–C(23)    | 106.5(4)   | C(4a4)–N(42)–Fe(4a)  | 126.1(3)   |
| C(21)–N(25)–Fe(2)    | 133.7(3)   | C(4a3)–N(42)–Fe(4b)  | 125.8(3)   |
| C(23)–N(25)–Fe(2)    | 119.2(3)   | C(4a4)–N(42)–Fe(4b)  | 125.4(3)   |
| N(25)–C(21)–N(26)    | 108.7(4)   | Fe(4a)–N(42)–Fe(4b)  | 23.97(7)   |
| N(25)–C(21)–C(24)    | 127.2(5)   | C(4a6)–N(43)–C(4a5)  | 106.7(3)   |
| N(26)–C(21)–C(24)    | 124.0(4)   | C(4a6)–N(43)–Fe(4b)  | 124.8(3)   |

**Table S4.** Continued

| angle               | degree   | angle                | degree   |
|---------------------|----------|----------------------|----------|
| C(21)–N(26)–C(22)   | 109.1(4) | C(4a5)–N(43)–Fe(4b)  | 125.5(3) |
| C(21)–N(26)–H(26n)  | 125.4    | C(4a6)–N(43)–Fe(4a)  | 126.5(3) |
| C(22)–N(26)–H(26n)  | 125.4    | C(4a5)–N(43)–Fe(4a)  | 125.8(3) |
| C(23)–C(22)–N(26)   | 105.7(5) | Fe(4b)–N(43)–Fe(4a)  | 23.62(7) |
| C(23)–C(22)–H(22)   | 127.1    | C(4a8)–N(44)–C(4a7)  | 106.5(3) |
| N(26)–C(22)–H(22)   | 127.1    | C(4a8)–N(44)–Fe(4a)  | 125.3(3) |
| C(22)–C(23)–N(25)   | 109.9(5) | C(4a7)–N(44)–Fe(4a)  | 127.5(3) |
| C(22)–C(23)–H(23)   | 125.1    | C(4a8)–N(44)–Fe(4b)  | 126.1(3) |
| N(25)–C(23)–H(23)   | 125.1    | C(4a7)–N(44)–Fe(4b)  | 124.0(3) |
| C(21)–C(24)–H(24a)  | 109.5    | Fe(4a)–N(44)–Fe(4b)  | 23.93(7) |
| C(21)–C(24)–H(24b)  | 109.5    | N(41)–C(4a1)–C(4m4)  | 125.0(4) |
| H(24a)–C(24)–H(24b) | 109.5    | N(41)–C(4a1)–C(4b1)  | 109.8(4) |
| C(21)–C(24)–H(24c)  | 109.5    | C(4m4)–C(4a1)–C(4b1) | 125.2(4) |
| H(24a)–C(24)–H(24c) | 109.5    | N(41)–C(4a2)–C(4m1)  | 125.4(4) |
| H(24b)–C(24)–H(24c) | 109.5    | N(41)–C(4a2)–C(4b2)  | 109.1(4) |
| C(25)–N(27)–C(27)   | 105.2(3) | C(4m1)–C(4a2)–C(4b2) | 125.5(4) |
| C(25)–N(27)–Fe(2)   | 133.2(3) | N(42)–C(4a3)–C(4m1)  | 126.5(4) |
| C(27)–N(27)–Fe(2)   | 121.6(3) | N(42)–C(4a3)–C(4b3)  | 109.4(3) |
| N(27)–C(25)–N(28)   | 109.5(4) | C(4m1)–C(4a3)–C(4b3) | 124.2(4) |
| N(27)–C(25)–C(28)   | 128.5(4) | N(42)–C(4a4)–C(4m2)  | 126.1(4) |
| N(28)–C(25)–C(28)   | 122.0(4) | N(42)–C(4a4)–C(4b4)  | 109.7(3) |
| C(25)–N(28)–C(26)   | 110.0(3) | C(4m2)–C(4a4)–C(4b4) | 124.2(4) |
| C(25)–N(28)–H(28n)  | 125.0    | N(43)–C(4a5)–C(4m2)  | 125.4(3) |
| C(26)–N(28)–H(28n)  | 125.0    | N(43)–C(4a5)–C(4b5)  | 109.3(3) |
| C(27)–C(26)–N(28)   | 104.5(4) | C(4m2)–C(4a5)–C(4b5) | 125.3(4) |
| C(27)–C(26)–H(26)   | 127.8    | N(43)–C(4a6)–C(4m3)  | 125.6(4) |
| N(28)–C(26)–H(26)   | 127.8    | N(43)–C(4a6)–C(4b6)  | 109.8(4) |
| C(26)–C(27)–N(27)   | 110.8(4) | C(4m3)–C(4a6)–C(4b6) | 124.6(4) |
| C(26)–C(27)–H(27)   | 124.6    | N(44)–C(4a7)–C(4m3)  | 125.4(4) |
| N(27)–C(27)–H(27)   | 124.6    | N(44)–C(4a7)–C(4b7)  | 109.8(3) |
| C(25)–C(28)–H(28a)  | 109.5    | C(4m3)–C(4a7)–C(4b7) | 124.8(4) |
| C(25)–C(28)–H(28b)  | 109.5    | N(44)–C(4a8)–C(4m4)  | 126.4(4) |
| H(28a)–C(28)–H(28b) | 109.5    | N(44)–C(4a8)–C(4b8)  | 109.1(3) |
| C(25)–C(28)–H(28c)  | 109.5    | C(4m4)–C(4a8)–C(4b8) | 124.5(4) |

**Table S4.** Continued

| angle                | degree   | angle                | degree   |
|----------------------|----------|----------------------|----------|
| H(28a)–C(28)–H(28c)  | 109.5    | C(4b2)–C(4b1)–C(4a1) | 106.8(4) |
| H(28b)–C(28)–H(28c)  | 109.5    | C(4b2)–C(4b1)–H(4b1) | 126.6    |
| C(2m4)–C(2a1)–N(21)  | 125.1(3) | C(4a1)–C(4b1)–H(4b1) | 126.6    |
| C(2m4)–C(2a1)–C(2b1) | 124.8(4) | C(4b1)–C(4b2)–C(4a2) | 107.7(4) |
| N(21)–C(2a1)–C(2b1)  | 109.8(3) | C(4b1)–C(4b2)–H(4b2) | 126.1    |
| N(21)–C(2a2)–C(2m1)  | 124.6(4) | C(4a2)–C(4b2)–H(4b2) | 126.1    |
| N(21)–C(2a2)–C(2b2)  | 110.5(3) | C(4b4)–C(4b3)–C(4a3) | 107.0(4) |
| C(2m1)–C(2a2)–C(2b2) | 124.7(4) | C(4b4)–C(4b3)–H(4b3) | 126.5    |
| C(2m1)–C(2a3)–N(22)  | 125.0(4) | C(4a3)–C(4b3)–H(4b3) | 126.5    |
| C(2m1)–C(2a3)–C(2b3) | 124.2(4) | C(4b3)–C(4b4)–C(4a4) | 107.4(4) |
| N(22)–C(2a3)–C(2b3)  | 110.5(3) | C(4b3)–C(4b4)–H(4b4) | 126.3    |
| N(22)–C(2a4)–C(2m2)  | 124.5(4) | C(4a4)–C(4b4)–H(4b4) | 126.3    |
| N(22)–C(2a4)–C(2b4)  | 110.7(3) | C(4b6)–C(4b5)–C(4a5) | 107.2(4) |
| C(2m2)–C(2a4)–C(2b4) | 124.5(4) | C(4b6)–C(4b5)–H(4b5) | 126.4    |
| N(23)–C(2a5)–C(2m2)  | 124.8(4) | C(4a5)–C(4b5)–H(4b5) | 126.4    |
| N(23)–C(2a5)–C(2b5)  | 110.3(4) | C(4b5)–C(4b6)–C(4a6) | 106.9(4) |
| C(2m2)–C(2a5)–C(2b5) | 124.3(4) | C(4b5)–C(4b6)–H(4b6) | 126.6    |
| N(23)–C(2a6)–C(2m3)  | 124.7(4) | C(4a6)–C(4b6)–H(4b6) | 126.6    |
| N(23)–C(2a6)–C(2b6)  | 109.2(4) | C(4b8)–C(4b7)–C(4a7) | 107.8(4) |
| C(2m3)–C(2a6)–C(2b6) | 125.8(4) | C(4b8)–C(4b7)–H(4b7) | 126.1    |
| N(24)–C(2a7)–C(2m3)  | 125.1(4) | C(4a7)–C(4b7)–H(4b7) | 126.1    |
| N(24)–C(2a7)–C(2b7)  | 110.0(3) | C(4b7)–C(4b8)–C(4a8) | 106.9(4) |
| C(2m3)–C(2a7)–C(2b7) | 124.7(4) | C(4b7)–C(4b8)–H(4b8) | 126.6    |
| N(24)–C(2a8)–C(2m4)  | 125.0(4) | C(4a8)–C(4b8)–H(4b8) | 126.6    |
| N(24)–C(2a8)–C(2b8)  | 110.0(3) | C(4a2)–C(4m1)–C(4a3) | 124.9(4) |
| C(2m4)–C(2a8)–C(2b8) | 124.6(4) | C(4a2)–C(4m1)–C(411) | 119.7(4) |
| C(2b2)–C(2b1)–C(2a1) | 106.7(4) | C(4a3)–C(4m1)–C(411) | 115.4(4) |
| C(2b2)–C(2b1)–H(2b1) | 126.7    | C(4a4)–C(4m2)–C(4a5) | 125.0(3) |
| C(2a1)–C(2b1)–H(2b1) | 126.7    | C(4a4)–C(4m2)–C(421) | 117.4(3) |
| C(2b1)–C(2b2)–C(2a2) | 107.2(3) | C(4a5)–C(4m2)–C(421) | 117.6(3) |
| C(2b1)–C(2b2)–H(2b2) | 126.4    | C(4a7)–C(4m3)–C(4a6) | 125.2(4) |
| C(2a2)–C(2b2)–H(2b2) | 126.4    | C(4a7)–C(4m3)–C(431) | 117.0(3) |
| C(2b4)–C(2b3)–C(2a3) | 106.7(3) | C(4a6)–C(4m3)–C(431) | 117.7(3) |
| C(2b4)–C(2b3)–H(2b3) | 126.6    | C(4a1)–C(4m4)–C(4a8) | 125.4(4) |

**Table S4.** Continued

| angle                | degree   | angle                | degree   |
|----------------------|----------|----------------------|----------|
| C(2a3)–C(2b3)–H(2b3) | 126.6    | C(4a1)–C(4m4)–C(441) | 118.4(4) |
| C(2b3)–C(2b4)–C(2a4) | 107.0(4) | C(4a8)–C(4m4)–C(441) | 116.2(4) |
| C(2b3)–C(2b4)–H(2b4) | 126.5    | C(416)–C(411)–C(412) | 120.3(4) |
| C(2a4)–C(2b4)–H(2b4) | 126.5    | C(416)–C(411)–C(4m1) | 120.7(4) |
| C(2b6)–C(2b5)–C(2a5) | 106.6(4) | C(412)–C(411)–C(4m1) | 119.0(4) |
| C(2b6)–C(2b5)–H(2b5) | 126.7    | C(413)–C(412)–C(411) | 117.6(5) |
| C(2a5)–C(2b5)–H(2b5) | 126.7    | C(413)–C(412)–C(417) | 121.9(5) |
| C(2b5)–C(2b6)–C(2a6) | 107.9(4) | C(411)–C(412)–C(417) | 120.5(4) |
| C(2b5)–C(2b6)–H(2b6) | 126.1    | C(414)–C(413)–C(412) | 123.5(5) |
| C(2a6)–C(2b6)–H(2b6) | 126.1    | C(414)–C(413)–H(413) | 118.2    |
| C(2b8)–C(2b7)–C(2a7) | 107.4(4) | C(412)–C(413)–H(413) | 118.2    |
| C(2b8)–C(2b7)–H(2b7) | 126.3    | C(413)–C(414)–C(415) | 117.8(5) |
| C(2a7)–C(2b7)–H(2b7) | 126.3    | C(413)–C(414)–C(418) | 123.6(6) |
| C(2b7)–C(2b8)–C(2a8) | 106.8(4) | C(415)–C(414)–C(418) | 118.6(6) |
| C(2b7)–C(2b8)–H(2b8) | 126.6    | C(414)–C(415)–C(416) | 122.1(5) |
| C(2a8)–C(2b8)–H(2b8) | 126.6    | C(414)–C(415)–H(415) | 118.9    |
| C(2a3)–C(2m1)–C(2a2) | 124.1(4) | C(416)–C(415)–H(415) | 118.9    |
| C(2a3)–C(2m1)–C(211) | 117.0(4) | C(411)–C(416)–C(415) | 118.6(5) |
| C(2a2)–C(2m1)–C(211) | 118.8(3) | C(411)–C(416)–C(419) | 120.7(4) |
| C(2a5)–C(2m2)–C(2a4) | 122.5(4) | C(415)–C(416)–C(419) | 120.6(5) |
| C(2a5)–C(2m2)–C(221) | 121.0(4) | C(412)–C(417)–H(4d7) | 109.5    |
| C(2a4)–C(2m2)–C(221) | 116.3(4) | C(412)–C(417)–H(4e7) | 109.5    |
| C(2a6)–C(2m3)–C(2a7) | 123.7(4) | H(4d7)–C(417)–H(4e7) | 109.5    |
| C(2a6)–C(2m3)–C(231) | 119.0(3) | C(412)–C(417)–H(4f7) | 109.5    |
| C(2a7)–C(2m3)–C(231) | 117.3(4) | H(4d7)–C(417)–H(4f7) | 109.5    |
| C(2a1)–C(2m4)–C(2a8) | 122.3(4) | H(4e7)–C(417)–H(4f7) | 109.5    |
| C(2a1)–C(2m4)–C(241) | 120.0(3) | C(414)–C(418)–H(4d8) | 109.5    |
| C(2a8)–C(2m4)–C(241) | 117.5(3) | C(414)–C(418)–H(4e8) | 109.5    |
| C(216)–C(211)–C(212) | 121.1(4) | H(4d8)–C(418)–H(4e8) | 109.5    |
| C(216)–C(211)–C(2m1) | 120.5(4) | C(414)–C(418)–H(4f8) | 109.5    |
| C(212)–C(211)–C(2m1) | 118.3(3) | H(4d8)–C(418)–H(4f8) | 109.5    |
| C(213)–C(212)–C(211) | 118.6(4) | H(4e8)–C(418)–H(4f8) | 109.5    |
| C(213)–C(212)–C(217) | 121.3(4) | C(416)–C(419)–H(4d9) | 109.5    |
| C(211)–C(212)–C(217) | 120.1(4) | C(416)–C(419)–H(4e9) | 109.5    |



**Table S4.** Continued

| angle                | degree   | angle                | degree   |
|----------------------|----------|----------------------|----------|
| C(212)–C(213)–C(214) | 121.9(4) | H(4d9)–C(419)–H(4e9) | 109.5    |
| C(212)–C(213)–H(213) | 119.0    | C(416)–C(419)–H(4f9) | 109.5    |
| C(214)–C(213)–H(213) | 119.0    | H(4d9)–C(419)–H(4f9) | 109.5    |
| C(213)–C(214)–C(215) | 118.2(4) | H(4e9)–C(419)–H(4f9) | 109.5    |
| C(213)–C(214)–C(218) | 121.2(4) | C(426)–C(421)–C(422) | 120.7(4) |
| C(215)–C(214)–C(218) | 120.6(4) | C(426)–C(421)–C(4m2) | 120.2(4) |
| C(214)–C(215)–C(216) | 121.3(4) | C(422)–C(421)–C(4m2) | 119.1(4) |
| C(214)–C(215)–H(215) | 119.3    | C(423)–C(422)–C(421) | 117.8(4) |
| C(216)–C(215)–H(215) | 119.3    | C(423)–C(422)–C(427) | 121.0(4) |
| C(211)–C(216)–C(215) | 118.8(4) | C(421)–C(422)–C(427) | 121.3(4) |
| C(211)–C(216)–C(219) | 121.3(4) | C(424)–C(423)–C(422) | 122.6(4) |
| C(215)–C(216)–C(219) | 119.9(4) | C(424)–C(423)–H(423) | 118.7    |
| C(212)–C(217)–H(2d7) | 109.5    | C(422)–C(423)–H(423) | 118.7    |
| C(212)–C(217)–H(2e7) | 109.5    | C(425)–C(424)–C(423) | 118.4(4) |
| H(2d7)–C(217)–H(2e7) | 109.5    | C(425)–C(424)–C(428) | 121.4(4) |
| C(212)–C(217)–H(2f7) | 109.5    | C(423)–C(424)–C(428) | 120.1(4) |
| H(2d7)–C(217)–H(2f7) | 109.5    | C(424)–C(425)–C(426) | 122.1(4) |
| H(2e7)–C(217)–H(2f7) | 109.5    | C(424)–C(425)–H(425) | 118.9    |
| C(214)–C(218)–H(2d8) | 109.5    | C(426)–C(425)–H(425) | 118.9    |
| C(214)–C(218)–H(2e8) | 109.5    | C(421)–C(426)–C(425) | 118.3(4) |
| H(2d8)–C(218)–H(2e8) | 109.5    | C(421)–C(426)–C(429) | 121.8(4) |
| C(214)–C(218)–H(2f8) | 109.5    | C(425)–C(426)–C(429) | 119.9(4) |
| H(2d8)–C(218)–H(2f8) | 109.5    | C(422)–C(427)–H(4g7) | 109.5    |
| H(2e8)–C(218)–H(2f8) | 109.5    | C(422)–C(427)–H(4h7) | 109.5    |
| C(216)–C(219)–H(2d9) | 109.5    | H(4g7)–C(427)–H(4h7) | 109.5    |
| C(216)–C(219)–H(2e9) | 109.5    | C(422)–C(427)–H(4i7) | 109.5    |
| H(2d9)–C(219)–H(2e9) | 109.5    | H(4g7)–C(427)–H(4i7) | 109.5    |
| C(216)–C(219)–H(2f9) | 109.5    | H(4h7)–C(427)–H(4i7) | 109.5    |
| H(2d9)–C(219)–H(2f9) | 109.5    | C(424)–C(428)–H(4g8) | 109.5    |
| H(2e9)–C(219)–H(2f9) | 109.5    | C(424)–C(428)–H(4h8) | 109.5    |
| C(222)–C(221)–C(226) | 120.1(4) | H(4g8)–C(428)–H(4h8) | 109.5    |
| C(222)–C(221)–C(2m2) | 118.7(4) | C(424)–C(428)–H(4i8) | 109.5    |
| C(226)–C(221)–C(2m2) | 121.0(4) | H(4g8)–C(428)–H(4i8) | 109.5    |
| C(221)–C(222)–C(223) | 118.5(5) | H(4h8)–C(428)–H(4i8) | 109.5    |

**Table S4.** Continued

| angle                | degree   | angle                | degree   |
|----------------------|----------|----------------------|----------|
| C(221)–C(222)–C(227) | 121.1(5) | C(426)–C(429)–H(4g9) | 109.5    |
| C(223)–C(222)–C(227) | 120.3(5) | C(426)–C(429)–H(4h9) | 109.5    |
| C(224)–C(223)–C(222) | 123.0(5) | H(4g9)–C(429)–H(4h9) | 109.5    |
| C(224)–C(223)–H(223) | 118.5    | C(426)–C(429)–H(4i9) | 109.5    |
| C(222)–C(223)–H(223) | 118.5    | H(4g9)–C(429)–H(4i9) | 109.5    |
| C(223)–C(224)–C(225) | 118.0(5) | H(4h9)–C(429)–H(4i9) | 109.5    |
| C(223)–C(224)–C(228) | 123.1(6) | C(436)–C(431)–C(432) | 120.2(4) |
| C(225)–C(224)–C(228) | 118.8(5) | C(436)–C(431)–C(4m3) | 119.5(4) |
| C(224)–C(225)–C(226) | 121.3(5) | C(432)–C(431)–C(4m3) | 120.3(4) |
| C(224)–C(225)–H(225) | 119.4    | C(433)–C(432)–C(431) | 118.8(4) |
| C(226)–C(225)–H(225) | 119.4    | C(433)–C(432)–C(437) | 120.5(4) |
| C(221)–C(226)–C(225) | 119.2(5) | C(431)–C(432)–C(437) | 120.7(4) |
| C(221)–C(226)–C(229) | 121.5(4) | C(434)–C(433)–C(432) | 122.2(4) |
| C(225)–C(226)–C(229) | 119.3(4) | C(434)–C(433)–H(433) | 118.9    |
| C(222)–C(227)–H(2g7) | 109.5    | C(432)–C(433)–H(433) | 118.9    |
| C(222)–C(227)–H(2h7) | 109.5    | C(433)–C(434)–C(435) | 117.9(4) |
| H(2g7)–C(227)–H(2h7) | 109.5    | C(433)–C(434)–C(438) | 121.8(5) |
| C(222)–C(227)–H(2i7) | 109.5    | C(435)–C(434)–C(438) | 120.3(4) |
| H(2g7)–C(227)–H(2i7) | 109.5    | C(434)–C(435)–C(436) | 121.9(4) |
| H(2h7)–C(227)–H(2i7) | 109.5    | C(434)–C(435)–H(435) | 119.0    |
| C(224)–C(228)–H(2g8) | 109.5    | C(436)–C(435)–H(435) | 119.0    |
| C(224)–C(228)–H(2h8) | 109.5    | C(431)–C(436)–C(435) | 119.0(4) |
| H(2g8)–C(228)–H(2h8) | 109.5    | C(431)–C(436)–C(439) | 120.9(4) |
| C(224)–C(228)–H(2i8) | 109.5    | C(435)–C(436)–C(439) | 120.1(4) |
| H(2g8)–C(228)–H(2i8) | 109.5    | C(432)–C(437)–H(4j7) | 109.5    |
| H(2h8)–C(228)–H(2i8) | 109.5    | C(432)–C(437)–H(4k7) | 109.5    |
| C(226)–C(229)–H(2g9) | 109.5    | H(4j7)–C(437)–H(4k7) | 109.5    |
| C(226)–C(229)–H(2h9) | 109.5    | C(432)–C(437)–H(4l7) | 109.5    |
| H(2g9)–C(229)–H(2h9) | 109.5    | H(4j7)–C(437)–H(4l7) | 109.5    |
| C(226)–C(229)–H(2i9) | 109.5    | H(4k7)–C(437)–H(4l7) | 109.5    |
| H(2g9)–C(229)–H(2i9) | 109.5    | C(434)–C(438)–H(4j8) | 109.5    |
| H(2h9)–C(229)–H(2i9) | 109.5    | C(434)–C(438)–H(4k8) | 109.5    |
| C(236)–C(231)–C(232) | 119.8(4) | H(4j8)–C(438)–H(4k8) | 109.5    |
| C(236)–C(231)–C(2m3) | 118.2(4) | C(434)–C(438)–H(4l8) | 109.5    |

**Table S4.** Continued

| angle                | degree   | angle                | degree   |
|----------------------|----------|----------------------|----------|
| C(232)–C(231)–C(2m3) | 121.9(4) | H(4j8)–C(438)–H(4l8) | 109.5    |
| C(233)–C(232)–C(231) | 118.7(4) | H(4k8)–C(438)–H(4l8) | 109.5    |
| C(233)–C(232)–C(237) | 121.2(4) | C(436)–C(439)–H(4j9) | 109.5    |
| C(231)–C(232)–C(237) | 120.1(4) | C(436)–C(439)–H(4k9) | 109.5    |
| C(234)–C(233)–C(232) | 122.7(4) | H(4j9)–C(439)–H(4k9) | 109.5    |
| C(234)–C(233)–H(233) | 118.7    | C(436)–C(439)–H(4l9) | 109.5    |
| C(232)–C(233)–H(233) | 118.7    | H(4j9)–C(439)–H(4l9) | 109.5    |
| C(233)–C(234)–C(235) | 117.9(4) | H(4k9)–C(439)–H(4l9) | 109.5    |
| C(233)–C(234)–C(238) | 121.6(4) | C(442)–C(441)–C(446) | 120.6(4) |
| C(235)–C(234)–C(238) | 120.5(5) | C(442)–C(441)–C(4m4) | 120.0(4) |
| C(236)–C(235)–C(234) | 121.5(4) | C(446)–C(441)–C(4m4) | 119.3(4) |
| C(236)–C(235)–H(235) | 119.3    | C(441)–C(442)–C(443) | 118.9(5) |
| C(234)–C(235)–H(235) | 119.3    | C(441)–C(442)–C(447) | 120.9(4) |
| C(235)–C(236)–C(231) | 119.4(4) | C(443)–C(442)–C(447) | 120.2(5) |
| C(235)–C(236)–C(239) | 119.5(4) | C(444)–C(443)–C(442) | 122.0(5) |
| C(231)–C(236)–C(239) | 121.1(4) | C(444)–C(443)–H(443) | 119.0    |
| C(232)–C(237)–H(2j7) | 109.5    | C(442)–C(443)–H(443) | 119.0    |
| C(232)–C(237)–H(2k7) | 109.5    | C(443)–C(444)–C(445) | 118.3(5) |
| H(2j7)–C(237)–H(2k7) | 109.5    | C(443)–C(444)–C(448) | 121.7(6) |
| C(232)–C(237)–H(2l7) | 109.5    | C(445)–C(444)–C(448) | 120.0(6) |
| H(2j7)–C(237)–H(2l7) | 109.5    | C(444)–C(445)–C(446) | 122.1(5) |
| H(2k7)–C(237)–H(2l7) | 109.5    | C(444)–C(445)–H(445) | 118.9    |
| C(234)–C(238)–H(2j8) | 109.5    | C(446)–C(445)–H(445) | 118.9    |
| C(234)–C(238)–H(2k8) | 109.5    | C(445)–C(446)–C(441) | 118.0(4) |
| H(2j8)–C(238)–H(2k8) | 109.5    | C(445)–C(446)–C(449) | 120.8(5) |
| C(234)–C(238)–H(2l8) | 109.5    | C(441)–C(446)–C(449) | 121.2(4) |
| H(2j8)–C(238)–H(2l8) | 109.5    | C(442)–C(447)–H(4m7) | 109.5    |
| H(2k8)–C(238)–H(2l8) | 109.5    | C(442)–C(447)–H(4n7) | 109.5    |
| C(236)–C(239)–H(2j9) | 109.5    | H(4m7)–C(447)–H(4n7) | 109.5    |
| C(236)–C(239)–H(2k9) | 109.5    | C(442)–C(447)–H(4p7) | 109.5    |
| H(2j9)–C(239)–H(2k9) | 109.5    | H(4m7)–C(447)–H(4p7) | 109.5    |
| C(236)–C(239)–H(2l9) | 109.5    | H(4n7)–C(447)–H(4p7) | 109.5    |
| H(2j9)–C(239)–H(2l9) | 109.5    | C(444)–C(448)–H(4m8) | 109.5    |
| H(2k9)–C(239)–H(2l9) | 109.5    | C(444)–C(448)–H(4n8) | 109.5    |

**Table S4.** Continued

| angle                | degree   | angle                | degree    |
|----------------------|----------|----------------------|-----------|
| C(242)–C(241)–C(246) | 119.1(4) | H(4m8)–C(448)–H(4n8) | 109.5     |
| C(242)–C(241)–C(2m4) | 121.1(4) | C(444)–C(448)–H(4p8) | 109.5     |
| C(246)–C(241)–C(2m4) | 119.7(4) | H(4m8)–C(448)–H(4p8) | 109.5     |
| C(241)–C(242)–C(243) | 120.7(4) | H(4n8)–C(448)–H(4p8) | 109.5     |
| C(241)–C(242)–C(247) | 120.9(4) | C(446)–C(449)–H(4m9) | 109.5     |
| C(243)–C(242)–C(247) | 118.4(4) | C(446)–C(449)–H(4n9) | 109.5     |
| C(244)–C(243)–C(242) | 121.2(4) | H(4m9)–C(449)–H(4n9) | 109.5     |
| C(244)–C(243)–H(243) | 119.4    | C(446)–C(449)–H(4p9) | 109.5     |
| C(242)–C(243)–H(243) | 119.4    | H(4m9)–C(449)–H(4p9) | 109.5     |
| C(245)–C(244)–C(243) | 118.4(4) | H(4n9)–C(449)–H(4p9) | 109.5     |
| C(245)–C(244)–C(248) | 121.6(4) | C(6s)–C(1s)–C(2s)    | 118.9(8)  |
| C(243)–C(244)–C(248) | 120.0(5) | C(6s)–C(1s)–C(7s)    | 120.9(7)  |
| C(244)–C(245)–C(246) | 122.0(4) | C(2s)–C(1s)–C(7s)    | 120.1(7)  |
| C(244)–C(245)–H(245) | 119.0    | C(1s)–C(2s)–C(3s)    | 121.8(7)  |
| C(246)–C(245)–H(245) | 119.0    | C(2s)–C(3s)–C(4s)    | 122.5(8)  |
| C(241)–C(246)–C(245) | 118.4(4) | C(5s)–C(4s)–C(3s)    | 112.7(8)  |
| C(241)–C(246)–C(249) | 121.5(4) | C(4s)–C(5s)–C(6s)    | 123.7(7)  |
| C(245)–C(246)–C(249) | 120.1(4) | C(1s)–C(6s)–C(5s)    | 120.3(7)  |
| C(242)–C(247)–H(2m7) | 109.5    | C(9s)–Cl(1)–C(8s)    | 27.5(8)   |
| C(242)–C(247)–H(2n7) | 109.5    | Cl(1)–C(8s)–Cl(2)    | 111.0(11) |
| H(2m7)–C(247)–H(2n7) | 109.5    | Cl(1)–C(9s)–Cl(3)    | 115.4(15) |
| C(242)–C(247)–H(2p7) | 109.5    | C(31s)–N(35s)–C(33s) | 106.4     |
| H(2m7)–C(247)–H(2p7) | 109.5    | N(35s)–C(31s)–N(36s) | 108.7     |
| H(2n7)–C(247)–H(2p7) | 109.5    | N(35s)–C(31s)–C(34s) | 129.6     |
| C(244)–C(248)–H(2m8) | 109.5    | N(36s)–C(31s)–C(34s) | 121.6     |
| C(244)–C(248)–H(2n8) | 109.5    | C(32s)–N(36s)–C(31s) | 109.4     |
| H(2m8)–C(248)–H(2n8) | 109.5    | C(33s)–C(32s)–N(36s) | 105.5     |
| C(244)–C(248)–H(2p8) | 109.5    | C(32s)–C(33s)–N(35s) | 110.0     |
| H(2m8)–C(248)–H(2p8) | 109.5    | O(2s)#1–C(2os)–O(2s) | 58.3(15)  |
| H(2n8)–C(248)–H(2p8) | 109.5    | O(2s)#1–O(2s)–C(2os) | 60.9(8)   |
| C(246)–C(249)–H(2m9) | 109.5    |                      |           |
| C(246)–C(249)–H(2n9) | 109.5    |                      |           |

<sup>a</sup>The estimated standard deviations of the least significant digits are given in parentheses.

**Table S5.** Anisotropic Displacement Parameters ( $\text{\AA}^2$ ) for  $[\text{Fe}(\text{TMP})(2\text{-MeHIm})_2]_2 \cdot [\text{Fe}(\text{TMP})(2\text{-MeHIm})_2]$ 

| atom   | $U_{11}$   | $U_{22}$   | $U_{33}$   | $U_{23}$    | $U_{13}$    | $U_{12}$    |
|--------|------------|------------|------------|-------------|-------------|-------------|
| Fe(1)  | 0.0189(3)  | 0.0182(3)  | 0.0183(3)  | 0.0008(2)   | 0.0014(2)   | -0.0005(2)  |
| N(11)  | 0.0156(15) | 0.0192(16) | 0.0216(18) | 0.0001(14)  | -0.0016(13) | -0.0005(12) |
| N(12)  | 0.0218(16) | 0.0216(17) | 0.0210(18) | 0.0019(14)  | 0.0041(14)  | 0.0019(13)  |
| N(13)  | 0.0232(17) | 0.0200(16) | 0.0202(18) | 0.0022(14)  | 0.0025(14)  | -0.0021(13) |
| N(14)  | 0.0219(17) | 0.0214(17) | 0.027(2)   | 0.0003(14)  | 0.0022(14)  | -0.0024(13) |
| N(15)  | 0.0224(16) | 0.0152(15) | 0.0191(18) | 0.0000(13)  | 0.0013(13)  | -0.0017(13) |
| C(11)  | 0.024(2)   | 0.024(2)   | 0.024(2)   | 0.0028(17)  | 0.0064(17)  | -0.0018(16) |
| N(16)  | 0.0182(16) | 0.0315(18) | 0.028(2)   | -0.0023(15) | -0.0024(14) | 0.0019(14)  |
| C(12)  | 0.028(2)   | 0.031(2)   | 0.025(2)   | 0.0004(18)  | -0.0066(18) | 0.0001(17)  |
| C(13)  | 0.031(2)   | 0.023(2)   | 0.024(2)   | -0.0015(17) | -0.0015(18) | 0.0016(17)  |
| C(14)  | 0.025(2)   | 0.044(3)   | 0.037(3)   | -0.008(2)   | 0.001(2)    | 0.0020(19)  |
| N(17)  | 0.0190(16) | 0.0342(19) | 0.0216(19) | -0.0040(15) | 0.0026(14)  | -0.0030(14) |
| C(15)  | 0.025(2)   | 0.037(2)   | 0.028(2)   | -0.0024(19) | 0.0041(18)  | 0.0035(18)  |
| N(18)  | 0.0239(18) | 0.038(2)   | 0.033(2)   | 0.0060(17)  | 0.0000(16)  | -0.0014(16) |
| C(16)  | 0.032(2)   | 0.047(3)   | 0.042(3)   | 0.015(2)    | 0.001(2)    | 0.002(2)    |
| C(17)  | 0.028(2)   | 0.038(3)   | 0.039(3)   | 0.011(2)    | 0.001(2)    | 0.0026(19)  |
| C(18)  | 0.024(2)   | 0.038(3)   | 0.061(3)   | 0.001(2)    | -0.003(2)   | 0.0011(19)  |
| C(1a1) | 0.0195(19) | 0.030(2)   | 0.023(2)   | -0.0023(17) | -0.0003(16) | -0.0015(16) |
| C(1a2) | 0.0147(17) | 0.0203(19) | 0.019(2)   | 0.0023(15)  | -0.0007(15) | -0.0005(14) |
| C(1a3) | 0.024(2)   | 0.0181(19) | 0.025(2)   | 0.0036(16)  | 0.0007(17)  | 0.0029(15)  |
| C(1a4) | 0.0208(19) | 0.0209(19) | 0.022(2)   | 0.0016(16)  | 0.0033(16)  | -0.0004(15) |
| C(1a5) | 0.0203(19) | 0.0222(19) | 0.022(2)   | 0.0028(16)  | 0.0024(16)  | -0.0008(15) |
| C(1a6) | 0.025(2)   | 0.023(2)   | 0.016(2)   | 0.0000(16)  | 0.0011(16)  | -0.0011(16) |
| C(1a7) | 0.024(2)   | 0.0202(19) | 0.030(2)   | 0.0018(17)  | 0.0006(18)  | -0.0021(15) |
| C(1a8) | 0.026(2)   | 0.026(2)   | 0.018(2)   | -0.0075(17) | 0.0022(16)  | -0.0035(16) |
| C(1b1) | 0.025(2)   | 0.032(2)   | 0.017(2)   | -0.0037(17) | 0.0030(17)  | -0.0044(16) |
| C(1b2) | 0.0204(19) | 0.030(2)   | 0.022(2)   | 0.0045(17)  | 0.0042(16)  | -0.0007(16) |
| C(1b3) | 0.026(2)   | 0.021(2)   | 0.033(3)   | 0.0006(18)  | 0.0008(18)  | -0.0007(16) |
| C(1b4) | 0.033(2)   | 0.0173(19) | 0.024(2)   | -0.0004(16) | 0.0027(18)  | 0.0025(16)  |
| C(1b5) | 0.035(2)   | 0.025(2)   | 0.032(3)   | 0.0055(19)  | 0.014(2)    | 0.0018(18)  |
| C(1b6) | 0.038(2)   | 0.024(2)   | 0.024(2)   | 0.0041(17)  | 0.0076(18)  | -0.0026(18) |
| C(1b7) | 0.036(2)   | 0.023(2)   | 0.035(3)   | -0.0019(19) | 0.005(2)    | -0.0010(18) |
| C(1b8) | 0.042(3)   | 0.029(2)   | 0.026(2)   | -0.0081(19) | 0.005(2)    | -0.0070(19) |
| C(1m1) | 0.0223(19) | 0.0195(19) | 0.022(2)   | 0.0016(16)  | 0.0012(16)  | 0.0005(15)  |

**Table S5.** Continued

| atom   | $U_{11}$   | $U_{22}$   | $U_{33}$ | $U_{23}$    | $U_{13}$    | $U_{12}$    |
|--------|------------|------------|----------|-------------|-------------|-------------|
| C(1m2) | 0.0173(18) | 0.028(2)   | 0.024(2) | 0.0041(17)  | 0.0004(16)  | 0.0033(16)  |
| C(1m3) | 0.0210(19) | 0.0217(19) | 0.026(2) | 0.0020(17)  | 0.0001(17)  | -0.0017(15) |
| C(1m4) | 0.026(2)   | 0.030(2)   | 0.029(2) | -0.0066(19) | 0.0055(18)  | -0.0019(17) |
| C(111) | 0.023(2)   | 0.022(2)   | 0.022(2) | -0.0034(16) | 0.0007(16)  | -0.0010(16) |
| C(112) | 0.0232(19) | 0.023(2)   | 0.020(2) | -0.0037(16) | 0.0023(16)  | -0.0021(16) |
| C(113) | 0.022(2)   | 0.029(2)   | 0.025(2) | -0.0090(18) | 0.0053(17)  | -0.0030(16) |
| C(114) | 0.036(2)   | 0.022(2)   | 0.022(2) | -0.0044(17) | 0.0130(18)  | -0.0073(17) |
| C(115) | 0.032(2)   | 0.0176(19) | 0.021(2) | 0.0023(16)  | 0.0077(17)  | -0.0009(16) |
| C(116) | 0.027(2)   | 0.022(2)   | 0.022(2) | 0.0002(17)  | 0.0040(17)  | -0.0008(16) |
| C(117) | 0.029(2)   | 0.034(2)   | 0.031(3) | 0.0013(19)  | -0.0035(19) | 0.0000(18)  |
| C(118) | 0.042(3)   | 0.031(2)   | 0.034(3) | 0.002(2)    | 0.009(2)    | -0.009(2)   |
| C(119) | 0.027(2)   | 0.030(2)   | 0.036(3) | 0.0010(19)  | -0.0072(19) | -0.0033(17) |
| C(121) | 0.0208(19) | 0.0160(18) | 0.025(2) | 0.0049(16)  | 0.0044(17)  | 0.0028(14)  |
| C(122) | 0.033(2)   | 0.030(2)   | 0.029(3) | 0.0037(19)  | 0.0062(19)  | 0.0053(18)  |
| C(123) | 0.043(3)   | 0.040(3)   | 0.027(3) | -0.006(2)   | 0.008(2)    | 0.006(2)    |
| C(124) | 0.033(2)   | 0.033(2)   | 0.048(3) | -0.002(2)   | 0.016(2)    | 0.0045(19)  |
| C(125) | 0.025(2)   | 0.036(2)   | 0.048(3) | 0.002(2)    | 0.011(2)    | 0.0071(18)  |
| C(126) | 0.022(2)   | 0.028(2)   | 0.034(3) | 0.0049(18)  | 0.0050(18)  | 0.0048(16)  |
| C(127) | 0.039(3)   | 0.068(4)   | 0.029(3) | -0.008(2)   | -0.007(2)   | 0.013(2)    |
| C(128) | 0.054(3)   | 0.074(4)   | 0.064(4) | -0.010(3)   | 0.023(3)    | 0.014(3)    |
| C(129) | 0.033(3)   | 0.061(3)   | 0.049(3) | -0.003(3)   | -0.010(2)   | 0.000(2)    |
| C(131) | 0.030(2)   | 0.0212(19) | 0.021(2) | 0.0013(16)  | 0.0028(17)  | -0.0001(16) |
| C(132) | 0.030(2)   | 0.024(2)   | 0.027(2) | -0.0018(17) | 0.0020(18)  | -0.0018(17) |
| C(133) | 0.031(2)   | 0.025(2)   | 0.023(2) | -0.0021(17) | 0.0005(17)  | 0.0007(17)  |
| C(134) | 0.046(3)   | 0.0176(19) | 0.021(2) | -0.0020(16) | 0.0077(19)  | 0.0005(17)  |
| C(135) | 0.031(2)   | 0.021(2)   | 0.027(2) | -0.0037(17) | 0.0069(18)  | -0.0061(16) |
| C(136) | 0.032(2)   | 0.021(2)   | 0.025(2) | -0.0056(17) | 0.0031(18)  | -0.0010(17) |
| C(137) | 0.033(2)   | 0.025(2)   | 0.041(3) | 0.0069(19)  | -0.004(2)   | -0.0036(18) |
| C(138) | 0.058(3)   | 0.023(2)   | 0.034(3) | 0.0062(19)  | 0.001(2)    | 0.001(2)    |
| C(139) | 0.029(2)   | 0.031(2)   | 0.039(3) | 0.004(2)    | 0.005(2)    | -0.0050(18) |
| C(141) | 0.036(2)   | 0.036(2)   | 0.023(2) | -0.0073(19) | 0.0055(19)  | -0.0160(19) |
| C(142) | 0.059(3)   | 0.047(3)   | 0.036(3) | -0.014(2)   | 0.011(3)    | 0.000(3)    |
| C(143) | 0.075(4)   | 0.078(4)   | 0.041(4) | -0.027(3)   | 0.016(3)    | 0.005(3)    |
| C(144) | 0.081(4)   | 0.070(4)   | 0.031(3) | -0.019(3)   | 0.010(3)    | -0.025(3)   |

**Table S5.** Continued

| atom   | $U_{11}$   | $U_{22}$   | $U_{33}$   | $U_{23}$    | $U_{13}$    | $U_{12}$    |
|--------|------------|------------|------------|-------------|-------------|-------------|
| C(145) | 0.059(4)   | 0.077(4)   | 0.029(3)   | -0.013(3)   | -0.002(3)   | -0.030(3)   |
| C(146) | 0.038(3)   | 0.058(3)   | 0.024(3)   | -0.012(2)   | 0.002(2)    | -0.028(2)   |
| C(147) | 0.062(4)   | 0.098(5)   | 0.056(4)   | -0.021(4)   | 0.014(3)    | 0.037(4)    |
| C(148) | 0.106(6)   | 0.133(7)   | 0.042(4)   | -0.047(4)   | 0.014(4)    | -0.022(5)   |
| C(149) | 0.036(3)   | 0.090(4)   | 0.044(3)   | -0.004(3)   | -0.010(2)   | -0.017(3)   |
| Fe(2)  | 0.0177(3)  | 0.0178(3)  | 0.0186(3)  | -0.0006(2)  | 0.0013(2)   | -0.0001(2)  |
| N(21)  | 0.0206(16) | 0.0199(16) | 0.0192(17) | -0.0031(14) | -0.0002(14) | -0.0022(13) |
| N(22)  | 0.0197(16) | 0.0171(16) | 0.0226(19) | -0.0028(13) | 0.0005(14)  | -0.0026(12) |
| N(23)  | 0.0226(17) | 0.0247(17) | 0.0216(19) | -0.0005(14) | 0.0058(14)  | -0.0062(13) |
| N(24)  | 0.0187(16) | 0.0203(16) | 0.0262(19) | 0.0002(14)  | 0.0001(14)  | -0.0025(13) |
| N(25)  | 0.0252(18) | 0.042(2)   | 0.0205(19) | 0.0004(16)  | -0.0010(15) | 0.0059(15)  |
| C(21)  | 0.029(2)   | 0.072(4)   | 0.031(3)   | 0.002(3)    | -0.006(2)   | -0.016(2)   |
| N(26)  | 0.0180(17) | 0.054(2)   | 0.038(2)   | 0.0070(19)  | -0.0055(16) | -0.0043(17) |
| C(22)  | 0.043(3)   | 0.059(3)   | 0.044(3)   | 0.012(3)    | -0.009(2)   | 0.001(2)    |
| C(23)  | 0.039(3)   | 0.058(3)   | 0.028(3)   | 0.002(2)    | -0.004(2)   | 0.001(2)    |
| C(24)  | 0.048(3)   | 0.060(4)   | 0.058(4)   | 0.001(3)    | -0.004(3)   | -0.006(3)   |
| N(27)  | 0.0173(16) | 0.0214(16) | 0.029(2)   | 0.0019(14)  | 0.0002(14)  | 0.0000(13)  |
| C(25)  | 0.027(2)   | 0.027(2)   | 0.032(2)   | 0.0059(19)  | 0.0090(19)  | -0.0018(17) |
| N(28)  | 0.0140(16) | 0.0347(19) | 0.037(2)   | 0.0027(17)  | -0.0053(15) | 0.0038(14)  |
| C(26)  | 0.031(2)   | 0.037(2)   | 0.028(2)   | -0.005(2)   | -0.0070(19) | 0.0004(19)  |
| C(27)  | 0.033(2)   | 0.033(2)   | 0.025(2)   | -0.0009(19) | -0.0061(19) | 0.0005(18)  |
| C(28)  | 0.025(2)   | 0.046(3)   | 0.039(3)   | 0.004(2)    | 0.000(2)    | 0.005(2)    |
| C(2a1) | 0.0199(18) | 0.0224(19) | 0.019(2)   | -0.0016(16) | -0.0021(16) | 0.0009(15)  |
| C(2a2) | 0.0207(19) | 0.0219(19) | 0.024(2)   | 0.0014(16)  | -0.0009(16) | -0.0024(15) |
| C(2a3) | 0.0200(19) | 0.0219(19) | 0.024(2)   | 0.0037(16)  | 0.0013(16)  | 0.0017(15)  |
| C(2a4) | 0.0162(18) | 0.026(2)   | 0.023(2)   | 0.0007(17)  | -0.0014(16) | -0.0006(15) |
| C(2a5) | 0.025(2)   | 0.025(2)   | 0.024(2)   | -0.0032(17) | 0.0020(17)  | -0.0048(16) |
| C(2a6) | 0.028(2)   | 0.0159(18) | 0.028(2)   | 0.0005(17)  | 0.0026(18)  | -0.0004(15) |
| C(2a7) | 0.023(2)   | 0.024(2)   | 0.022(2)   | 0.0051(17)  | 0.0046(17)  | -0.0028(16) |
| C(2a8) | 0.0213(19) | 0.024(2)   | 0.019(2)   | -0.0014(16) | 0.0025(16)  | -0.0004(15) |
| C(2b1) | 0.028(2)   | 0.022(2)   | 0.023(2)   | -0.0024(17) | -0.0001(17) | 0.0036(16)  |
| C(2b2) | 0.028(2)   | 0.0204(19) | 0.029(2)   | -0.0025(17) | 0.0015(18)  | -0.0020(16) |
| C(2b3) | 0.0176(18) | 0.0199(18) | 0.022(2)   | -0.0006(16) | 0.0040(16)  | -0.0011(14) |
| C(2b4) | 0.025(2)   | 0.0222(19) | 0.018(2)   | -0.0024(16) | 0.0007(16)  | -0.0004(16) |

**Table S5.** Continued

| atom   | $U_{11}$   | $U_{22}$   | $U_{33}$ | $U_{23}$    | $U_{13}$    | $U_{12}$    |
|--------|------------|------------|----------|-------------|-------------|-------------|
| C(2b5) | 0.043(3)   | 0.026(2)   | 0.029(3) | -0.0090(19) | 0.012(2)    | -0.0077(19) |
| C(2b6) | 0.036(2)   | 0.021(2)   | 0.028(2) | -0.0037(17) | 0.0081(19)  | -0.0060(17) |
| C(2b7) | 0.027(2)   | 0.028(2)   | 0.026(2) | -0.0021(18) | 0.0048(18)  | -0.0001(17) |
| C(2b8) | 0.0194(19) | 0.031(2)   | 0.026(2) | 0.0008(18)  | 0.0028(17)  | -0.0013(16) |
| C(2m1) | 0.0233(19) | 0.0179(19) | 0.023(2) | -0.0004(16) | -0.0011(16) | -0.0016(15) |
| C(2m2) | 0.027(2)   | 0.0208(19) | 0.020(2) | -0.0019(17) | 0.0045(17)  | -0.0021(15) |
| C(2m3) | 0.023(2)   | 0.022(2)   | 0.030(2) | 0.0007(17)  | 0.0040(17)  | -0.0013(16) |
| C(2m4) | 0.0182(18) | 0.0221(19) | 0.023(2) | -0.0019(16) | -0.0028(16) | 0.0033(15)  |
| C(211) | 0.025(2)   | 0.022(2)   | 0.023(2) | -0.0034(16) | 0.0013(17)  | -0.0009(16) |
| C(212) | 0.027(2)   | 0.024(2)   | 0.019(2) | -0.0055(16) | 0.0004(17)  | -0.0020(16) |
| C(213) | 0.023(2)   | 0.028(2)   | 0.027(2) | -0.0045(18) | -0.0021(17) | -0.0043(17) |
| C(214) | 0.038(2)   | 0.024(2)   | 0.022(2) | 0.0001(17)  | 0.0046(18)  | -0.0051(18) |
| C(215) | 0.031(2)   | 0.023(2)   | 0.022(2) | 0.0016(17)  | 0.0006(17)  | -0.0024(17) |
| C(216) | 0.035(2)   | 0.0175(19) | 0.022(2) | -0.0026(16) | 0.0064(18)  | -0.0046(16) |
| C(217) | 0.027(2)   | 0.029(2)   | 0.027(2) | -0.0004(18) | -0.0020(18) | 0.0014(17)  |
| C(218) | 0.049(3)   | 0.031(2)   | 0.039(3) | -0.001(2)   | 0.005(2)    | -0.017(2)   |
| C(219) | 0.033(2)   | 0.028(2)   | 0.025(2) | 0.0033(18)  | -0.0039(18) | -0.0014(18) |
| C(221) | 0.035(2)   | 0.028(2)   | 0.028(2) | -0.0054(19) | 0.0023(19)  | -0.0093(18) |
| C(222) | 0.038(3)   | 0.057(3)   | 0.034(3) | -0.015(2)   | 0.002(2)    | -0.011(2)   |
| C(223) | 0.048(3)   | 0.086(4)   | 0.028(3) | -0.016(3)   | -0.007(2)   | -0.014(3)   |
| C(224) | 0.057(3)   | 0.055(3)   | 0.033(3) | -0.016(2)   | 0.005(3)    | -0.015(3)   |
| C(225) | 0.053(3)   | 0.032(2)   | 0.032(3) | -0.008(2)   | 0.012(2)    | -0.006(2)   |
| C(226) | 0.042(3)   | 0.027(2)   | 0.034(3) | -0.002(2)   | 0.011(2)    | -0.0027(19) |
| C(227) | 0.034(3)   | 0.128(6)   | 0.043(3) | -0.022(4)   | -0.006(3)   | -0.004(3)   |
| C(228) | 0.077(4)   | 0.091(5)   | 0.037(3) | -0.030(3)   | 0.007(3)    | -0.014(4)   |
| C(229) | 0.059(3)   | 0.076(4)   | 0.034(3) | -0.002(3)   | 0.006(3)    | 0.034(3)    |
| C(231) | 0.034(2)   | 0.0197(19) | 0.026(2) | -0.0062(17) | 0.0081(18)  | -0.0004(16) |
| C(232) | 0.038(2)   | 0.027(2)   | 0.024(2) | -0.0035(18) | 0.0103(19)  | 0.0016(18)  |
| C(233) | 0.045(3)   | 0.023(2)   | 0.036(3) | -0.0083(19) | 0.021(2)    | -0.0075(19) |
| C(234) | 0.053(3)   | 0.022(2)   | 0.029(3) | -0.0016(18) | 0.016(2)    | 0.0051(19)  |
| C(235) | 0.048(3)   | 0.024(2)   | 0.030(3) | 0.0002(18)  | 0.006(2)    | 0.0112(19)  |
| C(236) | 0.038(2)   | 0.024(2)   | 0.026(2) | -0.0029(18) | 0.0076(19)  | 0.0043(18)  |
| C(237) | 0.030(2)   | 0.036(2)   | 0.047(3) | -0.004(2)   | 0.006(2)    | -0.0131(19) |
| C(238) | 0.073(4)   | 0.030(2)   | 0.044(3) | 0.005(2)    | 0.007(3)    | -0.006(2)   |



**Table S5.** Continued

| atom   | $U_{11}$   | $U_{22}$   | $U_{33}$   | $U_{23}$    | $U_{13}$    | $U_{12}$    |
|--------|------------|------------|------------|-------------|-------------|-------------|
| C(239) | 0.032(2)   | 0.033(2)   | 0.043(3)   | 0.007(2)    | -0.004(2)   | -0.0026(19) |
| C(241) | 0.024(2)   | 0.0218(19) | 0.026(2)   | 0.0037(17)  | 0.0047(17)  | 0.0021(15)  |
| C(242) | 0.024(2)   | 0.044(3)   | 0.030(3)   | -0.005(2)   | -0.0031(18) | 0.0091(19)  |
| C(243) | 0.038(3)   | 0.050(3)   | 0.023(2)   | -0.010(2)   | -0.003(2)   | 0.006(2)    |
| C(244) | 0.024(2)   | 0.040(3)   | 0.042(3)   | -0.010(2)   | 0.009(2)    | 0.0057(19)  |
| C(245) | 0.020(2)   | 0.031(2)   | 0.049(3)   | -0.012(2)   | 0.005(2)    | 0.0009(17)  |
| C(246) | 0.022(2)   | 0.022(2)   | 0.035(3)   | -0.0057(18) | -0.0008(18) | -0.0003(16) |
| C(247) | 0.029(2)   | 0.065(3)   | 0.028(3)   | -0.007(2)   | -0.005(2)   | 0.018(2)    |
| C(248) | 0.048(3)   | 0.077(4)   | 0.051(4)   | -0.022(3)   | 0.011(3)    | 0.014(3)    |
| C(249) | 0.028(2)   | 0.032(2)   | 0.038(3)   | 0.003(2)    | -0.001(2)   | 0.0042(18)  |
| Fe(3)  | 0.0325(3)  | 0.0257(3)  | 0.0285(4)  | 0.0053(3)   | -0.0086(3)  | -0.0063(3)  |
| N(31)  | 0.035(2)   | 0.0232(17) | 0.0219(19) | 0.0021(15)  | -0.0105(15) | -0.0053(15) |
| N(32)  | 0.043(2)   | 0.0231(18) | 0.028(2)   | 0.0041(15)  | -0.0152(17) | -0.0107(15) |
| N(33)  | 0.0275(17) | 0.0205(16) | 0.0239(19) | 0.0060(14)  | -0.0052(15) | -0.0018(14) |
| N(34)  | 0.0300(18) | 0.0210(17) | 0.0229(19) | 0.0029(14)  | -0.0073(15) | -0.0043(14) |
| C(3a1) | 0.027(2)   | 0.022(2)   | 0.026(2)   | 0.0025(17)  | -0.0022(17) | -0.0007(16) |
| C(3a2) | 0.026(2)   | 0.022(2)   | 0.036(3)   | 0.0060(18)  | -0.0117(19) | -0.0019(16) |
| C(3a3) | 0.037(2)   | 0.025(2)   | 0.031(3)   | 0.0041(19)  | -0.012(2)   | -0.0113(18) |
| C(3a4) | 0.032(2)   | 0.031(2)   | 0.023(2)   | 0.0103(18)  | -0.0055(18) | -0.0088(18) |
| C(3a5) | 0.027(2)   | 0.024(2)   | 0.019(2)   | 0.0025(16)  | 0.0013(16)  | -0.0059(16) |
| C(3a6) | 0.0217(19) | 0.0202(19) | 0.027(2)   | -0.0006(17) | -0.0041(17) | -0.0037(15) |
| C(3a7) | 0.026(2)   | 0.025(2)   | 0.027(2)   | 0.0008(17)  | -0.0055(17) | -0.0030(16) |
| C(3a8) | 0.025(2)   | 0.023(2)   | 0.031(2)   | 0.0078(18)  | -0.0071(18) | -0.0014(16) |
| C(3b1) | 0.0221(19) | 0.0221(19) | 0.029(2)   | 0.0056(17)  | -0.0084(17) | -0.0053(15) |
| C(3b2) | 0.022(2)   | 0.025(2)   | 0.027(2)   | -0.0016(17) | -0.0076(17) | -0.0014(16) |
| C(3b3) | 0.047(3)   | 0.024(2)   | 0.035(3)   | 0.0080(19)  | -0.015(2)   | -0.0161(19) |
| C(3b4) | 0.043(3)   | 0.027(2)   | 0.030(3)   | 0.0086(19)  | -0.011(2)   | -0.0121(19) |
| C(3b5) | 0.031(2)   | 0.028(2)   | 0.020(2)   | 0.0020(17)  | -0.0088(17) | -0.0016(17) |
| C(3b6) | 0.023(2)   | 0.031(2)   | 0.021(2)   | -0.0008(18) | -0.0056(17) | -0.0021(16) |
| C(3b7) | 0.034(2)   | 0.0182(19) | 0.035(3)   | 0.0048(18)  | -0.0041(19) | -0.0067(17) |
| C(3b8) | 0.036(2)   | 0.020(2)   | 0.029(2)   | 0.0099(17)  | -0.0096(19) | -0.0063(17) |
| C(3m1) | 0.032(2)   | 0.024(2)   | 0.034(3)   | 0.0036(18)  | -0.0149(19) | -0.0081(17) |
| C(3m2) | 0.031(2)   | 0.026(2)   | 0.018(2)   | 0.0068(17)  | -0.0050(17) | -0.0057(16) |
| C(3m3) | 0.0214(19) | 0.0215(19) | 0.026(2)   | 0.0004(17)  | -0.0019(17) | -0.0022(15) |

**Table S5.** Continued

| atom   | $U_{11}$ | $U_{22}$   | $U_{33}$ | $U_{23}$    | $U_{13}$    | $U_{12}$    |
|--------|----------|------------|----------|-------------|-------------|-------------|
| C(3m4) | 0.025(2) | 0.024(2)   | 0.024(2) | 0.0025(17)  | -0.0058(17) | -0.0042(16) |
| C(311) | 0.039(2) | 0.0178(19) | 0.026(2) | 0.0064(17)  | -0.0140(19) | -0.0064(17) |
| C(312) | 0.032(2) | 0.029(2)   | 0.044(3) | 0.005(2)    | -0.015(2)   | -0.0024(18) |
| C(313) | 0.041(3) | 0.021(2)   | 0.048(3) | 0.001(2)    | -0.009(2)   | 0.0038(19)  |
| C(314) | 0.042(3) | 0.024(2)   | 0.031(3) | 0.0056(19)  | -0.013(2)   | -0.0107(19) |
| C(315) | 0.036(2) | 0.026(2)   | 0.034(3) | 0.0068(19)  | -0.003(2)   | -0.0079(18) |
| C(316) | 0.040(3) | 0.027(2)   | 0.035(3) | 0.0006(19)  | -0.003(2)   | -0.0068(19) |
| C(317) | 0.043(3) | 0.030(3)   | 0.109(6) | -0.009(3)   | -0.004(3)   | -0.004(2)   |
| C(318) | 0.058(3) | 0.029(2)   | 0.043(3) | -0.007(2)   | -0.009(2)   | -0.014(2)   |
| C(319) | 0.054(3) | 0.044(3)   | 0.059(4) | -0.010(3)   | 0.012(3)    | -0.013(2)   |
| C(321) | 0.037(2) | 0.0171(19) | 0.023(2) | 0.0040(16)  | -0.0085(18) | -0.0079(17) |
| C(322) | 0.037(3) | 0.049(3)   | 0.032(3) | 0.011(2)    | -0.002(2)   | -0.010(2)   |
| C(323) | 0.053(3) | 0.062(3)   | 0.034(3) | 0.013(3)    | -0.005(2)   | -0.023(3)   |
| C(324) | 0.073(4) | 0.048(3)   | 0.031(3) | 0.020(2)    | -0.019(3)   | -0.025(3)   |
| C(325) | 0.051(3) | 0.026(2)   | 0.044(3) | 0.007(2)    | -0.024(3)   | -0.002(2)   |
| C(326) | 0.045(3) | 0.024(2)   | 0.035(3) | 0.0010(19)  | -0.013(2)   | -0.0061(19) |
| C(327) | 0.037(3) | 0.086(4)   | 0.058(4) | 0.019(3)    | 0.012(3)    | -0.001(3)   |
| C(328) | 0.100(5) | 0.101(5)   | 0.049(4) | 0.038(4)    | -0.034(4)   | -0.034(4)   |
| C(329) | 0.053(3) | 0.045(3)   | 0.047(3) | -0.017(2)   | -0.007(3)   | 0.020(2)    |
| C(331) | 0.032(2) | 0.022(2)   | 0.018(2) | 0.0045(16)  | -0.0065(17) | -0.0032(17) |
| C(332) | 0.030(2) | 0.027(2)   | 0.020(2) | 0.0012(17)  | -0.0065(17) | -0.0046(17) |
| C(333) | 0.032(2) | 0.027(2)   | 0.027(2) | -0.0006(18) | -0.0031(19) | -0.0021(17) |
| C(334) | 0.036(2) | 0.029(2)   | 0.021(2) | 0.0084(18)  | -0.0115(18) | -0.0087(18) |
| C(335) | 0.024(2) | 0.027(2)   | 0.024(2) | 0.0057(17)  | -0.0014(17) | -0.0080(16) |
| C(336) | 0.025(2) | 0.025(2)   | 0.023(2) | 0.0062(17)  | -0.0053(17) | -0.0001(16) |
| C(337) | 0.035(2) | 0.032(2)   | 0.040(3) | -0.002(2)   | 0.004(2)    | -0.0050(19) |
| C(338) | 0.044(3) | 0.031(2)   | 0.035(3) | 0.000(2)    | -0.010(2)   | -0.014(2)   |
| C(339) | 0.030(2) | 0.032(2)   | 0.030(3) | 0.0037(19)  | 0.0023(19)  | 0.0027(18)  |
| C(341) | 0.031(2) | 0.0206(19) | 0.027(2) | 0.0038(17)  | -0.0050(18) | -0.0052(16) |
| C(342) | 0.045(3) | 0.030(2)   | 0.031(3) | 0.008(2)    | -0.004(2)   | -0.008(2)   |
| C(343) | 0.060(3) | 0.042(3)   | 0.027(3) | 0.005(2)    | -0.008(2)   | -0.020(2)   |
| C(344) | 0.064(3) | 0.030(2)   | 0.031(3) | 0.008(2)    | -0.028(3)   | -0.023(2)   |
| C(345) | 0.045(3) | 0.029(2)   | 0.055(4) | 0.015(2)    | -0.028(3)   | -0.005(2)   |
| C(346) | 0.038(2) | 0.024(2)   | 0.040(3) | 0.007(2)    | -0.016(2)   | -0.0023(18) |

**Table S5.** Continued

| atom   | $U_{11}$   | $U_{22}$   | $U_{33}$   | $U_{23}$    | $U_{13}$    | $U_{12}$    |
|--------|------------|------------|------------|-------------|-------------|-------------|
| C(347) | 0.049(3)   | 0.069(4)   | 0.049(4)   | 0.008(3)    | 0.017(3)    | 0.008(3)    |
| C(348) | 0.118(6)   | 0.052(3)   | 0.048(4)   | 0.023(3)    | -0.053(4)   | -0.029(4)   |
| C(349) | 0.040(3)   | 0.043(3)   | 0.058(4)   | 0.013(3)    | 0.003(3)    | 0.012(2)    |
| Fe(4a) | 0.0196(5)  | 0.0340(6)  | 0.0204(5)  | 0.0110(4)   | 0.0066(4)   | 0.0060(4)   |
| Fe(4b) | 0.0226(10) | 0.0249(11) | 0.0211(11) | 0.0046(9)   | 0.0048(8)   | 0.0017(8)   |
| N(41)  | 0.0267(18) | 0.038(2)   | 0.024(2)   | 0.0078(16)  | 0.0107(15)  | 0.0112(15)  |
| N(42)  | 0.0277(18) | 0.0236(17) | 0.0193(18) | 0.0057(14)  | 0.0079(14)  | 0.0052(14)  |
| N(43)  | 0.0242(18) | 0.0339(19) | 0.022(2)   | 0.0080(15)  | 0.0047(15)  | 0.0080(15)  |
| N(44)  | 0.0229(17) | 0.0294(18) | 0.0242(19) | 0.0055(15)  | 0.0086(14)  | 0.0057(14)  |
| C(4a1) | 0.027(2)   | 0.038(2)   | 0.026(2)   | 0.0058(19)  | 0.0062(18)  | 0.0092(18)  |
| C(4a2) | 0.028(2)   | 0.030(2)   | 0.025(2)   | 0.0097(18)  | 0.0095(18)  | 0.0100(17)  |
| C(4a3) | 0.031(2)   | 0.026(2)   | 0.018(2)   | 0.0041(17)  | 0.0058(17)  | 0.0043(17)  |
| C(4a4) | 0.0205(19) | 0.0199(18) | 0.019(2)   | 0.0021(16)  | 0.0014(16)  | 0.0025(15)  |
| C(4a5) | 0.023(2)   | 0.028(2)   | 0.020(2)   | 0.0047(17)  | 0.0062(16)  | 0.0027(16)  |
| C(4a6) | 0.024(2)   | 0.026(2)   | 0.027(2)   | 0.0024(18)  | 0.0070(17)  | 0.0037(16)  |
| C(4a7) | 0.027(2)   | 0.024(2)   | 0.017(2)   | 0.0034(17)  | 0.0058(17)  | 0.0014(16)  |
| C(4a8) | 0.026(2)   | 0.027(2)   | 0.024(2)   | 0.0021(17)  | 0.0061(17)  | 0.0050(17)  |
| C(4b1) | 0.031(2)   | 0.050(3)   | 0.034(3)   | 0.013(2)    | 0.011(2)    | 0.017(2)    |
| C(4b2) | 0.041(3)   | 0.046(3)   | 0.032(3)   | 0.020(2)    | 0.022(2)    | 0.018(2)    |
| C(4b3) | 0.029(2)   | 0.024(2)   | 0.014(2)   | 0.0030(16)  | 0.0033(17)  | 0.0020(16)  |
| C(4b4) | 0.025(2)   | 0.024(2)   | 0.022(2)   | 0.0004(17)  | 0.0009(17)  | -0.0002(16) |
| C(4b5) | 0.025(2)   | 0.035(2)   | 0.029(2)   | 0.0062(19)  | 0.0066(18)  | 0.0076(18)  |
| C(4b6) | 0.027(2)   | 0.037(2)   | 0.024(2)   | 0.0056(19)  | 0.0103(18)  | 0.0080(18)  |
| C(4b7) | 0.024(2)   | 0.026(2)   | 0.019(2)   | 0.0038(17)  | 0.0054(16)  | -0.0019(16) |
| C(4b8) | 0.026(2)   | 0.024(2)   | 0.023(2)   | 0.0013(17)  | -0.0010(17) | 0.0031(16)  |
| C(4m1) | 0.030(2)   | 0.032(2)   | 0.018(2)   | 0.0024(18)  | 0.0046(18)  | 0.0053(17)  |
| C(4m2) | 0.0213(19) | 0.026(2)   | 0.021(2)   | -0.0001(17) | 0.0013(16)  | 0.0082(16)  |
| C(4m3) | 0.028(2)   | 0.029(2)   | 0.020(2)   | 0.0062(17)  | 0.0084(17)  | 0.0063(17)  |
| C(4m4) | 0.028(2)   | 0.030(2)   | 0.025(2)   | 0.0019(18)  | 0.0062(18)  | 0.0066(17)  |
| C(411) | 0.031(2)   | 0.035(2)   | 0.025(2)   | 0.0149(19)  | 0.0102(19)  | 0.0123(18)  |
| C(412) | 0.049(3)   | 0.039(3)   | 0.024(2)   | 0.004(2)    | 0.008(2)    | 0.020(2)    |
| C(413) | 0.069(4)   | 0.045(3)   | 0.029(3)   | 0.008(2)    | 0.015(3)    | 0.027(3)    |
| C(414) | 0.063(4)   | 0.072(4)   | 0.037(3)   | 0.021(3)    | 0.028(3)    | 0.032(3)    |
| C(415) | 0.043(3)   | 0.063(3)   | 0.042(3)   | 0.025(3)    | 0.021(2)    | 0.006(3)    |

**Table S5.** Continued

| atom   | $U_{11}$   | $U_{22}$ | $U_{33}$ | $U_{23}$    | $U_{13}$    | $U_{12}$    |
|--------|------------|----------|----------|-------------|-------------|-------------|
| C(416) | 0.036(3)   | 0.047(3) | 0.036(3) | 0.016(2)    | 0.011(2)    | 0.010(2)    |
| C(417) | 0.096(5)   | 0.031(3) | 0.047(3) | -0.008(2)   | 0.009(3)    | 0.012(3)    |
| C(418) | 0.079(4)   | 0.106(5) | 0.038(4) | 0.023(4)    | 0.027(3)    | 0.026(4)    |
| C(419) | 0.057(3)   | 0.059(3) | 0.052(4) | 0.012(3)    | 0.006(3)    | -0.021(3)   |
| C(421) | 0.0195(19) | 0.029(2) | 0.015(2) | 0.0089(16)  | 0.0049(15)  | 0.0076(16)  |
| C(422) | 0.027(2)   | 0.031(2) | 0.018(2) | 0.0043(17)  | 0.0093(17)  | 0.0025(17)  |
| C(423) | 0.027(2)   | 0.032(2) | 0.023(2) | 0.0072(18)  | 0.0063(18)  | 0.0087(18)  |
| C(424) | 0.023(2)   | 0.038(2) | 0.021(2) | 0.0109(18)  | 0.0067(17)  | 0.0037(17)  |
| C(425) | 0.027(2)   | 0.047(3) | 0.016(2) | 0.0051(19)  | -0.0010(17) | 0.0002(19)  |
| C(426) | 0.022(2)   | 0.032(2) | 0.018(2) | 0.0046(17)  | 0.0052(16)  | 0.0029(16)  |
| C(427) | 0.032(2)   | 0.030(2) | 0.032(3) | -0.0030(19) | 0.003(2)    | 0.0058(18)  |
| C(428) | 0.031(2)   | 0.059(3) | 0.035(3) | 0.014(2)    | 0.004(2)    | 0.018(2)    |
| C(429) | 0.028(2)   | 0.036(2) | 0.040(3) | -0.005(2)   | 0.000(2)    | -0.0039(19) |
| C(431) | 0.025(2)   | 0.027(2) | 0.023(2) | 0.0060(17)  | 0.0060(17)  | 0.0112(16)  |
| C(432) | 0.032(2)   | 0.032(2) | 0.026(2) | 0.0060(19)  | 0.0066(19)  | 0.0076(18)  |
| C(433) | 0.029(2)   | 0.037(2) | 0.024(2) | 0.0040(19)  | 0.0049(18)  | 0.0149(18)  |
| C(434) | 0.025(2)   | 0.045(3) | 0.029(3) | 0.015(2)    | 0.0040(19)  | 0.0162(19)  |
| C(435) | 0.029(2)   | 0.035(2) | 0.038(3) | 0.016(2)    | 0.006(2)    | 0.0064(18)  |
| C(436) | 0.020(2)   | 0.031(2) | 0.032(2) | 0.0085(18)  | 0.0053(18)  | 0.0089(17)  |
| C(437) | 0.058(3)   | 0.037(3) | 0.042(3) | -0.002(2)   | 0.008(3)    | -0.005(2)   |
| C(438) | 0.038(3)   | 0.064(3) | 0.036(3) | 0.024(3)    | 0.009(2)    | 0.011(2)    |
| C(439) | 0.033(2)   | 0.042(3) | 0.043(3) | -0.008(2)   | 0.005(2)    | -0.004(2)   |
| C(441) | 0.028(2)   | 0.034(2) | 0.019(2) | 0.0099(18)  | 0.0076(17)  | 0.0083(18)  |
| C(442) | 0.037(3)   | 0.036(2) | 0.036(3) | 0.008(2)    | 0.015(2)    | 0.011(2)    |
| C(443) | 0.051(3)   | 0.048(3) | 0.046(3) | 0.014(3)    | 0.017(3)    | 0.024(2)    |
| C(444) | 0.039(3)   | 0.072(4) | 0.030(3) | 0.021(3)    | 0.013(2)    | 0.029(3)    |
| C(445) | 0.023(2)   | 0.083(4) | 0.028(3) | 0.006(3)    | 0.0042(19)  | 0.006(2)    |
| C(446) | 0.024(2)   | 0.045(3) | 0.034(3) | 0.009(2)    | 0.0082(19)  | 0.0003(19)  |
| C(447) | 0.038(3)   | 0.042(3) | 0.069(4) | -0.010(3)   | 0.012(3)    | 0.006(2)    |
| C(448) | 0.058(4)   | 0.133(6) | 0.044(4) | 0.020(4)    | 0.003(3)    | 0.059(4)    |
| C(449) | 0.036(3)   | 0.057(3) | 0.060(4) | -0.005(3)   | 0.009(3)    | -0.006(2)   |
| C(1s)  | 0.098(5)   | 0.074(5) | 0.050(4) | -0.024(3)   | -0.024(4)   | 0.034(4)    |
| C(2s)  | 0.132(7)   | 0.074(5) | 0.069(5) | -0.017(4)   | -0.039(5)   | 0.045(5)    |
| C(3s)  | 0.157(9)   | 0.082(6) | 0.063(5) | -0.006(4)   | -0.055(6)   | -0.004(6)   |

**Table S5.** Continued

| atom  | $U_{11}$ | $U_{22}$ | $U_{33}$ | $U_{23}$  | $U_{13}$  | $U_{12}$   |
|-------|----------|----------|----------|-----------|-----------|------------|
| C(4s) | 0.131(7) | 0.059(4) | 0.078(5) | -0.023(4) | -0.041(5) | 0.023(4)   |
| C(5s) | 0.099(6) | 0.086(5) | 0.054(4) | -0.012(4) | -0.001(4) | -0.001(4)  |
| C(6s) | 0.084(5) | 0.075(4) | 0.047(4) | -0.019(3) | -0.020(3) | 0.027(4)   |
| C(7s) | 0.098(6) | 0.082(5) | 0.102(7) | -0.026(5) | -0.032(5) | 0.029(4)   |
| Cl(1) | 0.060(2) | 0.097(3) | 0.122(4) | -0.016(3) | 0.007(2)  | 0.0091(19) |

<sup>a</sup>The estimated standard deviations of the least significant digits are given in parentheses. The anisotropic displacement factor exponent takes the form:  $-2 \pi [h^2 U_{11} + \dots + 2 h k a^* b^* U_{12}]$ .

**Table S6.** Hydrogen Atom Coordinates and Equivalent Isotropic Displacement Parameters ( $\text{\AA}^2$ ) for  $[\text{Fe}(\text{TMP})(2\text{-MeHIm})_2]_2 \cdot [\text{Fe}(\text{TMP})(2\text{-MeHIm})]_2$

| atom   | $x$     | $y$    | $z$    | $U(\text{eq})$ |
|--------|---------|--------|--------|----------------|
| H(16n) | 0.0135  | 0.3977 | 0.3728 | 0.031          |
| H(12)  | 0.0401  | 0.3668 | 0.3075 | 0.033          |
| H(13)  | 0.0969  | 0.3536 | 0.3359 | 0.032          |
| H(14a) | 0.0530  | 0.3976 | 0.4825 | 0.053          |
| H(14b) | 0.0222  | 0.4145 | 0.4551 | 0.053          |
| H(14c) | 0.0581  | 0.4325 | 0.4553 | 0.053          |
| H(14n) | 0.2413  | 0.3706 | 0.5137 | 0.038          |
| H(16)  | 0.2187  | 0.3153 | 0.5316 | 0.049          |
| H(17)  | 0.1625  | 0.3144 | 0.4952 | 0.042          |
| H(18a) | 0.2013  | 0.4166 | 0.4260 | 0.061          |
| H(18b) | 0.2291  | 0.4217 | 0.4664 | 0.061          |
| H(18c) | 0.1909  | 0.4315 | 0.4767 | 0.061          |
| H(1b1) | 0.0751  | 0.3574 | 0.5990 | 0.030          |
| H(1b2) | 0.0613  | 0.3050 | 0.5575 | 0.029          |
| H(1b3) | 0.1105  | 0.2474 | 0.4015 | 0.032          |
| H(1b4) | 0.1541  | 0.2650 | 0.3432 | 0.030          |
| H(1b5) | 0.1940  | 0.3840 | 0.2819 | 0.037          |
| H(1b6) | 0.1736  | 0.4410 | 0.2989 | 0.034          |
| H(1b7) | 0.1264  | 0.4984 | 0.4562 | 0.038          |
| H(1b8) | 0.1161  | 0.4764 | 0.5379 | 0.039          |
| H(113) | 0.0003  | 0.2302 | 0.4642 | 0.030          |
| H(115) | 0.0774  | 0.1989 | 0.5455 | 0.028          |
| H(1d7) | 0.0390  | 0.2870 | 0.3988 | 0.047          |
| H(1e7) | 0.0248  | 0.3083 | 0.4426 | 0.047          |
| H(1f7) | 0.0025  | 0.2791 | 0.4197 | 0.047          |
| H(1d8) | 0.0236  | 0.1600 | 0.5047 | 0.053          |
| H(1e8) | -0.0077 | 0.1836 | 0.5166 | 0.053          |
| H(1f8) | 0.0195  | 0.1756 | 0.5568 | 0.053          |
| H(1d9) | 0.1276  | 0.2291 | 0.5521 | 0.046          |
| H(1e9) | 0.1241  | 0.2689 | 0.5460 | 0.046          |
| H(1f9) | 0.1385  | 0.2466 | 0.5032 | 0.046          |
| H(123) | 0.1893  | 0.2915 | 0.1972 | 0.044          |
| H(125) | 0.2662  | 0.2892 | 0.2893 | 0.044          |
| H(1g7) | 0.1378  | 0.3153 | 0.2162 | 0.068          |

**Table S6.** Continued

| atom   | $x$    | $y$    | $z$    | $U(\text{eq})$ |
|--------|--------|--------|--------|----------------|
| H(1h7) | 0.1386 | 0.3435 | 0.2567 | 0.068          |
| H(1i7) | 0.1265 | 0.3063 | 0.2693 | 0.068          |
| H(1g8) | 0.2476 | 0.2511 | 0.1906 | 0.096          |
| H(1h8) | 0.2772 | 0.2753 | 0.2081 | 0.096          |
| H(1i8) | 0.2512 | 0.2879 | 0.1685 | 0.096          |
| H(1g9) | 0.2597 | 0.3041 | 0.3688 | 0.071          |
| H(1h9) | 0.2232 | 0.3114 | 0.3900 | 0.071          |
| H(1i9) | 0.2444 | 0.3412 | 0.3666 | 0.071          |
| H(133) | 0.0873 | 0.5294 | 0.3041 | 0.032          |
| H(135) | 0.1866 | 0.5432 | 0.3259 | 0.032          |
| H(1j7) | 0.0587 | 0.4827 | 0.3319 | 0.049          |
| H(1k7) | 0.0715 | 0.4708 | 0.3832 | 0.049          |
| H(1l7) | 0.0807 | 0.4493 | 0.3369 | 0.049          |
| H(1j8) | 0.1344 | 0.5931 | 0.3082 | 0.058          |
| H(1k8) | 0.1158 | 0.5751 | 0.2647 | 0.058          |
| H(1l8) | 0.1558 | 0.5772 | 0.2657 | 0.058          |
| H(1j9) | 0.2086 | 0.4687 | 0.3649 | 0.049          |
| H(1k9) | 0.1988 | 0.4876 | 0.4132 | 0.049          |
| H(1l9) | 0.2188 | 0.5072 | 0.3724 | 0.049          |
| H(143) | 0.0509 | 0.4556 | 0.6647 | 0.078          |
| H(145) | 0.1418 | 0.4188 | 0.6952 | 0.066          |
| H(1m7) | 0.0275 | 0.4535 | 0.5877 | 0.109          |
| H(1n7) | 0.0357 | 0.4184 | 0.5625 | 0.109          |
| H(1p7) | 0.0535 | 0.4521 | 0.5444 | 0.109          |
| H(1m8) | 0.1108 | 0.4428 | 0.7579 | 0.141          |
| H(1n8) | 0.0708 | 0.4423 | 0.7523 | 0.141          |
| H(1p8) | 0.0915 | 0.4756 | 0.7398 | 0.141          |
| H(1m9) | 0.1731 | 0.3883 | 0.6396 | 0.085          |
| H(1n9) | 0.1743 | 0.4104 | 0.5921 | 0.085          |
| H(1p9) | 0.1548 | 0.3753 | 0.5925 | 0.085          |
| H(26n) | 0.2425 | 0.8475 | 0.7498 | 0.044          |
| H(22)  | 0.2123 | 0.7970 | 0.7776 | 0.059          |
| H(23)  | 0.1538 | 0.8061 | 0.7555 | 0.051          |
| H(24a) | 0.2064 | 0.8990 | 0.6745 | 0.083          |

**Table S6.** Continued

| atom   | $x$     | $y$    | $z$    | $U(\text{eq})$ |
|--------|---------|--------|--------|----------------|
| H(24b) | 0.2306  | 0.9049 | 0.7192 | 0.083          |
| H(24c) | 0.1922  | 0.9168 | 0.7214 | 0.083          |
| H(28n) | 0.0113  | 0.9019 | 0.6355 | 0.034          |
| H(26)  | 0.0341  | 0.8676 | 0.5703 | 0.039          |
| H(27)  | 0.0898  | 0.8492 | 0.5993 | 0.036          |
| H(28a) | 0.0494  | 0.8991 | 0.7440 | 0.055          |
| H(28b) | 0.0230  | 0.9214 | 0.7149 | 0.055          |
| H(28c) | 0.0616  | 0.9324 | 0.7172 | 0.055          |
| H(2b1) | 0.1418  | 0.7591 | 0.6018 | 0.030          |
| H(2b2) | 0.0979  | 0.7442 | 0.6618 | 0.031          |
| H(2b3) | 0.0552  | 0.8020 | 0.8194 | 0.024          |
| H(2b4) | 0.0714  | 0.8544 | 0.8618 | 0.026          |
| H(2b5) | 0.1192  | 0.9714 | 0.8019 | 0.039          |
| H(2b6) | 0.1287  | 0.9930 | 0.7204 | 0.034          |
| H(2b7) | 0.1735  | 0.9349 | 0.5631 | 0.032          |
| H(2b8) | 0.1914  | 0.8768 | 0.5448 | 0.031          |
| H(213) | -0.0132 | 0.7362 | 0.7264 | 0.031          |
| H(215) | 0.0626  | 0.6961 | 0.8028 | 0.030          |
| H(2d7) | 0.0276  | 0.7918 | 0.6633 | 0.041          |
| H(2e7) | 0.0197  | 0.8134 | 0.7099 | 0.041          |
| H(2f7) | -0.0081 | 0.7886 | 0.6888 | 0.041          |
| H(2d8) | -0.0209 | 0.6912 | 0.7967 | 0.060          |
| H(2e8) | 0.0113  | 0.6675 | 0.8019 | 0.060          |
| H(2f8) | -0.0079 | 0.6699 | 0.7520 | 0.060          |
| H(2d9) | 0.1260  | 0.7406 | 0.7587 | 0.043          |
| H(2e9) | 0.1153  | 0.7205 | 0.8056 | 0.043          |
| H(2f9) | 0.1145  | 0.7606 | 0.8053 | 0.043          |
| H(223) | 0.1404  | 0.9142 | 0.9587 | 0.065          |
| H(225) | 0.0474  | 0.9464 | 0.9295 | 0.046          |
| H(2g7) | 0.1561  | 0.8730 | 0.8534 | 0.103          |
| H(2h7) | 0.1733  | 0.8851 | 0.9020 | 0.103          |
| H(2i7) | 0.1749  | 0.9085 | 0.8558 | 0.103          |
| H(2g8) | 0.1037  | 0.9292 | 1.0233 | 0.103          |
| H(2h8) | 0.0647  | 0.9346 | 1.0119 | 0.103          |



**Table S6.** Continued

| atom   | $x$     | $y$    | $z$    | $U(\text{eq})$ |
|--------|---------|--------|--------|----------------|
| H(2i8) | 0.0903  | 0.9654 | 1.0073 | 0.103          |
| H(2g9) | 0.0512  | 0.9486 | 0.8117 | 0.085          |
| H(2h9) | 0.0250  | 0.9436 | 0.8544 | 0.085          |
| H(2i9) | 0.0372  | 0.9119 | 0.8239 | 0.085          |
| H(233) | 0.1884  | 1.0381 | 0.5925 | 0.041          |
| H(235) | 0.0916  | 1.0225 | 0.5595 | 0.041          |
| H(2j7) | 0.1961  | 0.9794 | 0.6810 | 0.057          |
| H(2k7) | 0.2179  | 1.0030 | 0.6469 | 0.057          |
| H(2l7) | 0.2111  | 0.9648 | 0.6324 | 0.057          |
| H(2j8) | 0.1412  | 1.0865 | 0.5654 | 0.073          |
| H(2k8) | 0.1189  | 1.0686 | 0.5255 | 0.073          |
| H(2l8) | 0.1589  | 1.0675 | 0.5219 | 0.073          |
| H(2j9) | 0.0631  | 0.9741 | 0.5815 | 0.054          |
| H(2k9) | 0.0707  | 0.9655 | 0.6361 | 0.054          |
| H(2l9) | 0.0850  | 0.9418 | 0.5948 | 0.054          |
| H(243) | 0.1828  | 0.8022 | 0.4494 | 0.044          |
| H(245) | 0.2514  | 0.7712 | 0.5445 | 0.040          |
| H(2m7) | 0.1189  | 0.8176 | 0.5252 | 0.061          |
| H(2n7) | 0.1315  | 0.8232 | 0.4717 | 0.061          |
| H(2p7) | 0.1370  | 0.8519 | 0.5107 | 0.061          |
| H(2m8) | 0.2606  | 0.7912 | 0.4444 | 0.088          |
| H(2n8) | 0.2296  | 0.7716 | 0.4212 | 0.088          |
| H(2p8) | 0.2537  | 0.7528 | 0.4581 | 0.088          |
| H(2m9) | 0.2163  | 0.8086 | 0.6451 | 0.049          |
| H(2n9) | 0.2465  | 0.7856 | 0.6267 | 0.049          |
| H(2p9) | 0.2110  | 0.7691 | 0.6392 | 0.049          |
| H(3b1) | -0.0568 | 0.1250 | 0.3384 | 0.029          |
| H(3b2) | -0.0475 | 0.1816 | 0.3038 | 0.030          |
| H(3b3) | -0.0798 | 0.2422 | 0.1412 | 0.043          |
| H(3b4) | -0.1108 | 0.2254 | 0.0691 | 0.040          |
| H(3b5) | -0.1811 | 0.1181 | 0.0177 | 0.031          |
| H(3b6) | -0.1949 | 0.0639 | 0.0549 | 0.030          |
| H(3b7) | -0.1608 | 0.0020 | 0.2152 | 0.035          |
| H(3b8) | -0.1268 | 0.0170 | 0.2858 | 0.034          |

**Table S6.** Continued

| atom   | $x$     | $y$     | $z$     | $U(\text{eq})$ |
|--------|---------|---------|---------|----------------|
| H(313) | -0.0732 | 0.2896  | 0.2923  | 0.044          |
| H(315) | 0.0158  | 0.2591  | 0.2386  | 0.038          |
| H(3d7) | -0.1230 | 0.2593  | 0.2804  | 0.091          |
| H(3e7) | -0.1185 | 0.2196  | 0.2747  | 0.091          |
| H(3f7) | -0.1242 | 0.2425  | 0.2287  | 0.091          |
| H(3d8) | 0.0131  | 0.3032  | 0.3032  | 0.065          |
| H(3e8) | -0.0226 | 0.3194  | 0.3148  | 0.065          |
| H(3f8) | -0.0050 | 0.3264  | 0.2645  | 0.065          |
| H(3d9) | 0.0201  | 0.2123  | 0.1896  | 0.079          |
| H(3e9) | -0.0132 | 0.1997  | 0.1633  | 0.079          |
| H(3f9) | -0.0011 | 0.1819  | 0.2115  | 0.079          |
| H(323) | -0.1098 | 0.1831  | -0.0822 | 0.059          |
| H(325) | -0.2004 | 0.2136  | -0.0397 | 0.048          |
| H(3g7) | -0.0771 | 0.1464  | -0.0346 | 0.090          |
| H(3h7) | -0.0909 | 0.1338  | 0.0158  | 0.090          |
| H(3i7) | -0.0714 | 0.1688  | 0.0120  | 0.090          |
| H(3g8) | -0.1492 | 0.2355  | -0.1220 | 0.125          |
| H(3h8) | -0.1855 | 0.2183  | -0.1237 | 0.125          |
| H(3i8) | -0.1533 | 0.1981  | -0.1418 | 0.125          |
| H(3g9) | -0.2124 | 0.1715  | 0.0537  | 0.072          |
| H(3h9) | -0.2180 | 0.2098  | 0.0387  | 0.072          |
| H(3i9) | -0.1915 | 0.2006  | 0.0794  | 0.072          |
| H(333) | -0.1911 | -0.0443 | 0.0639  | 0.034          |
| H(335) | -0.2626 | -0.0044 | 0.1480  | 0.030          |
| H(3j7) | -0.1379 | -0.0217 | 0.0564  | 0.054          |
| H(3k7) | -0.1241 | -0.0033 | 0.1031  | 0.054          |
| H(3l7) | -0.1372 | 0.0184  | 0.0590  | 0.054          |
| H(3j8) | -0.2558 | -0.0598 | 0.0585  | 0.055          |
| H(3k8) | -0.2753 | -0.0538 | 0.1075  | 0.055          |
| H(3l8) | -0.2438 | -0.0785 | 0.1058  | 0.055          |
| H(3j9) | -0.2547 | 0.0468  | 0.1881  | 0.046          |
| H(3k9) | -0.2250 | 0.0709  | 0.1710  | 0.046          |
| H(3l9) | -0.2190 | 0.0454  | 0.2141  | 0.046          |
| H(343) | -0.1091 | 0.0510  | 0.4359  | 0.052          |

**Table S6.** Continued

| atom   | $x$     | $y$     | $z$    | $U(\text{eq})$ |
|--------|---------|---------|--------|----------------|
| H(345) | -0.0248 | 0.0186  | 0.3728 | 0.051          |
| H(3m7) | -0.1554 | 0.0702  | 0.3497 | 0.084          |
| H(3n7) | -0.1353 | 0.1049  | 0.3481 | 0.084          |
| H(3p7) | -0.1454 | 0.0887  | 0.3982 | 0.084          |
| H(3m8) | -0.0685 | 0.0228  | 0.4834 | 0.109          |
| H(3n8) | -0.0307 | 0.0229  | 0.4640 | 0.109          |
| H(3p8) | -0.0547 | -0.0084 | 0.4533 | 0.109          |
| H(3m9) | -0.0446 | 0.0388  | 0.2578 | 0.071          |
| H(3n9) | -0.0146 | 0.0270  | 0.2918 | 0.071          |
| H(3l9) | -0.0204 | 0.0661  | 0.2815 | 0.071          |
| H(4b1) | -0.2366 | 0.4179  | 0.6021 | 0.046          |
| H(4b2) | -0.2178 | 0.3890  | 0.6759 | 0.048          |
| H(4b3) | -0.1081 | 0.3218  | 0.7272 | 0.027          |
| H(4b4) | -0.0541 | 0.3075  | 0.6879 | 0.029          |
| H(4b5) | 0.0019  | 0.3338  | 0.5210 | 0.036          |
| H(4b6) | -0.0153 | 0.3662  | 0.4494 | 0.035          |
| H(4b7) | -0.1227 | 0.4375  | 0.4018 | 0.028          |
| H(4b8) | -0.1789 | 0.4470  | 0.4364 | 0.029          |
| H(4l3) | -0.1677 | 0.3830  | 0.8269 | 0.057          |
| H(4l5) | -0.2063 | 0.2962  | 0.7826 | 0.059          |
| H(4d7) | -0.1574 | 0.4226  | 0.7278 | 0.087          |
| H(4e7) | -0.1223 | 0.4031  | 0.7279 | 0.087          |
| H(4f7) | -0.1367 | 0.4187  | 0.7763 | 0.087          |
| H(4d8) | -0.2249 | 0.3290  | 0.8623 | 0.111          |
| H(4e8) | -0.1923 | 0.3465  | 0.8845 | 0.111          |
| H(4f8) | -0.1914 | 0.3076  | 0.8706 | 0.111          |
| H(4d9) | -0.2022 | 0.3084  | 0.6639 | 0.084          |
| H(4e9) | -0.2043 | 0.2792  | 0.7029 | 0.084          |
| H(4f9) | -0.1690 | 0.2885  | 0.6791 | 0.084          |
| H(423) | 0.0193  | 0.2390  | 0.6004 | 0.033          |
| H(425) | 0.0529  | 0.3189  | 0.6717 | 0.036          |
| H(4g7) | -0.0376 | 0.2699  | 0.5333 | 0.047          |
| H(4h7) | -0.0610 | 0.2668  | 0.5794 | 0.047          |
| H(4i7) | -0.0351 | 0.2375  | 0.5667 | 0.047          |

**Table S6.** Continued

| atom   | $x$     | $y$    | $z$    | $U(\text{eq})$ |
|--------|---------|--------|--------|----------------|
| H(4h8) | 0.0896  | 0.2596 | 0.6299 | 0.063          |
| H(4h8) | 0.0658  | 0.2320 | 0.6539 | 0.063          |
| H(4i8) | 0.0789  | 0.2633 | 0.6846 | 0.063          |
| H(4g9) | 0.0046  | 0.3785 | 0.6244 | 0.052          |
| H(4h9) | 0.0257  | 0.3705 | 0.6715 | 0.052          |
| H(4i9) | -0.0143 | 0.3673 | 0.6721 | 0.052          |
| H(433) | -0.0490 | 0.3895 | 0.2997 | 0.036          |
| H(435) | -0.0150 | 0.4694 | 0.3727 | 0.040          |
| H(4j7) | -0.0875 | 0.3516 | 0.3333 | 0.068          |
| H(4k7) | -0.1060 | 0.3614 | 0.3819 | 0.068          |
| H(4l7) | -0.0719 | 0.3402 | 0.3832 | 0.068          |
| H(4j8) | 0.0137  | 0.4391 | 0.2906 | 0.069          |
| H(4k8) | -0.0141 | 0.4674 | 0.2822 | 0.069          |
| H(4l8) | -0.0183 | 0.4313 | 0.2581 | 0.069          |
| H(4j9) | -0.0647 | 0.4660 | 0.4666 | 0.059          |
| H(4k9) | -0.0280 | 0.4785 | 0.4521 | 0.059          |
| H(4l9) | -0.0325 | 0.4451 | 0.4831 | 0.059          |
| H(443) | -0.2487 | 0.5124 | 0.4979 | 0.058          |
| H(445) | -0.2896 | 0.4260 | 0.4535 | 0.054          |
| H(4m7) | -0.1967 | 0.5143 | 0.5348 | 0.075          |
| H(4n7) | -0.1721 | 0.4828 | 0.5291 | 0.075          |
| H(4p7) | -0.1955 | 0.4859 | 0.5751 | 0.075          |
| H(4m8) | -0.3147 | 0.4768 | 0.4282 | 0.117          |
| H(4n8) | -0.2954 | 0.5116 | 0.4359 | 0.117          |
| H(4p8) | -0.3191 | 0.4970 | 0.4770 | 0.117          |
| H(4m9) | -0.2244 | 0.3737 | 0.4767 | 0.076          |
| H(4n9) | -0.2639 | 0.3743 | 0.4665 | 0.076          |
| H(4p9) | -0.2504 | 0.3734 | 0.5202 | 0.076          |

<sup>a</sup>  $U(\text{eq})$  is defined as one third of the trace of the orthogonalized  $\mathbf{U}_{ij}$  tensor the estimated standard deviations of the least significant digits are given in parentheses.

## Captions for Supporting Information Figures

Figure S1. ORTEP diagram of [Fe(TMP)(2-MeHIm)] (mol 3) showing the two orientations of the imidazole ligand. The major (55%) orientation is drawn with heavy bonds, while the minor orientation is depicted with open bonds. 50% probability ellipsoids are depicted.

Figure S2. ORTEP diagram of [Fe(TMP)(2-MeHIm)] (mol 4) showing the two disordered parts of both iron and imidazole ligands. The major (68%) orientation is drawn with heavy bonds, while the minor orientation is depicted with open bonds. 50% probability ellipsoids are depicted.

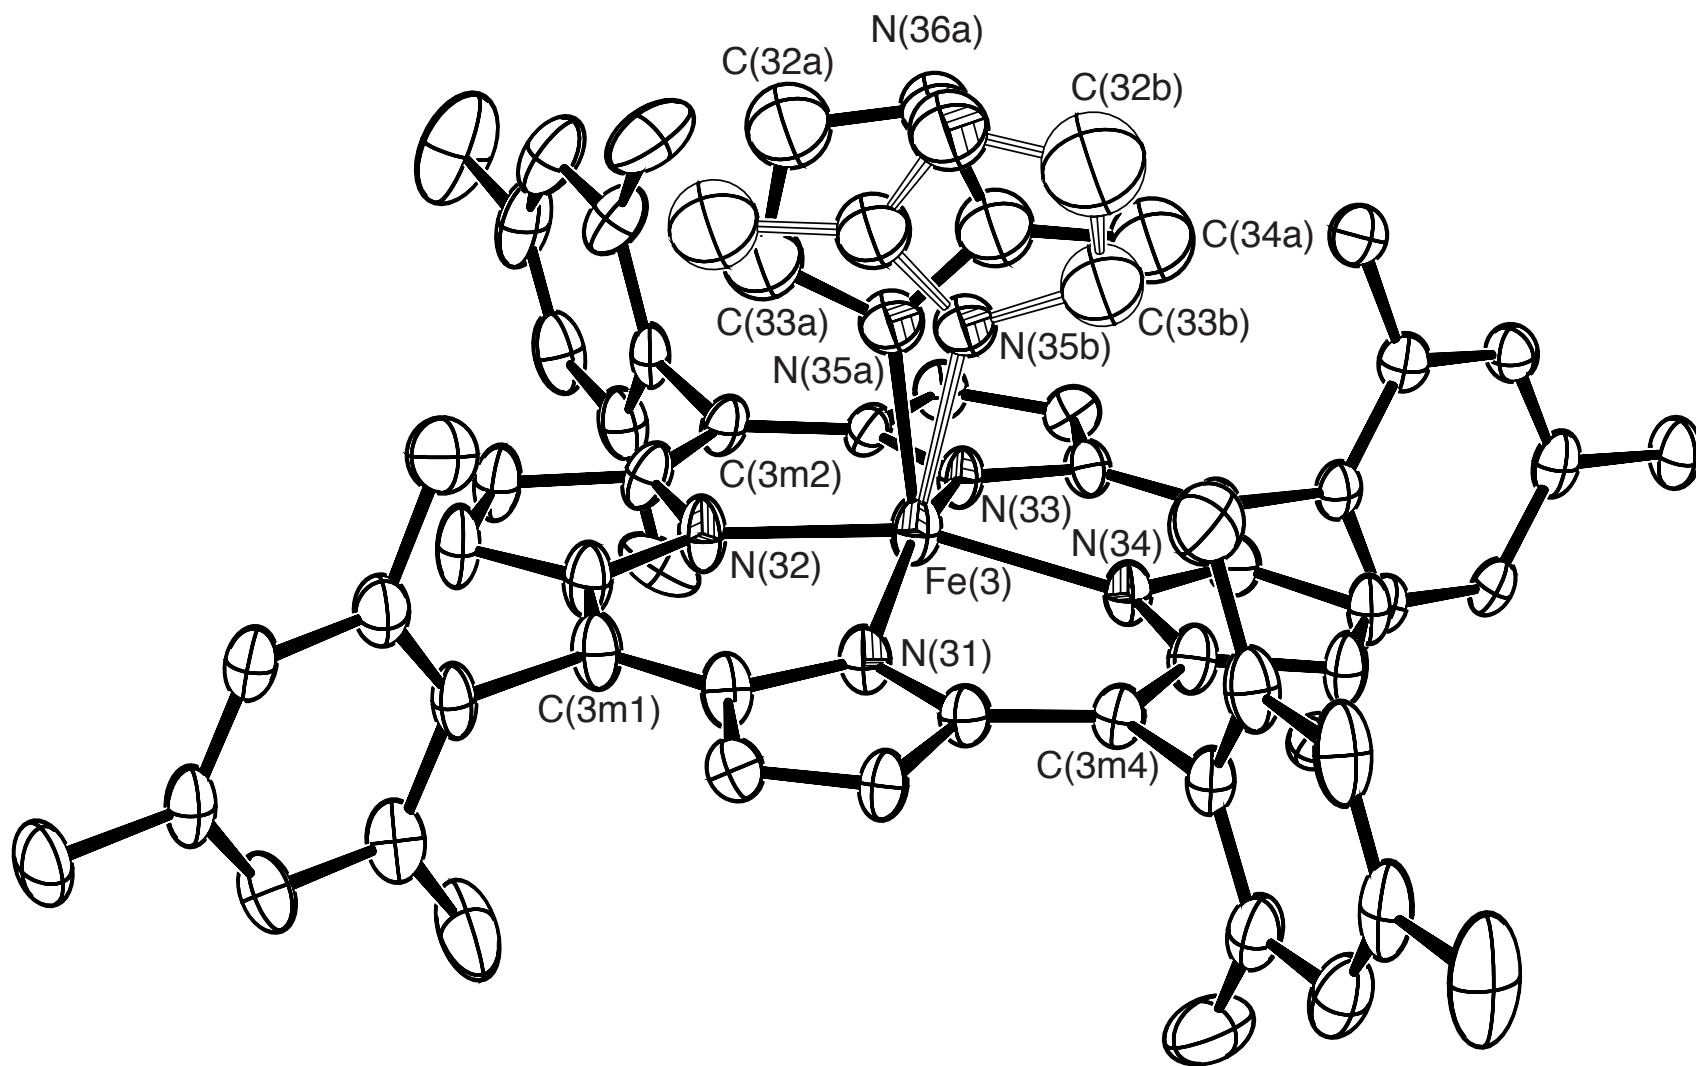

Figure S1

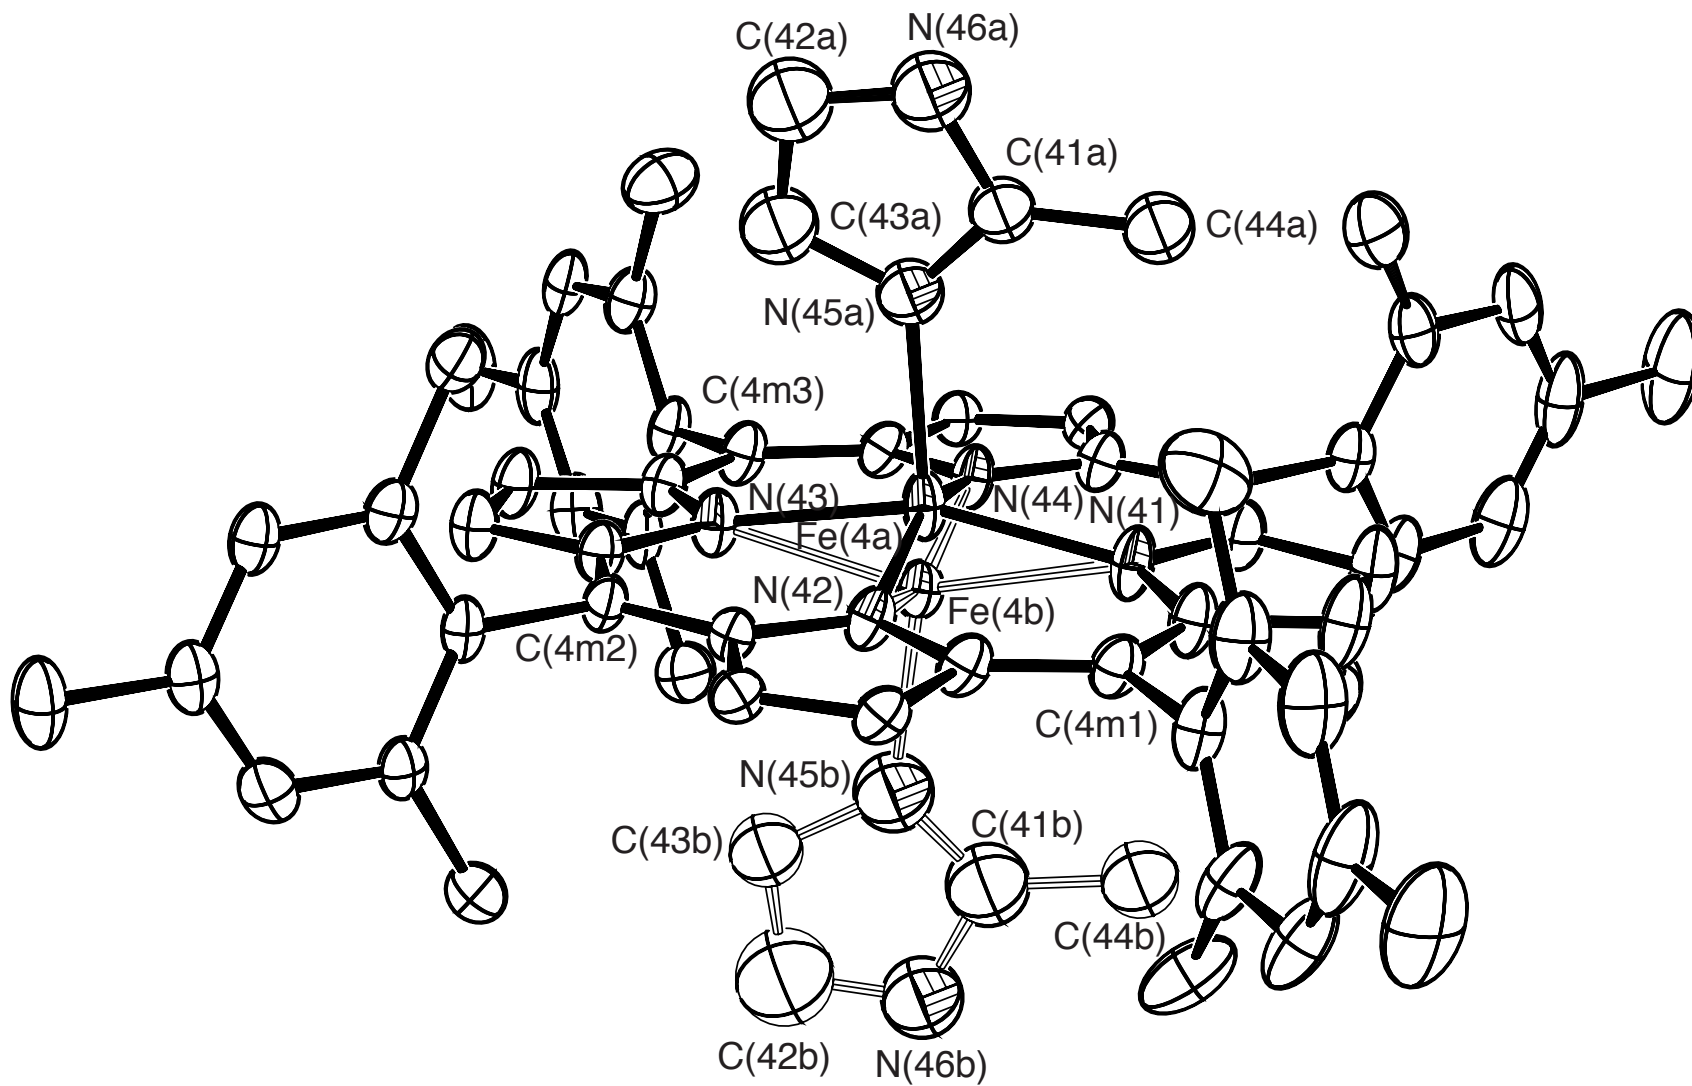

Figure S2
